# Supplementary material for: Preparation of sulfur–MOF composites and their application in the Willgerodt–Kindler reaction
Source: Royal Society of Chemistry journal article supplement (doi:10.1039/d4nj01335b), 2024-01-01
Supplement: d4nj01335b1.pdf [file d4nj01335b1.pdf]

## Electronic Supplementary Information (ESI)

### Preparation of sulfur-MOF composites and their application in Willgerodt-Kindler reaction

Andrey V. Sokolov\*, Evgeniy A. Kvetkin

Samara State Medical University, Chapayevskaya St. 89, Samara 443099, Russian Federation

\*Corresponding author: a.v.sokolov@samsmu.ru

#### Table of Contents

|                                                                                                    |     |
|----------------------------------------------------------------------------------------------------|-----|
| Figure S1. EDX analysis of S@MIL101(Fe) particles.....                                             | S2  |
| Figure S2. EDX analysis of S@MIL88A particles.....                                                 | S3  |
| Figure S3. S@CAU-10(H) atom mapping.....                                                           | S4  |
| Figure S4. S@MIL-53(Al) atom mapping.....                                                          | S4  |
| Figure S5. S@MIL-101(Cr) atom mapping.....                                                         | S5  |
| Figure S6. Activated MOF and MOF after sulfur sorption (20% w/w) photo.....                        | S5  |
| Scheme S1. Scheme 1. CAU-10H-assisted phenylacetic thiomorpholide synthesis.....                   | S6  |
| Table S1. Reaction parameters screening for the synthesis of phenylacetic acid thiomorpholide..... | S6  |
| Scheme S2. CAU-10H-assisted thiomorpholides synthesis.....                                         | S7  |
| Table S2. CAU-10H-assisted WK-reaction products yields.....                                        | S7  |
| Characterization of compounds <b>2a-2p</b> , <b>4a</b> , <b>4b</b> .....                           | S8  |
| NMR spectra of compounds <b>2a-2p</b> , <b>4a</b> , <b>4b</b> .....                                | S13 |

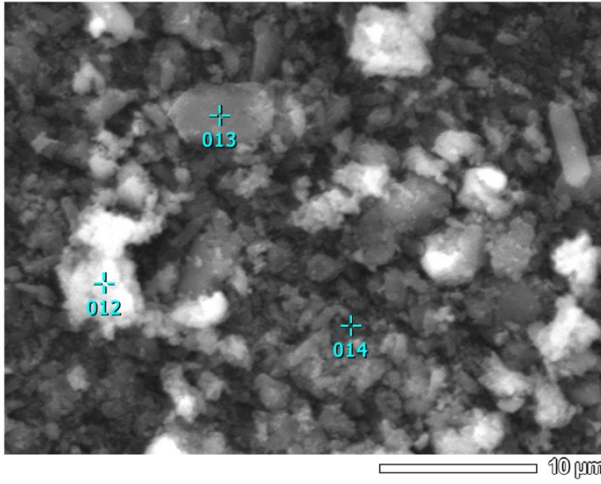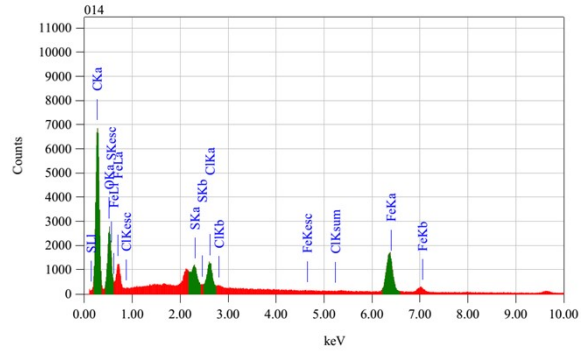

Thin Film Standardless Standardless Quantitative Analysis  
Fitting Coefficient : 0.6227

| Element    | (keV) | Mass%  | Counts   | Error% | Atom%  | Compound | Mass% | Cation |
|------------|-------|--------|----------|--------|--------|----------|-------|--------|
| C K (Ref.) | 0.277 | 61.67  | 31378.64 | 0.00   | 80.31  |          |       |        |
| O K        | 0.525 | 10.70  | 14305.46 | 0.03   | 10.46  |          |       |        |
| S K        | 2.307 | 3.15   | 4470.63  | 0.18   | 1.54   |          |       |        |
| Cl K       | 2.621 | 5.20   | 6889.14  | 0.12   | 2.30   |          |       |        |
| Fe K       | 6.398 | 19.28  | 10953.78 | 0.09   | 5.40   |          |       |        |
| Total      |       | 100.00 |          |        | 100.00 |          |       |        |

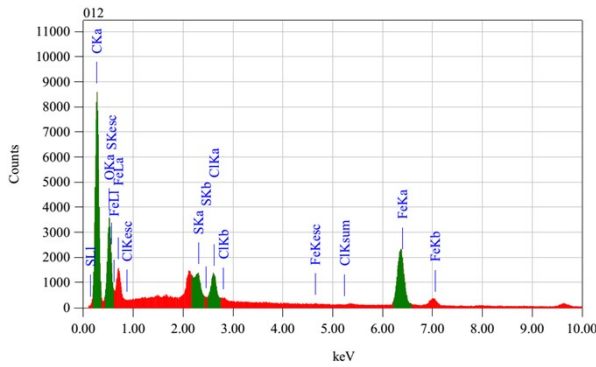

Thin Film Standardless Standardless Quantitative Analysis  
Fitting Coefficient : 0.6596

| Element    | (keV) | Mass%  | Counts   | Error% | Atom%  | Compound | Mass% | Cation |
|------------|-------|--------|----------|--------|--------|----------|-------|--------|
| C K (Ref.) | 0.277 | 61.20  | 38392.46 | 0.00   | 79.96  |          |       |        |
| O K        | 0.525 | 11.27  | 18587.72 | 0.03   | 11.06  |          |       |        |
| S K        | 2.307 | 2.63   | 4606.78  | 0.23   | 1.29   |          |       |        |
| Cl K       | 2.621 | 4.28   | 6995.09  | 0.16   | 1.90   |          |       |        |
| Fe K       | 6.398 | 20.62  | 14439.05 | 0.09   | 5.79   |          |       |        |
| Total      |       | 100.00 |          |        | 100.00 |          |       |        |

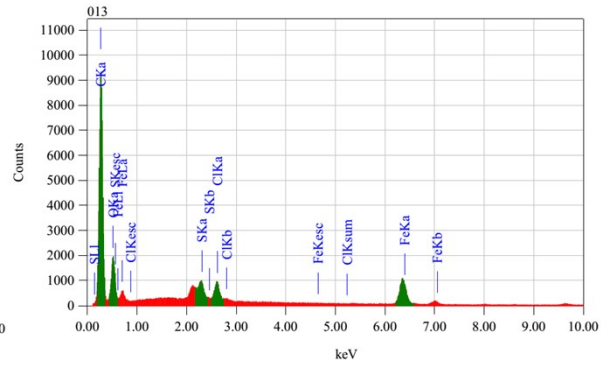

Thin Film Standardless Standardless Quantitative Analysis  
Fitting Coefficient : 0.6678

| Element    | (keV) | Mass%  | Counts   | Error% | Atom%  | Compound | Mass% | Cation |
|------------|-------|--------|----------|--------|--------|----------|-------|--------|
| C K (Ref.) | 0.277 | 75.86  | 32690.97 | 0.00   | 88.45  |          |       |        |
| O K        | 0.525 | 7.30   | 8264.28  | 0.05   | 6.39   |          |       |        |
| S K        | 2.307 | 2.44   | 2931.93  | 0.30   | 1.06   |          |       |        |
| Cl K       | 2.621 | 3.39   | 3799.68  | 0.24   | 1.34   |          |       |        |
| Fe K       | 6.398 | 11.02  | 5303.62  | 0.20   | 2.76   |          |       |        |
| Total      |       | 100.00 |          |        | 100.00 |          |       |        |

Fig S1. EDX analysis of S@MIL101(Fe) particles

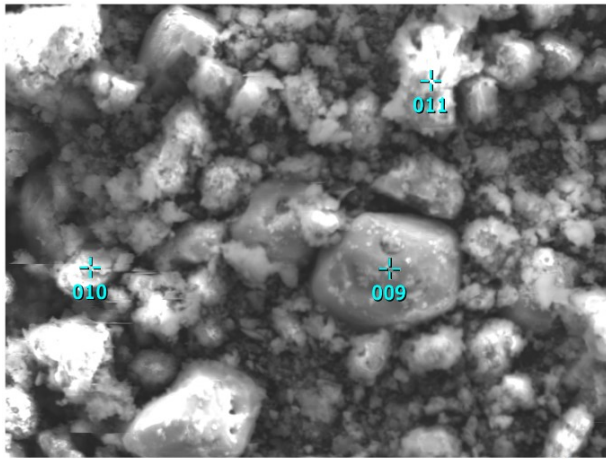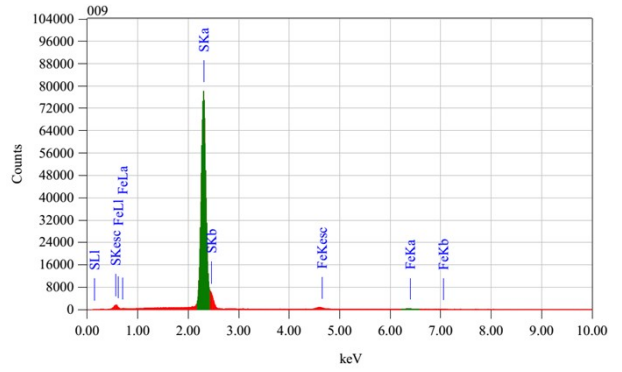

Thin Film Standardless Standardless Quantitative Analysis  
Fitting Coefficient : 0.6205

| Element    | (keV) | Mass%  | Counts    | Error% | Atom% | Compound | Mass% | Cation |
|------------|-------|--------|-----------|--------|-------|----------|-------|--------|
| S K (Ref.) | 2.307 | 99.42  | 609391.50 | 0.02   | 99.67 |          |       |        |
| Fe K       | 6.398 | 0.58   | 1417.35   | 7.84   | 0.33  |          |       |        |
| Total      |       | 100.00 |           |        |       |          |       |        |

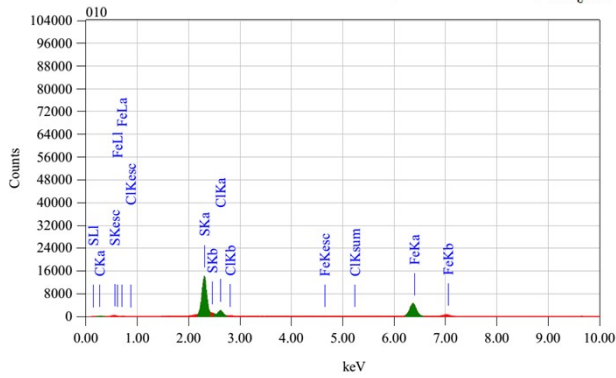

Thin Film Standardless Standardless Quantitative Analysis  
Fitting Coefficient : 0.6376

| Element    | (keV) | Mass%  | Counts    | Error% | Atom%  | Compound | Mass% | Cation |
|------------|-------|--------|-----------|--------|--------|----------|-------|--------|
| C K        | 0.277 | 1.01   | 705.50    | 0.31   | 3.19   |          |       |        |
| S K (Ref.) | 2.307 | 51.85  | 101371.03 | 0.01   | 61.53  |          |       |        |
| Cl K       | 2.621 | 8.06   | 14691.05  | 0.11   | 8.65   |          |       |        |
| Fe K       | 6.398 | 39.08  | 30555.65  | 0.06   | 26.63  |          |       |        |
| Total      |       | 100.00 |           |        | 100.00 |          |       |        |

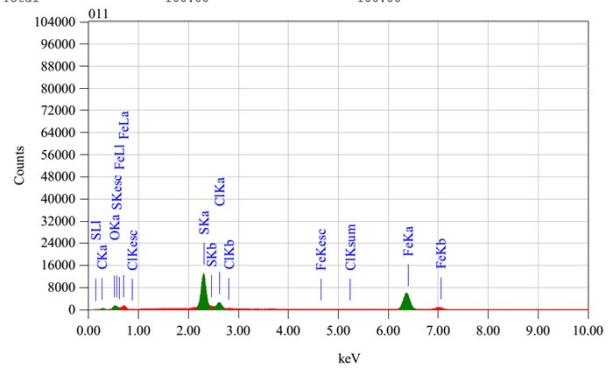

Thin Film Standardless Standardless Quantitative Analysis  
Fitting Coefficient : 0.6677

| Element    | (keV) | Mass%  | Counts   | Error% | Atom%  | Compound | Mass% | Cation |
|------------|-------|--------|----------|--------|--------|----------|-------|--------|
| C K        | 0.277 | 2.68   | 2058.23  | 0.12   | 8.27   |          |       |        |
| O K        | 0.525 | 2.79   | 5628.12  | 0.14   | 6.46   |          |       |        |
| S K (Ref.) | 2.307 | 39.50  | 84631.27 | 0.02   | 45.64  |          |       |        |
| Cl K       | 2.621 | 8.15   | 16272.83 | 0.11   | 8.51   |          |       |        |
| Fe K       | 6.398 | 46.89  | 40171.28 | 0.05   | 31.11  |          |       |        |
| Total      |       | 100.00 |          |        | 100.00 |          |       |        |

Fig S2. EDX analysis of S@MIL88A particles



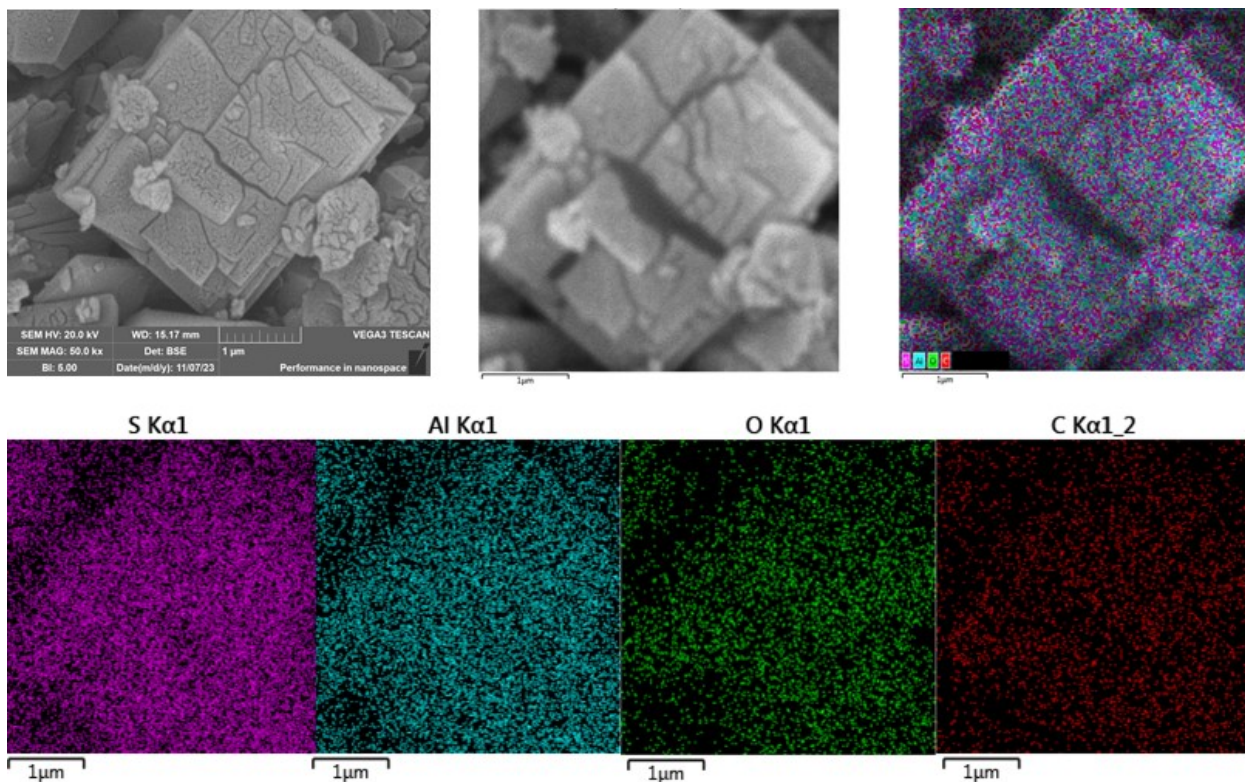

Fig S3. S@CAU-10(H) atom mapping.

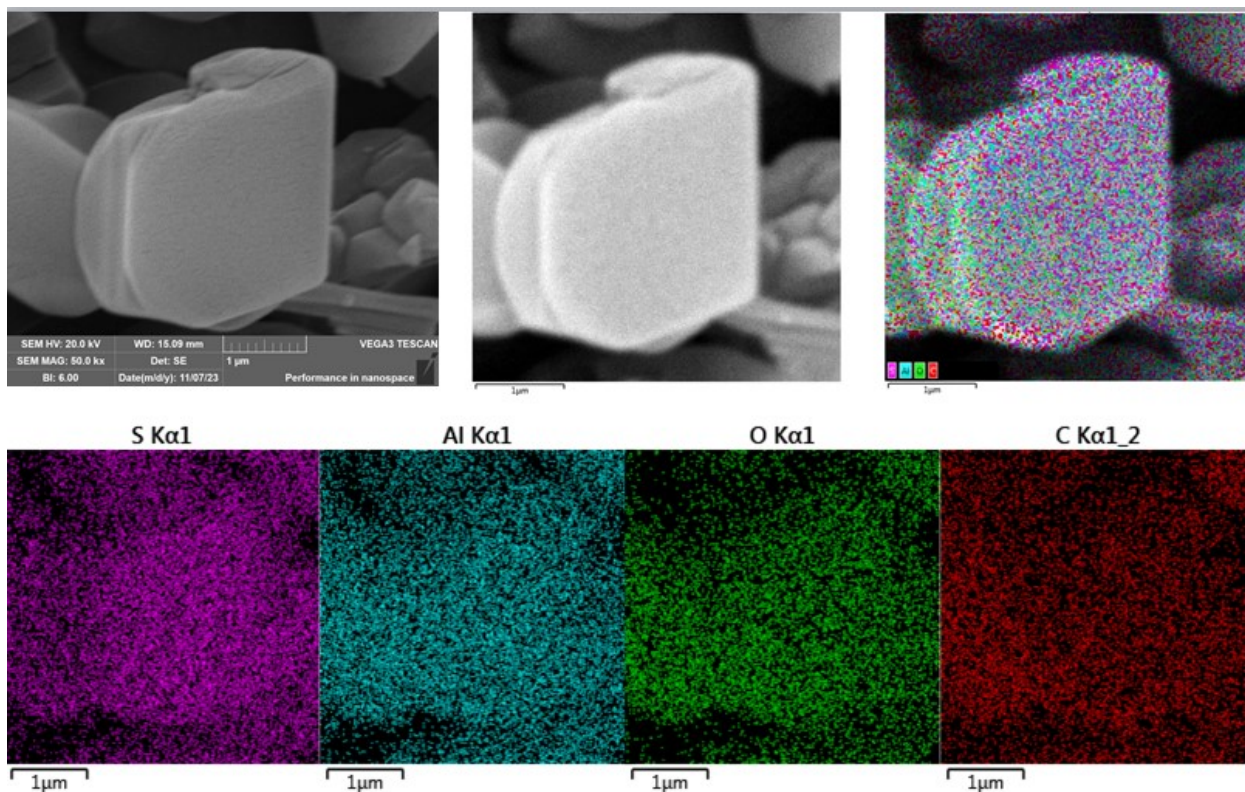

Fig S4. S@MIL-53(Al) atom mapping.



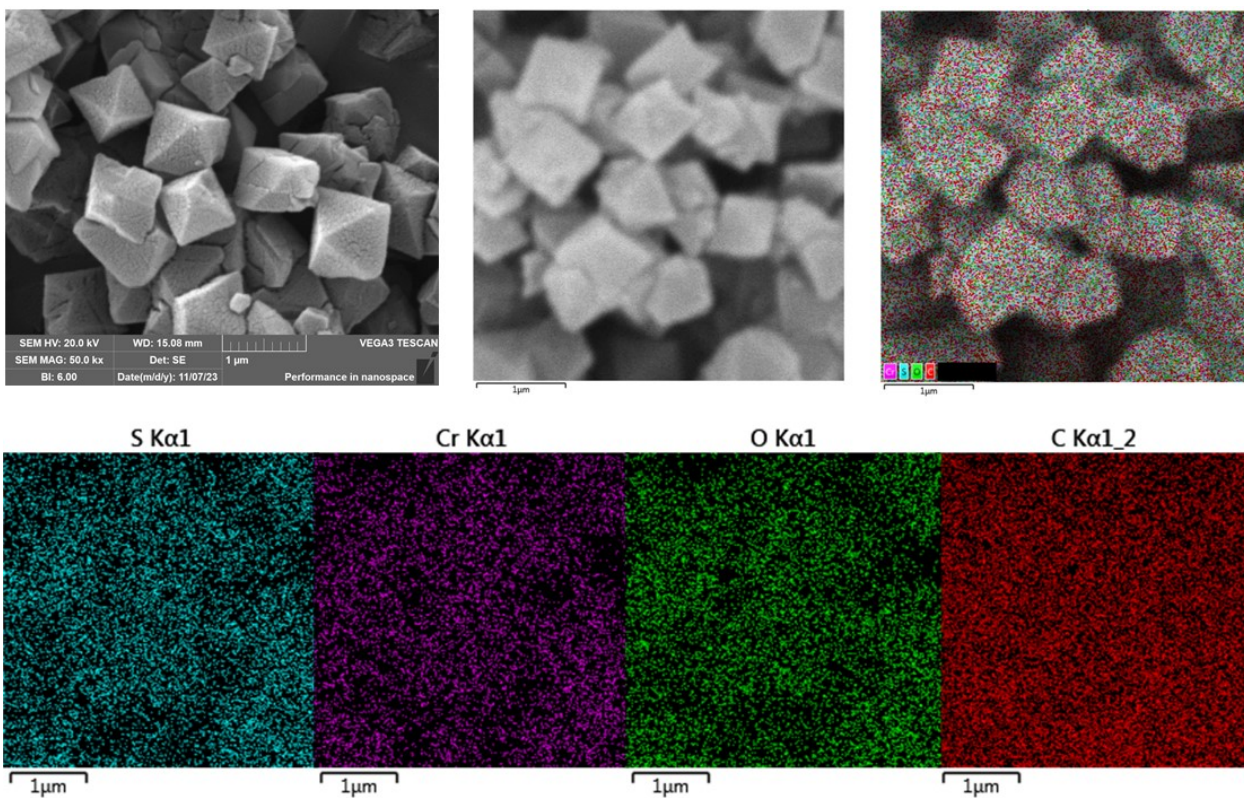

Fig S5. S@MIL-101(Cr) atom mapping.

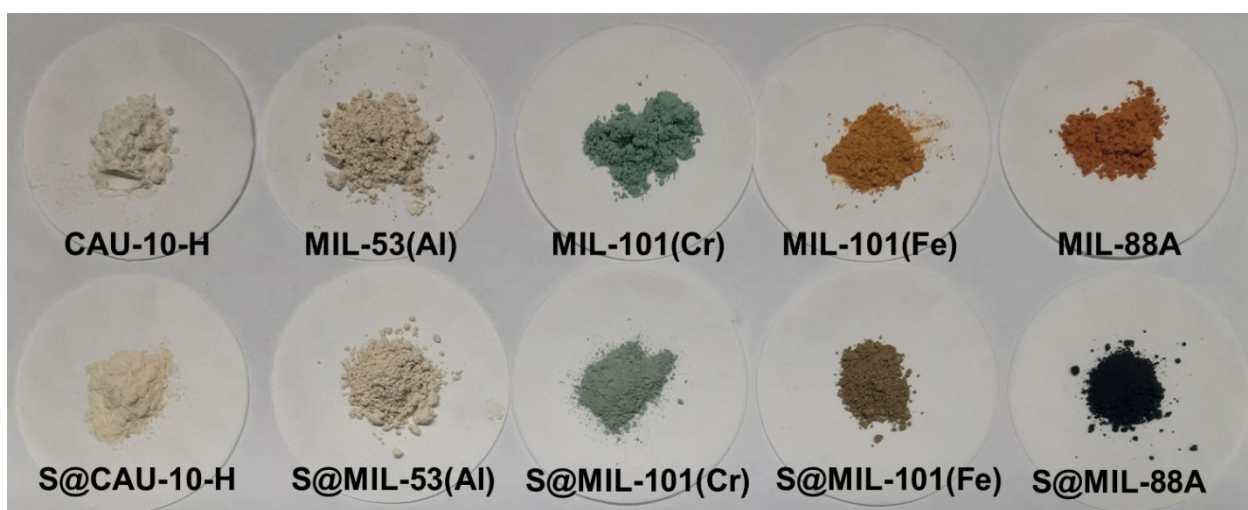

Fig S6. Activated MOF and MOF after sulfur sorption (20% w/w) photo.

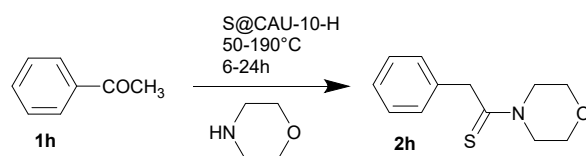

Scheme S1. CAU-10-H-assisted phenylacetic thiomorpholide synthesis.

| Entry     | S <sub>8</sub> mass fraction in CAU-10-H, % | Sulfur, equiv. | Morpholine, equiv. | Temperature, °C | Reaction time, h | Isolated yield, % |
|-----------|---------------------------------------------|----------------|--------------------|-----------------|------------------|-------------------|
| 1         | 20                                          | 1              | 1                  | 160             | 10               | 59                |
| 2         | 20                                          | 1              | 1.5                | 160             | 10               | 66                |
| 3         | 20                                          | 1              | 2                  | 160             | 10               | 62                |
| 4         | 20                                          | 1              | 3                  | 160             | 10               | 61                |
| 5         | 20                                          | 1.2            | 1.2                | 160             | 10               | 83                |
| 6         | 20                                          | 1.5            | 1.5                | 160             | 10               | 79                |
| 7         | 20                                          | 1.5            | 2                  | 160             | 10               | 77                |
| 8         | 20                                          | 2              | 1                  | 160             | 10               | 75                |
| 9         | 20                                          | 2              | 2                  | 160             | 10               | 57                |
| 10        | 20                                          | 2              | 3                  | 160             | 10               | 56                |
| 11        | 20 <sup>a</sup>                             | 1.2            | 1.2                | 160             | 10               | 72                |
| 12        | - <sup>b</sup>                              | 1.2            | 1.2                | 160             | 10               | 0                 |
| 13        | 15                                          | 1.2            | 1.2                | 160             | 10               | 66                |
| 14        | 10                                          | 1.2            | 1.2                | 160             | 10               | 63                |
| 15        | 20                                          | 1.2            | 1.2                | 50              | 24               | 0                 |
| 16        | 20                                          | 1.2            | 1.2                | 100             | 8                | 11                |
| 17        | 20                                          | 1.2            | 1.2                | 100             | 24               | 22                |
| 18        | 20                                          | 1.2            | 1.2                | 120             | 24               | 36                |
| 19        | 20                                          | 1.2            | 1.2                | 150             | 6                | 71                |
| <b>20</b> | <b>20</b>                                   | <b>1.2</b>     | <b>1.2</b>         | <b>150</b>      | <b>8</b>         | <b>83</b>         |
| 21        | 20                                          | 1.2            | 1.2                | 150             | 16               | 80                |
| 22        | 20                                          | 1.2            | 1.2                | 150             | 24               | 75                |
| 23        | 20                                          | 1.2            | 1.2                | 170             | 8                | 72                |
| 24        | 20                                          | 1.2            | 1.2                | 190             | 8                | 40                |

<sup>a</sup>Grounded sulfur and CAU-10(H) mixture, <sup>b</sup>without MOF

Table S1. Reaction parameters screening for the synthesis of phenylacetic acid thiomorpholide.

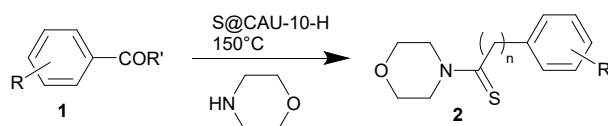

Scheme S2. CAU-10-H-assisted thiomorpholides synthesis.

| Entry | Substrate | R                                                      | R' | Product | n | Reaction time, h | Isolated yield, % |
|-------|-----------|--------------------------------------------------------|----|---------|---|------------------|-------------------|
| 1     | 1a        | H                                                      | H  | 2a      | 0 | 8                | 86                |
| 2     | 1b        | 4-Me                                                   | H  | 2b      | 0 | 8                | 91                |
| 3     | 1c        | 4-Cl                                                   | H  | 2c      | 0 | 8                | 78                |
| 4     | 1d        | 4-OMe                                                  | H  | 2d      | 0 | 8                | 81                |
| 5     | 1e        | 4-NMe <sub>2</sub>                                     | H  | 2e      | 0 | 8                | 70                |
| 6     | 1f        | 4-NO <sub>2</sub>                                      | H  | 2f      | 0 | 8                | 68                |
| 7     | 1g        | 3- NO <sub>2</sub>                                     | H  | 2g      | 0 | 8                | 56                |
| 8     | 1h        | H                                                      | Me | 2h      | 1 | 8                | 83                |
| 9     | 1i        | 4-Me                                                   | Me | 2i      | 1 | 8                | 79                |
| 10    | 1j        | 4-Ph                                                   | Me | 2j      | 1 | 8                | 82                |
| 11    | 1k        | 4-OMe                                                  | Me | 2k      | 1 | 8                | 83                |
| 12    | 1l        | 4- NMe <sub>2</sub>                                    | Me | 2l      | 1 | 8                | 62                |
| 13    | 1m        | C <sub>6</sub> H <sub>4</sub><br>( $\alpha$ -naphthyl) | Me | 2m      | 1 | 16               | 58                |
| 14    | 1n        | H                                                      | Et | 2n      | 2 | 16               | 79                |
| 15    | 1o        | 4-Me                                                   | Et | 2o      | 2 | 16               | 76                |
| 16    | 1p        | 4-OMe                                                  | Et | 2p      | 2 | 16               | 63                |

Table S2. CAU-10-H-assisted WK-reaction products yields.



## Characterization of compounds **2a-2p**, **4a**, **4b**

### Benzoic acid thiomorpholide (**2a**)

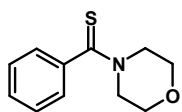

Mp 137 °C (from EtOH) (lit.,<sup>1</sup> 138 °C); <sup>1</sup>H NMR (DMSO-d<sub>6</sub>, 298 K, 400 MHz): δ<sub>H</sub> = 7.24-7.38 (m, 5H, Ar-H), 4.28 (t, *J*<sub>H-H</sub> = 4.8 Hz, 2H, CH<sub>2</sub>), 3.74 (t, *J*<sub>H-H</sub> = 5.0 Hz, 2H, CH<sub>2</sub>), 3.49-3.56 (m, 4H, CH<sub>2</sub>) ppm; <sup>13</sup>C NMR (DMSO-d<sub>6</sub>, 298 K, 100 MHz): δ<sub>C</sub> = 199.2 (CS), 142.9 (C<sub>Ar</sub>), 129.8 (CH<sub>Ar</sub>), 128.8 (CH<sub>Ar</sub>), 126.4 (CH<sub>Ar</sub>), 66.5 (OCH<sub>2</sub>), 66.2 (OCH<sub>2</sub>), 52.8 (NCH<sub>2</sub>), 49.7 (NCH<sub>2</sub>) ppm; **Elemental analysis:** Found: C, 63.69; H, 6.3. Calc. for C<sub>11</sub>H<sub>13</sub>NOS: C, 63.72; H, 6.32%; **IR-ATR:** 2981, 2917, 2845, 1573, 1492, 1475, 1108, 1223, 1022 cm<sup>-1</sup>.

### p-Toluic acid thiomorpholide (**2b**)

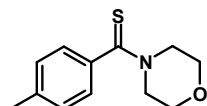

Mp 127 °C (from EtOH) (lit.,<sup>2</sup> 127-129 °C); <sup>1</sup>H NMR (DMSO-d<sub>6</sub>, 298 K, 400 MHz): δ<sub>H</sub> = 7.12-7.20 (m, 4H, Ar-H), 4.27 (t, *J*<sub>H-H</sub> = 4.9 Hz, 2H, CH<sub>2</sub>), 3.73 (t, *J*<sub>H-H</sub> = 5.0 Hz, 2H, CH<sub>2</sub>), 3.50-3.56 (m, 4H, CH<sub>2</sub>), 2.28 (s, 3H, CH<sub>3</sub>) ppm; <sup>13</sup>C NMR (DMSO-d<sub>6</sub>, 298 K, 100 MHz): δ<sub>C</sub> = 199.6 (CS), 140.2 (C<sub>Ar</sub>), 138.7 (C<sub>Ar</sub>CH<sub>3</sub>), 129.2 (CH<sub>Ar</sub>), 126.6 (CH<sub>Ar</sub>), 66.6 (OCH<sub>2</sub>), 66.2 (OCH<sub>2</sub>), 52.8 (NCH<sub>2</sub>), 49.9 (NCH<sub>2</sub>), 21.3 (ArCH<sub>3</sub>) ppm. **Elemental analysis:** Found: C, 65.10; H, 6.85. Calc. for C<sub>12</sub>H<sub>15</sub>NOS: C, 65.12; H, 6.83%; **IR-ATR:** 2974, 2915, 2852, 1605, 1510, 1473, 1429, 1105, 1290, 1255, 1222 cm<sup>-1</sup>.

### 4-Chlorobenzoic acid thiomorpholide (**2c**)

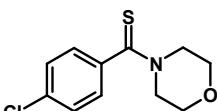

Mp 138-139 °C (from EtOH) (lit.,<sup>3</sup> 136-138 °C); <sup>1</sup>H NMR (DMSO-d<sub>6</sub>, 298 K, 400 MHz): δ<sub>H</sub> = 7.42 (d, *J*<sub>H-H</sub> = 8.5 Hz, 2H, Ar-H), 7.28 (d, *J*<sub>H-H</sub> = 8.5 Hz, 2H, Ar-H), 4.26 (t, *J*<sub>H-H</sub> = 4.9 Hz, 2H, CH<sub>2</sub>), 3.74 (t, *J*<sub>H-H</sub> = 5.0 Hz, 2H, CH<sub>2</sub>), 3.49-3.56 (m, 4H, CH<sub>2</sub>) ppm; <sup>13</sup>C NMR (DMSO-d<sub>6</sub>, 298 K, 100 MHz): δ<sub>C</sub> = 197.7 (CS), 141.6 (C<sub>Ar</sub>), 133.7 (CCl<sub>Ar</sub>), 128.9 (CH<sub>Ar</sub>), 128.3 (CH<sub>Ar</sub>), 66.5 (OCH<sub>2</sub>), 66.2 (OCH<sub>2</sub>), 52.9 (NCH<sub>2</sub>), 49.8 (NCH<sub>2</sub>) ppm; **Elemental analysis:** Found: C, 54.69; H, 5.05. Calc. for C<sub>11</sub>H<sub>12</sub>ClNOS: C, 54.64; H, 5.00%; **IR-ATR:** 2983, 2916, 2851, 1590, 1498, 1473, 1110, 1289, 1233, 1030 cm<sup>-1</sup>.

### 4-Methoxybenzoic acid thiomorpholide (**2d**)

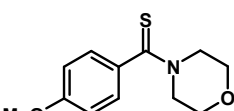

Mp 102-103 °C (from *i*-PrOH) (lit.,<sup>4</sup> 100 °C); <sup>1</sup>H NMR (DMSO-d<sub>6</sub>, 298 K, 400 MHz): δ<sub>H</sub> = 7.25 (d, *J*<sub>H-H</sub> = 8.7 Hz, 2H, Ar-H), 6.90 (d, *J*<sub>H-H</sub> = 8.8 Hz, 2H, Ar-H), 4.26 (br.s, 2H, CH<sub>2</sub>), 3.74 (s, 3H, OMe), 3.23 (br.s, 2H, CH<sub>2</sub>), 3.55 (br.s, 4H, CH<sub>2</sub>) ppm; <sup>13</sup>C NMR (DMSO-d<sub>6</sub>, 298 K, 100 MHz): δ<sub>C</sub> = 199.5 (CS), 160.1 (CO<sub>Ar</sub>), 135.2 (C<sub>Ar</sub>), 128.6 (CH<sub>Ar</sub>), 113.0 (CH<sub>Ar</sub>), 66.6(OCH<sub>2</sub>), 66.3 (OCH<sub>2</sub>), 55.8 (OCH<sub>3</sub>), 53.0 (NCH<sub>2</sub>), 50.2 (NCH<sub>2</sub>) ppm; **Elemental analysis:** Found: C, 60.70; H, 6.40. Calc. for C<sub>12</sub>H<sub>15</sub>NO<sub>2</sub>S: C, 60.73; H, 6.37%; **IR-ATR:** 3005, 2953, 2846, 1603, 1508, 1478, 1108, 1224, 1029 cm<sup>-1</sup>.

### 4-(Dimethylamino)benzoic acid thiomorpholide (**2e**)

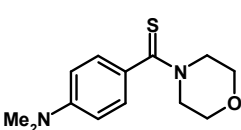

Mp 147-148 °C (from *i*-PrOH) (lit.,<sup>5</sup> 149-150 °C); <sup>1</sup>H NMR (DMSO-d<sub>6</sub>, 298 K, 400 MHz): δ<sub>H</sub> = 7.20 (d, *J*<sub>H-H</sub> = 8.8 Hz, 2H, Ar-H), 6.63 (d, *J*<sub>H-H</sub> = 8.9 Hz, 2H, Ar-H), 4.20 (br.s, 2H, CH<sub>2</sub>), 3.63 (br.s, 6H, CH<sub>2</sub>), 2.90 (s, 6H, NMe<sub>2</sub>) ppm; <sup>13</sup>C NMR (DMSO-d<sub>6</sub>, 298 K, 100 MHz): δ<sub>C</sub> = 200.5 (CS), 151.3 (CN<sub>Ar</sub>), 129.9 (C<sub>Ar</sub>), 129.1 (CH<sub>Ar</sub>), 111.3 (CH<sub>Ar</sub>), 66.5 (OCH<sub>2</sub>), 53.2 (NCH<sub>2</sub>), 50.8 (NCH<sub>2</sub>), 40.4 (NCH<sub>3</sub>) ppm; **Elemental analysis:** Found: C, 62.34; H, 7.29. Calc. for C<sub>13</sub>H<sub>18</sub>N<sub>2</sub>OS: C, 62.37; H, 7.25%; **IR-ATR:** 2960, 2882, 2848, 1598, 1517, 1361, 1113, 1280, 1218 cm<sup>-1</sup>.

#### 4-Nitrobenzoic acid thiomorpholide (**2f**)

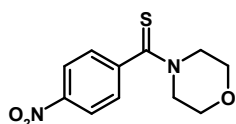

Mp 202 °C (from *i*-PrOH/DMF) (lit.,<sup>6</sup> 202-203 °C); <sup>1</sup>H NMR (DMSO-d<sub>6</sub>, 298 K, 400 MHz): δ<sub>H</sub> = 8.19 (d, *J*<sub>H-H</sub> = 8.7 Hz, 2H, Ar-H), 7.51 (d, *J*<sub>H-H</sub> = 8.7 Hz, 2H, Ar-H), 4.27 (t, *J*<sub>H-H</sub> = 4.9 Hz, 2H, CH<sub>2</sub>), 3.76 (t, *J*<sub>H-H</sub> = 5.0 Hz, 2H, CH<sub>2</sub>), 3.46-3.57 (m, 4H, CH<sub>2</sub>) ppm; <sup>13</sup>C NMR (DMSO-d<sub>6</sub>, 298 K, 100 MHz): δ<sub>C</sub> = 196.0 (CS), 148.3 (C<sub>NAr</sub>), 147.4 (C<sub>NAr</sub>), 127.5 (CH<sub>Ar</sub>), 124.3 (CH<sub>Ar</sub>), 66.4 (OCH<sub>2</sub>), 66.1 (OCH<sub>2</sub>), 52.8 (NCH<sub>2</sub>), 49.4 (NCH<sub>2</sub>) ppm; **Elemental analysis:** Found: C, 52.34; H, 4.81. Calc. for C<sub>11</sub>H<sub>12</sub>N<sub>2</sub>O<sub>3</sub>S: C, 52.37; H, 4.79%; **IR-ATR:** 3059, 2857, 1591, 1509, 1501, 1476, 1342, 1105, 1232, 1030 cm<sup>-1</sup>.

#### 3-Nitrobenzoic acid thiomorpholide (**2g**)

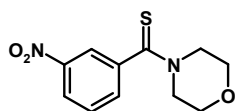

Mp 149-150 °C (from *i*-PrOH/DMF) (lit.,<sup>6</sup> 151 °C); <sup>1</sup>H NMR (DMSO-d<sub>6</sub>, 298 K, 400 MHz): δ<sub>H</sub> = 8.15-8.18 (m, 1H, Ar-H), 8.09 (t, *J*<sub>H-H</sub> = 2.0 Hz, 1H, Ar-H), 7.62-7.71 (m, 2H, Ar-H), 4.28 (t, *J*<sub>H-H</sub> = 4.5 Hz, 2H, CH<sub>2</sub>), 3.77 (t, *J*<sub>H-H</sub> = 4.2 Hz, 2H, CH<sub>2</sub>), 3.52-3.57 (m, 4H, CH<sub>2</sub>) ppm; <sup>13</sup>C NMR (DMSO-d<sub>6</sub>, 298 K, 100 MHz): δ<sub>C</sub> = 195.7 (CS), 148.1 (C<sub>NAr</sub>), 144.0 (C<sub>Ar</sub>), 132.6 (CH<sub>Ar</sub>), 130.6 (CH<sub>Ar</sub>), 123.7 (CH<sub>Ar</sub>), 121.3 (CH<sub>Ar</sub>), 66.4 (OCH<sub>2</sub>), 66.1 (OCH<sub>2</sub>), 52.9 (NCH<sub>2</sub>), 49.7 (NCH<sub>2</sub>) ppm; **Elemental analysis:** Found: C, 52.38; H, 4.83. Calc. for C<sub>11</sub>H<sub>12</sub>N<sub>2</sub>O<sub>3</sub>S: C, 52.37; H, 4.79%; **IR-ATR:** 3072, 2978, 2860, 1523, 1489, 1438, 1348, 1106 cm<sup>-1</sup>.

#### Phenylacetic acid thiomorpholide (**2h**)

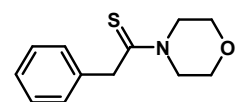

Mp 79 °C (from EtOH) (lit.,<sup>7</sup> 79-80 °C); <sup>1</sup>H NMR (DMSO-d<sub>6</sub>, 298 K, 400 MHz): δ<sub>H</sub> = 7.18-7.30 (m, 5H, Ar-H), 4.28 (s, 2H, ArCH<sub>2</sub>), 4.20 (t, *J*<sub>H-H</sub> = 4.9 Hz, 2H, CH<sub>2</sub>), 3.65 (t, *J*<sub>H-H</sub> = 4.8 Hz, 2H, CH<sub>2</sub>), 3.60 (t, *J*<sub>H-H</sub> = 5.0 Hz, 2H, CH<sub>2</sub>), 3.36 (t, *J*<sub>H-H</sub> = 5.1 Hz, 2H, CH<sub>2</sub>) ppm; <sup>13</sup>C NMR (DMSO-d<sub>6</sub>, 298 K, 100 MHz): δ<sub>C</sub> = 199.3 (CS), 136.9 (C<sub>Ar</sub>), 129.1 (CH<sub>Ar</sub>), 128.5 (CH<sub>Ar</sub>), 127.2 (CH<sub>Ar</sub>), 66.3 (OCH<sub>2</sub>), 66.2 (OCH<sub>2</sub>), 51.2 (NCH<sub>2</sub>), 50.4 (NCH<sub>2</sub>), 49.7 (ArCH<sub>2</sub>) ppm; **Elemental analysis:** Found: C, 65.11; H, 6.85. Calc. for C<sub>12</sub>H<sub>15</sub>NOS: C, 65.12; H, 6.83%; **IR-ATR:** 2963, 2907, 2849, 1603, 1493, 1453, 1111, 1433, 1263, 1033 cm<sup>-1</sup>.

#### 4-Methylphenylacetic acid thiomorpholide (**2i**)

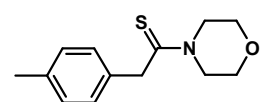

Mp 103-104 °C (from *i*-PrOH) (lit.,<sup>8</sup> 105 °C); <sup>1</sup>H NMR (DMSO-d<sub>6</sub>, 298 K, 400 MHz): δ<sub>H</sub> = 7.18 (d, *J*<sub>H-H</sub> = 8.7 Hz, 2H, Ar-H), 7.09 (d, *J*<sub>H-H</sub> = 8.7 Hz, 2H, Ar-H), 4.22 (s, 2H, ArCH<sub>2</sub>), 4.18 (t, *J*<sub>H-H</sub> = 4.9 Hz, 2H, CH<sub>2</sub>), 3.64 (t, *J*<sub>H-H</sub> = 4.9 Hz, 2H, CH<sub>2</sub>), 3.59 (t, *J*<sub>H-H</sub> = 4.9 Hz, 2H, CH<sub>2</sub>), 3.36 (t, *J*<sub>H-H</sub> = 4.9 Hz, 2H, CH<sub>2</sub>), 2.23 (s, 3H, CH<sub>3</sub>) ppm; <sup>13</sup>C NMR (DMSO-d<sub>6</sub>, 298 K, 100 MHz): δ<sub>C</sub> = 199.6 (CS), 136.3 (C<sub>Ar</sub>CH<sub>2</sub>), 133.8 (C<sub>Ar</sub>CH<sub>3</sub>), 129.7 (CH<sub>Ar</sub>), 128.3 (CH<sub>Ar</sub>), 66.3 (OCH<sub>2</sub>), 66.2 (OCH<sub>2</sub>), 51.1 (NCH<sub>2</sub>), 50.4 (NCH<sub>2</sub>), 49.3 (C<sub>Ar</sub>CH<sub>2</sub>), 21.2 (CH<sub>3</sub>) ppm; **Elemental analysis:** Found: C, 66.32; H, 7.30. Calc. for C<sub>13</sub>H<sub>17</sub>NOS: C, 66.35; H, 7.28%; **IR-ATR:** 2845, 1492, 1429, 1284, 1255, 1106, 1096, 1026, 957 cm<sup>-1</sup>.

#### 4-Biphenylacetic acid thiomorpholide (**2j**)

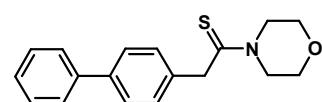

Mp 72-73 °C (from EtOH/DMF) (lit.,<sup>9</sup> 73-74 °C); <sup>1</sup>H NMR (DMSO-d<sub>6</sub>, 298 K, 400 MHz): δ<sub>H</sub> = 7.59-7.63 (m, 4H, Ar-H), 7.30-7.44 (m, 5H, Ar-H), 4.32 (s, 2H, ArCH<sub>2</sub>), 4.21 (t, *J*<sub>H-H</sub> = 4.4 Hz, 2H, CH<sub>2</sub>), 3.71 (t, *J*<sub>H-H</sub> = 4.4 Hz, 2H, CH<sub>2</sub>), 3.62 (t, *J*<sub>H-H</sub> = 5.3 Hz, 2H, CH<sub>2</sub>), 3.43 (t, *J*<sub>H-H</sub> = 5.1 Hz, 2H, CH<sub>2</sub>) ppm; <sup>13</sup>C NMR (DMSO-d<sub>6</sub>, 298 K, 100 MHz): δ<sub>C</sub> = 199.3 (CS), 140.3 (CH<sub>Ar</sub>), 139.0 (C<sub>Ar</sub>), 136.1 (C<sub>Ar</sub>), 129.5 (CH<sub>Ar</sub>), 129.1 (CH<sub>Ar</sub>), 127.9 (C<sub>Ar</sub>), 127.4 (CH<sub>Ar</sub>), 127.1 (CH<sub>Ar</sub>), 66.4 (OCH<sub>2</sub>), 66.2 (OCH<sub>2</sub>), 51.2 (NCH<sub>2</sub>), 50.4 (NCH<sub>2</sub>), 49.2 (CH<sub>2</sub>) ppm; **Elemental analysis:** Found: C, 72.66; H, 6.47. Calc. for C<sub>18</sub>H<sub>19</sub>NOS: C, 72.69; H, 6.44%; **IR-ATR:** 2960, 2914, 2847, 1597, 1496, 1490, 1439, 1102, 1302, 1259 cm<sup>-1</sup>.

#### 4-Methoxyphenylacetic acid thiomorpholide (**2k**)

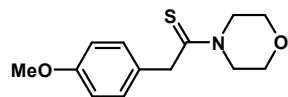

Mp 64 °C (from MeOH) (lit.,<sup>8</sup> 70 °C); <sup>1</sup>H NMR (DMSO-d<sub>6</sub>, 298 K, 400 MHz): δ<sub>H</sub> = 7.22 (d, J<sub>H-H</sub> = 8.7 Hz, 2H, Ar-H), 6.86 (d, J<sub>H-H</sub> = 8.7 Hz, 2H, Ar-H), 4.19 (s, 2H, ArCH<sub>2</sub>), 4.18 (t, J<sub>H-H</sub> = 4.7 Hz, 2H, CH<sub>2</sub>), 3.66 (t, J<sub>H-H</sub> = 4.4 Hz, 2H, CH<sub>2</sub>), 3.59 (t, J<sub>H-H</sub> = 5.0 Hz, 2H, CH<sub>2</sub>), 3.37 (t, J<sub>H-H</sub> = 5.0 Hz, 2H, CH<sub>2</sub>), 3.69 (s, 3H, CH<sub>3</sub>) ppm; <sup>13</sup>C NMR (DMSO-d<sub>6</sub>, 298 K, 100 MHz): δ<sub>C</sub> = 199.8 (CS), 158.5 (CO<sub>Ar</sub>), 129.5 (CH<sub>Ar</sub>), 128.6 (C<sub>Ar</sub>), 114.5 (CH<sub>Ar</sub>), 66.3 (OCH<sub>2</sub>), 66.2 (OCH<sub>2</sub>), 55.5 (OCH<sub>3</sub>), 51.1 (NCH<sub>2</sub>), 50.4 (NCH<sub>2</sub>), 48.8 (CH<sub>2</sub>) ppm; **Elemental analysis:** Found: C, 62.1; H, 6.84. Calc. for C<sub>13</sub>H<sub>17</sub>NO<sub>2</sub>S: C, 62.12; H, 6.82%; **IR-ATR:** 2994, 2854, 2837, 1610, 1580, 1512, 1495, 1108, 1249, 1029 cm<sup>-1</sup>.

#### 4-(Dimethylamino)phenylacetic acid thiomorpholide (**2l**)

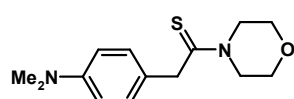

Mp 139-140 °C (from *i*-PrOH) (lit.,<sup>10</sup> 138-140 °C); <sup>1</sup>H NMR (DMSO-d<sub>6</sub>, 298 K, 400 MHz): δ<sub>H</sub> = 7.11 (d, J<sub>H-H</sub> = 8.7 Hz, 2H, Ar-H), 6.64 (d, J<sub>H-H</sub> = 8.7 Hz, 2H, Ar-H), 4.13 (s, 2H, ArCH<sub>2</sub>), 4.16 (t, J<sub>H-H</sub> = 4.9 Hz, 2H, CH<sub>2</sub>), 3.65 (t, J<sub>H-H</sub> = 4.7 Hz, 2H, CH<sub>2</sub>), 3.58 (t, J<sub>H-H</sub> = 5.0 Hz, 2H, CH<sub>2</sub>), 3.35 (t, J<sub>H-H</sub> = 4.9 Hz, 2H, CH<sub>2</sub>), 2.82 (s, 6H, NMe<sub>2</sub>) ppm; <sup>13</sup>C NMR (DMSO-d<sub>6</sub>, 298 K, 100 MHz): δ<sub>C</sub> = 200.3 (CS), 149.8 (CN<sub>Ar</sub>), 129.0 (CH<sub>Ar</sub>), 123.9 (C<sub>Ar</sub>), 113.1 (CH<sub>Ar</sub>), 66.3 (OCH<sub>2</sub>), 66.2 (OCH<sub>2</sub>), 51.1 (NCH<sub>2</sub>), 50.4 (NCH<sub>2</sub>), 48.9 (CH<sub>2</sub>), 40.7 (NCH<sub>3</sub>) ppm; **Elemental analysis:** Found: C, 63.62; H, 7.65. Calc. for C<sub>14</sub>H<sub>20</sub>N<sub>2</sub>OS: C, 63.60; H, 7.62%; **IR-ATR:** 2963, 2846, 2802, 1621, 1527, 1496, 1113, 1433, 1264, 1101 cm<sup>-1</sup>.

#### 1-Naphthylacetic acid thiomorpholide (**2m**)

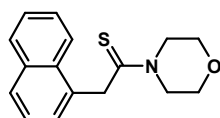

Mp 210-212 °C (from *i*-PrOH) (lit.,<sup>11</sup> 208-210 °C); <sup>1</sup>H NMR (DMSO-d<sub>6</sub>, 298 K, 400 MHz): δ<sub>H</sub> = 7.79-7.99 (m, 3H, Ar-H), 7.43-7.55 (m, 3H, Ar-H), 7.26 (d, J<sub>H-H</sub> = 7.2 Hz, 1H, Ar-H), 4.68 (s, 2H, ArCH<sub>2</sub>), 4.31 (t, J<sub>H-H</sub> = 4.9 Hz, 2H, CH<sub>2</sub>), 3.71 (t, J<sub>H-H</sub> = 4.9 Hz, 2H, CH<sub>2</sub>), 3.57 (t, J<sub>H-H</sub> = 5.3 Hz, 2H, CH<sub>2</sub>), 3.45 (t, J<sub>H-H</sub> = 5.3 Hz, 2H, CH<sub>2</sub>) ppm; <sup>13</sup>C NMR (DMSO-d<sub>6</sub>, 298 K, 100 MHz): δ<sub>C</sub> = 199.6 (CS), 133.9 (C<sub>Ar</sub>CH<sub>2</sub>), 133.1 (CH<sub>Ar</sub>), 131.7 (CH<sub>Ar</sub>), 129.1 (CH<sub>Ar</sub>), 127.7 (C<sub>Ar</sub>), 126.8 (C<sub>Ar</sub>), 126.4 (CH<sub>Ar</sub>), 126.2 (CH<sub>Ar</sub>), 125.3 (CH<sub>Ar</sub>), 124.0 (CH<sub>Ar</sub>), 66.3 (OCH<sub>2</sub>), 66.2 (OCH<sub>2</sub>), 51.1 (NCH<sub>2</sub>), 50.2 (NCH<sub>2</sub>), 46.8 (CH<sub>2</sub>) ppm; **Elemental analysis:** Found: C, 70.85; H, 6.33. Calc. for C<sub>16</sub>H<sub>17</sub>NOS: C, 70.81; H, 6.31%; **IR-ATR:** 3052, 2854, 1596, 1491, 1433, 1111, 1100, 963 cm<sup>-1</sup>.

#### 3-Phenylpropionic acid thiomorpholide (**2n**)

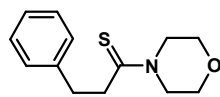

Oil; <sup>1</sup>H NMR (DMSO-d<sub>6</sub>, 298 K, 400 MHz): δ<sub>H</sub> = 7.15-7.27 (m, 5H, Ar-H), 4.17 (t, J<sub>H-H</sub> = 4.5 Hz, 2H, CH<sub>2</sub>), 3.67 (t, J<sub>H-H</sub> = 4.4 Hz, 2H, CH<sub>2</sub>), 3.58 (t, J<sub>H-H</sub> = 5.0 Hz, 2H, CH<sub>2</sub>), 3.41 (t, J<sub>H-H</sub> = 5.2 Hz, 2H, CH<sub>2</sub>), 3.03-3.07 (m, 2H, CH<sub>2</sub>CS), 2.92-2.96 (m, 2H, ArCH<sub>2</sub>) ppm; <sup>13</sup>C NMR (DMSO-d<sub>6</sub>, 298 K, 100 MHz): δ<sub>C</sub> = 201.8 (CS), 141.0 (C<sub>Ar</sub>), 129.1 (CH<sub>Ar</sub>), 128.9 (CH<sub>Ar</sub>), 126.7 (CH<sub>Ar</sub>), 66.4 (OCH<sub>2</sub>), 66.2 (OCH<sub>2</sub>), 50.5 (NCH<sub>2</sub>), 50.2 (NCH<sub>2</sub>), 44.1 (CH<sub>2</sub>CS), 35.4 (PhCH<sub>2</sub>) ppm; **Elemental analysis:** Found: C, 66.33; H, 7.30. Calc. for C<sub>13</sub>H<sub>17</sub>NOS: C, 66.35; H, 7.28%; **IR-ATR:** 3023, 2962, 2916, 2853, 1601, 1479, 1452, 1428, 1273, 1237, 1110 cm<sup>-1</sup>.

#### 3-(4-methylphenyl)propionic acid thiomorpholide (**2o**)

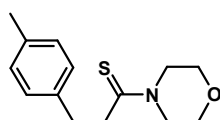

Mp 101-102 °C (from *i*-PrOH) (lit.,<sup>12</sup> 102-104 °C); <sup>1</sup>H NMR (DMSO-d<sub>6</sub>, 298 K, 400 MHz): δ<sub>H</sub> = 7.04-7.11 (m, 4H, Ar-H), 4.16 (t, J<sub>H-H</sub> = 4.8 Hz, 2H, CH<sub>2</sub>), 3.67 (t, J<sub>H-H</sub> = 4.8 Hz, 2H, CH<sub>2</sub>), 3.58 (t, J<sub>H-H</sub> = 5.0 Hz, 2H, CH<sub>2</sub>), 3.43 (t, J<sub>H-H</sub> = 5.2 Hz, 2H, CH<sub>2</sub>), 2.99-3.03 (m, 2H, CH<sub>2</sub>CS), 2.85-2.88 (m, 2H, ArCH<sub>2</sub>), 2.23 (s, 3H, CH<sub>3</sub>) ppm; <sup>13</sup>C NMR (DMSO-d<sub>6</sub>, 298 K, 100 MHz): δ<sub>C</sub> = 201.2 (CS), 137.8 (C<sub>Ar</sub>CH<sub>2</sub>), 135.7 (C<sub>Ar</sub>CH<sub>3</sub>), 129.4 (CH<sub>Ar</sub>), 128.9 (CH<sub>Ar</sub>), 66.4 (OCH<sub>2</sub>), 66.2 (OCH<sub>2</sub>), 50.5 (NCH<sub>2</sub>), 50.1 (NCH<sub>2</sub>), 44.4 (CH<sub>2</sub>CS), 34.9 (ArCH<sub>2</sub>), 21.2 (ArCH<sub>3</sub>) ppm; **Elemental analysis:** Found: C, 67.40; H, 7.71. Calc. for C<sub>14</sub>H<sub>19</sub>NOS: C, 67.43; H, 7.68%; **IR-ATR:** 2962, 2916, 2847, 1512, 1484, 1462, 1427, 1284, 1236, 1110, 1095 cm<sup>-1</sup>.



### 3-(4-methoxyphenyl)propionic acid thiomorpholide (**2p**)

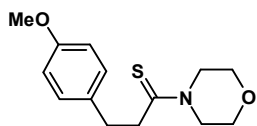

Mp 90-91 °C (from MeOH) (lit.,<sup>12</sup> 89-90 °C); <sup>1</sup>H NMR (DMSO-d<sub>6</sub>, 298 K, 400 MHz): δ<sub>H</sub> = 7.11-7.15 (m, 2H, Ar-H), 6.79-6.83 (m, 2H, Ar-H), 4.16 (t, J<sub>H-H</sub> = 4.8 Hz, 2H, CH<sub>2</sub>), 3.68 (s, 3H, OMe), 3.67 (t, J<sub>H-H</sub> = 6 Hz, 2H, CH<sub>2</sub>), 3.58 (t, J<sub>H-H</sub> = 5.2 Hz, 2H, CH<sub>2</sub>), 3.43 (t, J<sub>H-H</sub> = 5.2 Hz, 2H, CH<sub>2</sub>), 2.98-3.02 (m, 2H, CH<sub>2</sub>CS), 2.83-2.87 (m, 2H, ArCH<sub>2</sub>) ppm; <sup>13</sup>C NMR (DMSO-d<sub>6</sub>, 298 K, 100 MHz): δ<sub>C</sub> = 201.8 (CS), 158.3 (CO<sub>Ar</sub>), 132.8 (C<sub>Ar</sub>), 129.9 (CH<sub>Ar</sub>), 114.3 (CH<sub>Ar</sub>), 66.4 (OCH<sub>2</sub>), 66.2 (OCH<sub>2</sub>), 55.5 (OCH<sub>3</sub>), 50.4 (NCH<sub>2</sub>), 50.1 (NCH<sub>2</sub>), 44.6 (CH<sub>2</sub>CS), 34.4 (ArCH<sub>2</sub>) ppm; **Elemental analysis:** Found: C, 63.32; H, 7.25. Calc. for C<sub>14</sub>H<sub>19</sub>NO<sub>2</sub>S: C, 63.36; H, 7.22%; **IR-ATR:** 2969, 2862, 2827, 1608, 1511, 1484, 1431, 1245, 1113, 1093, 983 cm<sup>-1</sup>.

### N-(4-Nitrophenyl)phenylmethanimine (**4a**)

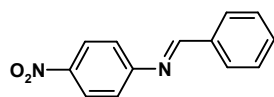

Mp 140-141 °C (from *i*-PrOH) (lit.,<sup>13</sup> 144 °C); <sup>1</sup>H NMR (DMSO-d<sub>6</sub>, 298 K, 400 MHz): δ<sub>H</sub> = 8.62 (s, 1H, CH), 8.22-8.26 (m, 2H, Ar-H), 7.92-7.95 (m, 2H, Ar-H), 7.49-7.58 (m, 3H, Ar-H), 7.38-7.42 (m, 2H, Ar-H) ppm; <sup>13</sup>C NMR (DMSO-d<sub>6</sub>, 298 K, 100 MHz): δ<sub>C</sub> = 164.4 (CHN), 158.1 (C<sub>Ar</sub>N), 145.5 (C<sub>Ar</sub>NO<sub>2</sub>), 135.9 (C<sub>Ar</sub>CH), 132.9 (C<sub>Ar</sub>H), 129.8 (C<sub>Ar</sub>H), 129.5 (C<sub>Ar</sub>H), 125.5 (C<sub>Ar</sub>H), 122.4 (C<sub>Ar</sub>H) ppm; **Elemental analysis:** Found: C, 69.07; H, 4.50. Calc. for C<sub>13</sub>H<sub>10</sub>N<sub>2</sub>O<sub>2</sub>: C, 69.02; H, 4.46%; **IR-ATR:** 1623, 1596, 1570, 1506, 1475, 1451, 1317, 1285, 1191, 1162, 1102 cm<sup>-1</sup>.

### N-(4-Nitrophenyl)phenylmethanimine (**4b**)

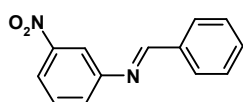

Mp 65-66 °C (from *i*-PrOH) (lit.,<sup>13</sup> 66 °C); <sup>1</sup>H NMR (DMSO-d<sub>6</sub>, 298 K, 400 MHz): δ<sub>H</sub> = 8.72 (s, 1H, CH), 8.06-8.09 (m, 1H, Ar-H), 8.03-8.04 (m, 1H, Ar-H), 7.94-7.96 (m, 2H, Ar-H), 7.66-7.72 (m, 2H, Ar-H), 7.49-7.56 (m, 3H, Ar-H) ppm; <sup>13</sup>C NMR (DMSO-d<sub>6</sub>, 298 K, 100 MHz): δ<sub>C</sub> = 164.2 (CHN), 153.1 (C<sub>Ar</sub>N), 149.1 (C<sub>Ar</sub>NO<sub>2</sub>), 136.1 (C<sub>Ar</sub>CH), 132.7 (C<sub>Ar</sub>H), 131.2 (C<sub>Ar</sub>H), 129.6 (C<sub>Ar</sub>H), 129.5 (C<sub>Ar</sub>H), 128.8 (C<sub>Ar</sub>H), 120.9 (C<sub>Ar</sub>H), 115.8 (C<sub>Ar</sub>H) ppm; **Elemental analysis:** Found: C, 69.00; H, 4.39. Calc. for C<sub>13</sub>H<sub>10</sub>N<sub>2</sub>O<sub>2</sub>: C, 69.02; H, 4.46%; **IR-ATR:** 1629, 1577, 1508, 1470, 1453, 1349, 1312, 1193, 1172, 1073 cm<sup>-1</sup>.

1. T.B. Nguyen, L. Ermolenko and A. Al-Mourabit, *Org. Lett.*, **2012**, *14* (16), 4274–4277. <https://doi.org/10.1021/ol3020368>
2. B. Kaboudin, V. Yarahmadi, J. Kato and T. Yokomatsu, *RSC Adv.*, **2013**, *3*, 6435-6441. <https://doi.org/10.1039/C3RA23414B>
3. V.V. Kul'ganek and L.A. Yanovskaya, *Russ. Chem. Bull.*, **1979**, *28*, 2402–2403. <https://doi.org/10.1007/BF00951723>
4. S.D. Fazylov, O.A. Nurkenov, Zh. S. Akhmetkarimova and D. R. Zhienbaeva, *Russ. J. Gen. Chem.*, **2012**, *82*, 781–782. <https://doi.org/10.1134/S1070363212040317>
5. H.F. Agnimonhan, L.A. Ahoussi, B. Glinma, J.M. Kohoudé, F.A. Gbaguidi, S.D.S. Kpoviessi, J. Poupaert and G.C. Accrombessi, *Org. Chem.: Curr. Res.*, **6**, 2, 180. <https://doi.org/10.4172/2161-0401.1000180>
6. R. Mayer, H. Viola, J. Reichert and W. Krause, *J. Prakt. Chem.*, **1978**, *320*, 313-323. <https://doi.org/10.1002/prac.19783200220>
7. W.-W. Liu, Y.-Q. Zhao, R.-B. Xu, L.-J. Tang and H.-W. Hu, *Chin. J. Chem.*, **2006**, *24*, 1472-1475. <https://doi.org/10.1002/cjoc.200690278>
8. M.F. Kosterina, Y.Y. Morzherin, A.V. Tkachev, T. V. Rybalova, Yu. V. Gatilov and V. A. Bakulev, *Russ. Chem. Bull.*, **2002**, *51*, 653–658. <https://doi.org/10.1023/A:1015868201847>
9. J.H. Poupaert, S. Duarte, E. Colacino, P. Depreux, Ch.R. McCurdy and D.L. Lambert, *Phosphorus Sulfur Relat. Elem.*, **2004**, *179*, 10, 1959-1973. <https://doi.org/10.1080/10426500490466995>
10. R.W.J. Carney and G. Stevens, *GE Pat.*, **1969**, 1913742.

11. F.M. Moghaddam, H.Z. Boeini, M. Bagheri, P. Rüedi and A. Linden, *J. Sulfur Chem.*, 2005, **26**, 3, 245-250. <https://doi.org/10.1080/00268970500247680>
12. H. Braeuniger, *Pharmazie*, **1977**, 32 (3), 150-154.
13. Lakshmy Ravishankar , Siddhartha A. Patwe , Nehal Gosarani & Aparajita Roy. Cerium(III)-Catalyzed Synthesis of Schiff Bases: A Green Approach. *Synth. Commun.*, **2010**, 40 (21), 3177-3180. <https://doi.org/10.1080/00397910903370725>

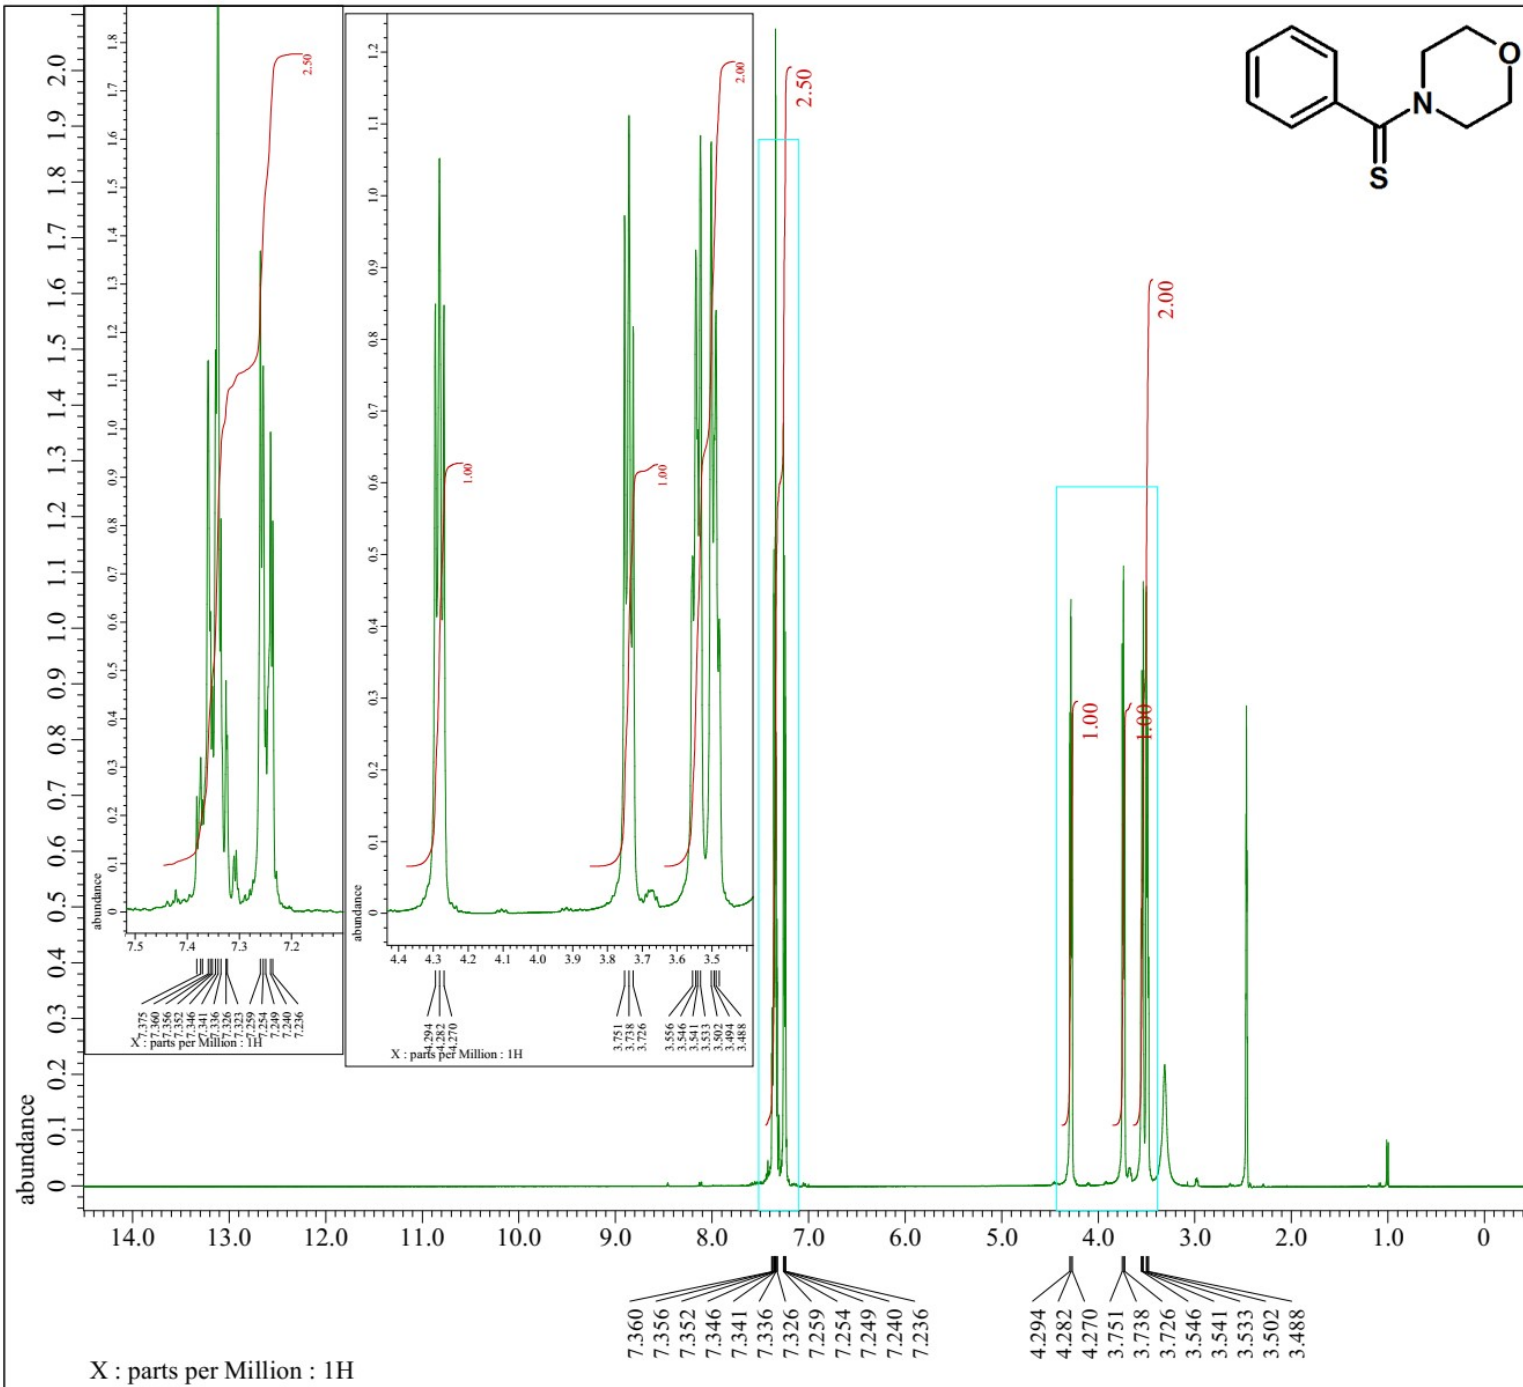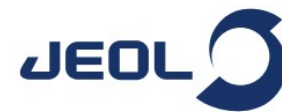

```

---- PROCESSING PARAMETERS ----
sexp( 0.2[Hz], 0.0[s] )
trapezoid( 0[%], 0[%], 80[%], 100[%] )
zerofill( 1, TRUE )
fft( 1, TRUE, TRUE )
machinephase
ppm
Получено из: MED_1H_C6H5CSMorph-1.jdf

```

```

Filename      = MED_1H_C6H5CSMorph-2.jdf
Author       = delta
Experiment   = single_pulse.ex2
Sample_Id    = MED_C6H5CSMorph
Solvent      = DMSO-D6
Actual_Start_Time = 11-JUL-2023 16:22:11
Revision_Time   = 12-JUL-2023 17:56:50

Comment      = single_pulse
Data_Format  = 1D COMPLEX
Dim_Size     = 26214
X_Domain     = 1H
Dim_Title    = 1H
Dim_Units    = [ppm]
Dimensions   = X
Site         = ECX 400
Spectrometer = JNM-ECX400

Field_Strength = 9.389766[T] (400[MHz])
X_Acq_Duration = 4.36731904[s]
X_Domain      = 1H
X_Freq       = 399.78219838[MHz]
X_Offset     = 7[ppm]
X_Points     = 32768
X_Prescans   = 1
X_Resolution = 0.22897343[Hz]
X_Sweep      = 7.5030012[kHz]
Irr_Domain   = 1H
Irr_Freq     = 399.78219838[MHz]
Irr_Offset   = 5[ppm]
Tri_Domain   = 1H
Tri_Freq     = 399.78219838[MHz]
Tri_Offset   = 5[ppm]
Clipped      = FALSE
Scans        = 8
Total_Scans  = 8

Relaxation_Delay = 5[s]
Recvr_Gain       = 28
Temp_Get         = 0[dC]
X_90_Width      = 5.5[us]
X_Acq_Time       = 4.36731904[s]
X_Angle          = 45[deg]
X_Atn            = 3.5[dB]
X_Pulse          = 2.75[us]
Irr_Mode         = Off
Tri_Mode         = Off
Dante_Presat     = FALSE

```



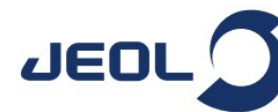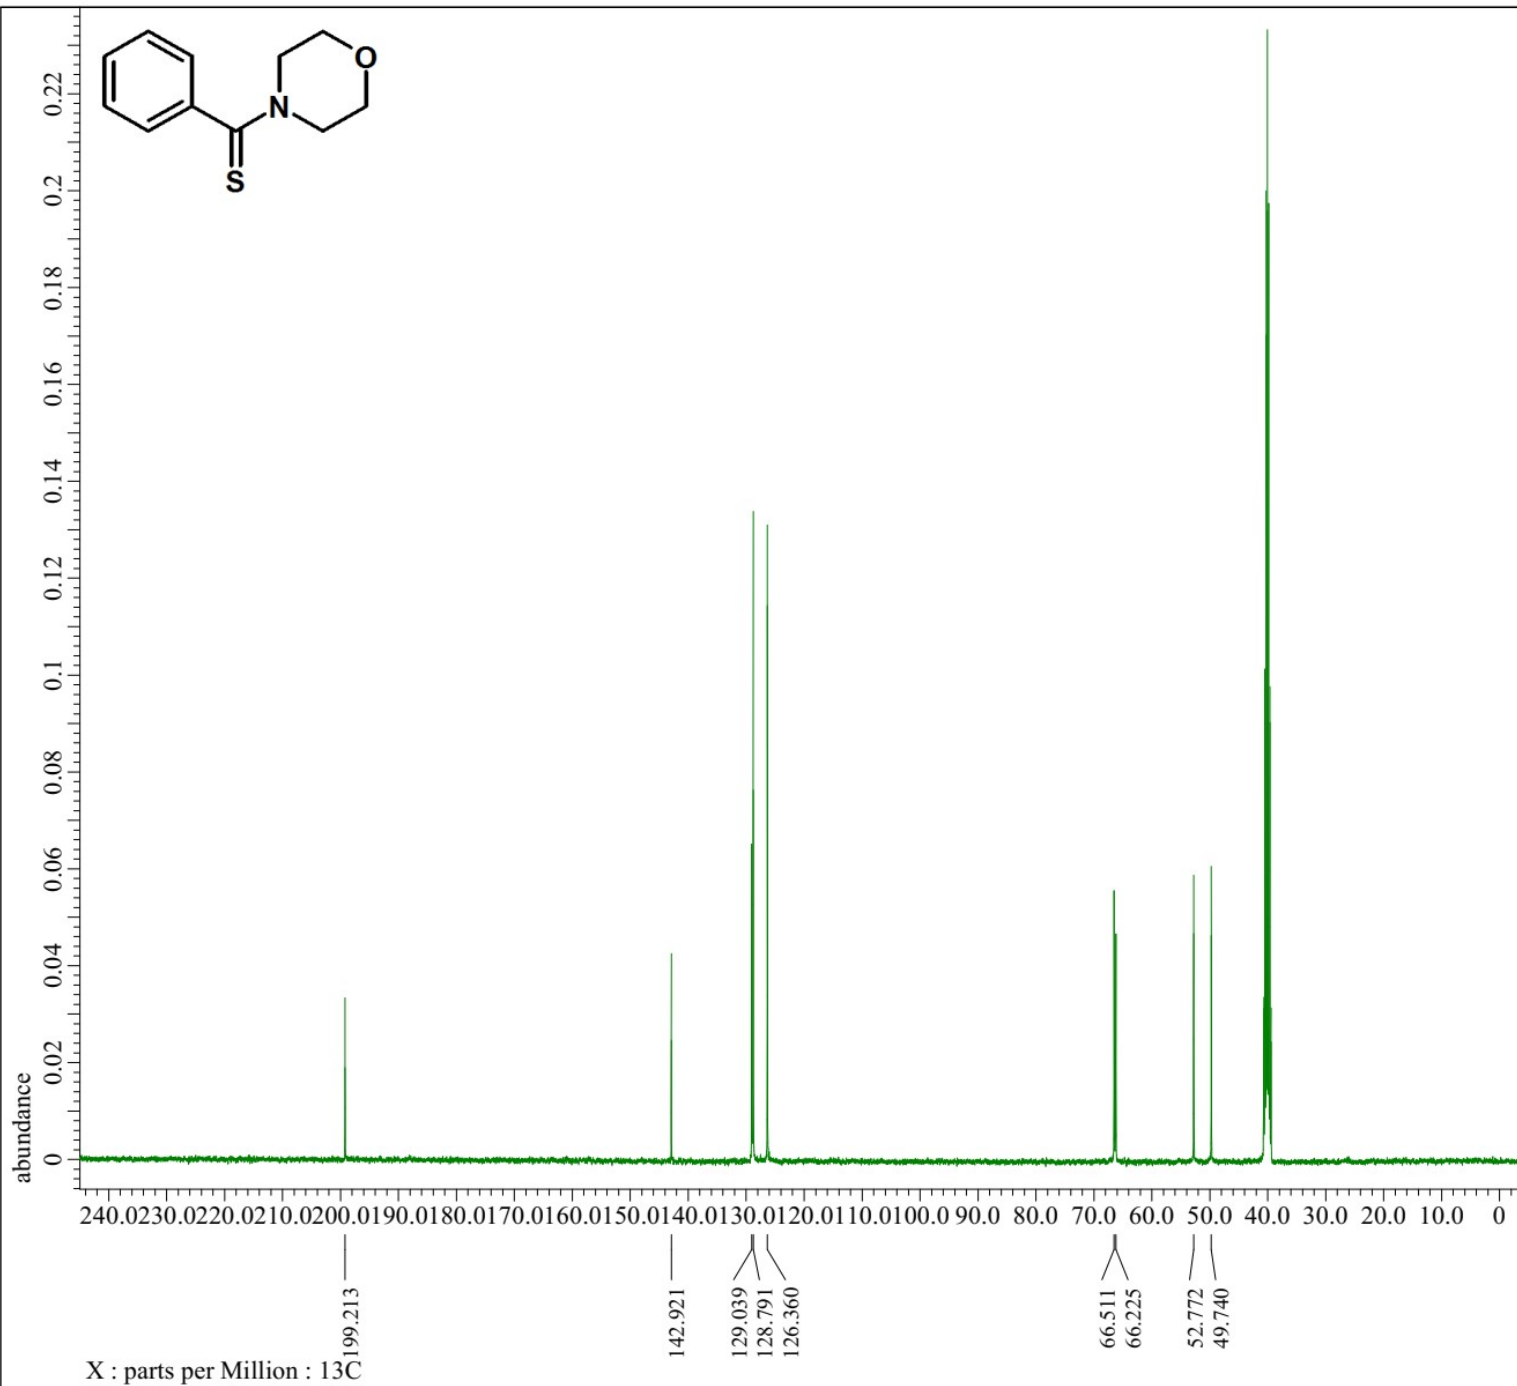

---- PROCESSING PARAMETERS ----  
sexp( 2.0[Hz], 0.0[s] )  
trapezoid( 0[%], 0[%], 80[%], 100[%] )  
zerofill( 1, TRUE )  
fft( 1, TRUE, TRUE )  
machinephase  
ppm

Получено из: MED\_13C\_C6H5CSMorph-1.jdf

Filename = MED\_13C\_C6H5CSMorph-2.jdf  
Author = delta  
Experiment = single\_pulse\_dec  
Sample\_Id = MED\_C6H5CSMorph  
Solvent = DMSO-D6  
Actual\_Start\_Time = 11-JUL-2023 16:24:14  
Revision\_Time = 12-JUL-2023 18:00:22

Comment = single pulse decoupled ga  
Data\_Format = 1D COMPLEX  
Dim\_Size = 26214  
X\_Domain = 13C  
Dim\_Title = 13C  
Dim\_Units = [ppm]  
Dimensions = X  
Site = ECX 400  
Spectrometer = JNM-ECX400

Field\_Strength = 9.389766[T] (400[MHz])  
X\_Acq\_Duration = 1.04333312[s]  
X\_Domain = 13C  
X\_Freq = 100.52530333[MHz]  
X\_Offset = 120[ppm]  
X\_Points = 32768  
X\_Prescans = 4  
X\_Resolution = 0.95846665[Hz]  
X\_Sweep = 31.40703518[kHz]  
Irr\_Domain = 1H  
Irr\_Freq = 399.78219838[MHz]  
Irr\_Offset = 5[ppm]  
Clipped = FALSE  
Scans = 4000  
Total\_Scans = 4000

Relaxation\_Delay = 2[s]  
Recvr\_Gain = 46  
Temp\_Get = 0[dC]  
X\_90\_Width = 13.87[us]  
X\_Acq\_Time = 1.04333312[s]  
X\_Angle = 30[deg]  
X\_Atn = 5.2[dB]  
X\_Pulse = 4.62333333[us]  
Irr\_Atn\_Dec = 29.907[dB]  
Irr\_Atn\_Noie = 29.907[dB]  
Irr\_Noie = WALTZ  
Decoupling = TRUE  
Initial\_Wait = 1[s]  
Noie = TRUE

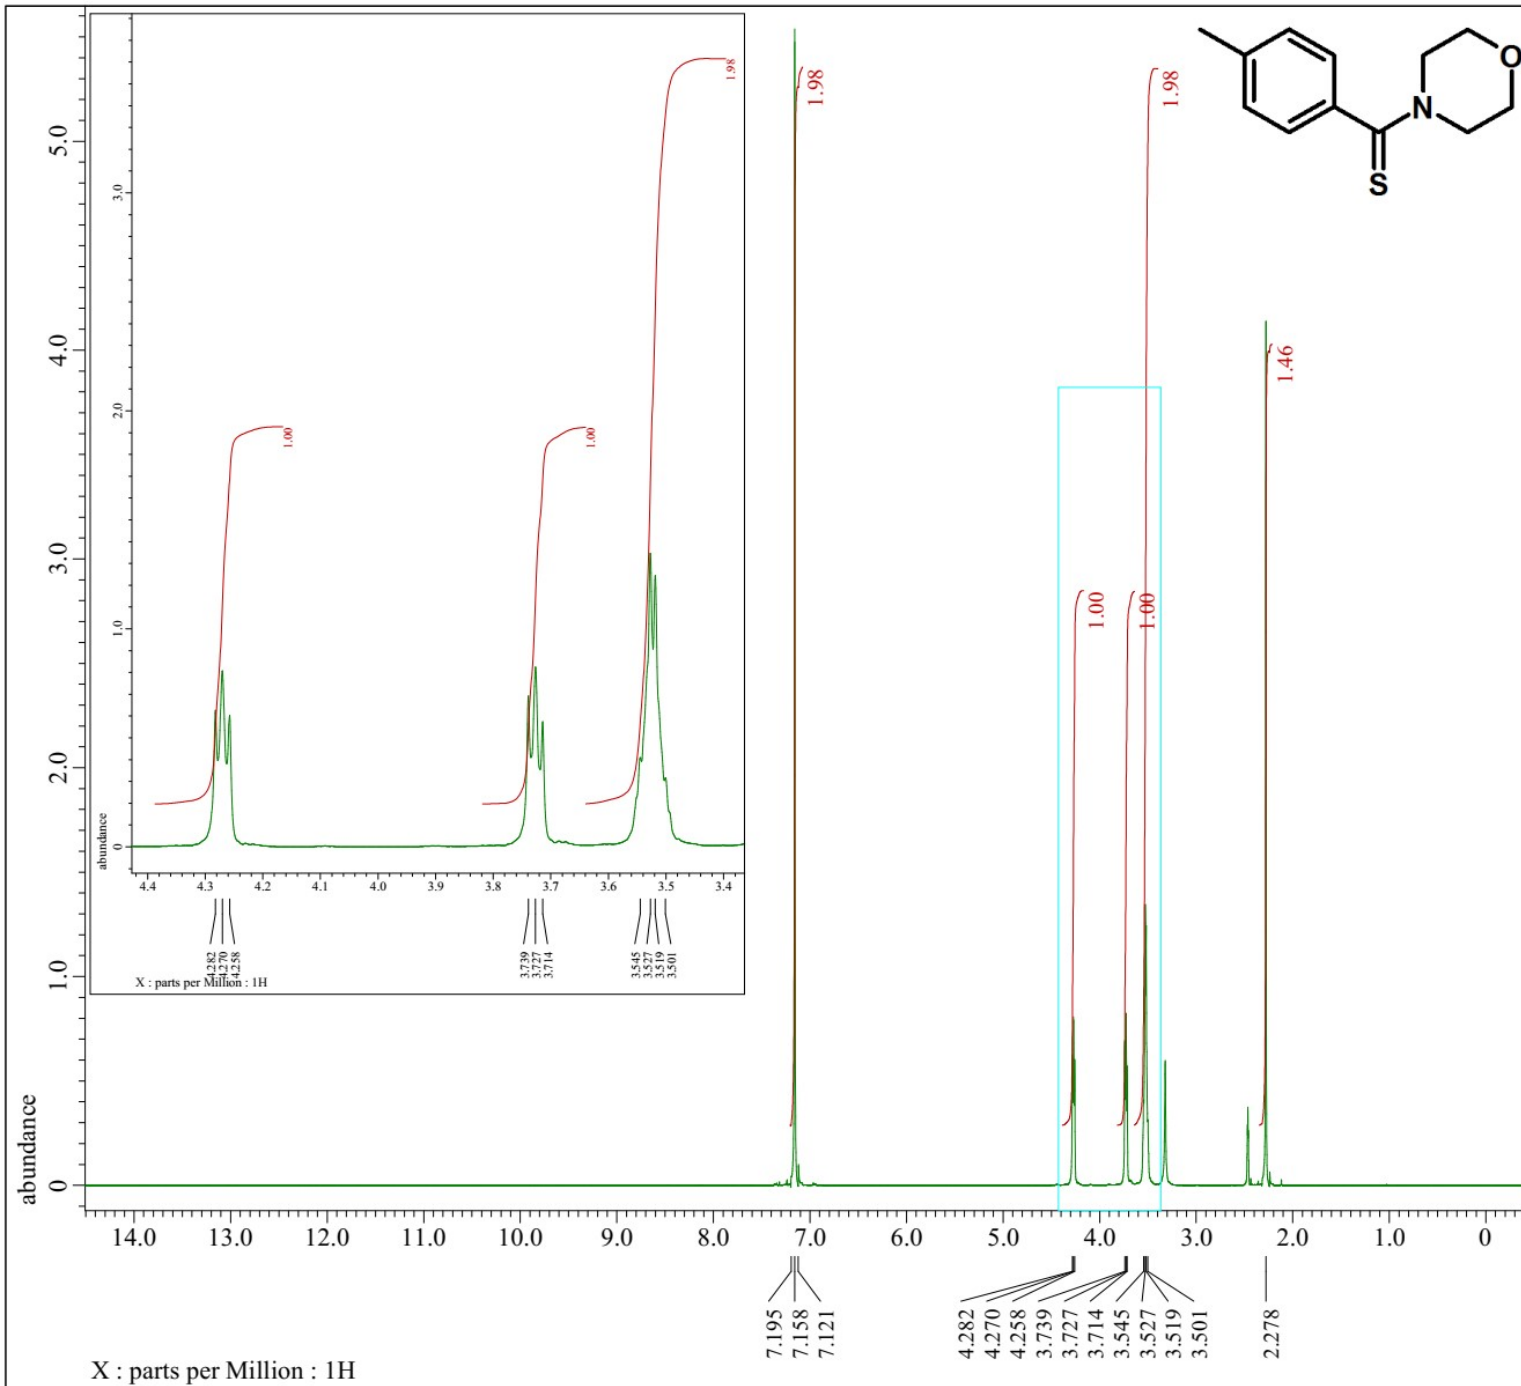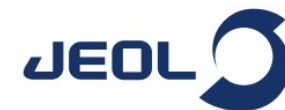

```

---- PROCESSING PARAMETERS ----
sexp( 0.2[Hz], 0.0[s] )
trapezoid( 0[%], 0[%], 80[%], 100[%] )
zerofill( 1, TRUE )
fft( 1, TRUE, TRUE )
machinephase
ppm
  
```

Получено из: MED\_1H\_4-MeC6H4CSMorph-1.jdf

```

Filename      = MED_1H_4-MeC6H4CSMorph-2.
Author        = delta
Experiment     = single_pulse.ex2
Sample Id     = MED 4-MeC6H4CSMorph
Solvent       = DMSO-D6
Actual_Start_Time = 11-JUL-2023 19:51:54
Revision_Time  = 12-JUL-2023 18:23:14
  
```

```

Comment       = single_pulse
Data_Format   = 1D COMPLEX
Dim Size      = 26214
X_Domain     = 1H
Dim Title     = 1H
Dim Units     = [ppm]
Dimensions    = X
Site          = ECX 400
Spectrometer  = JNM-ECX400
  
```

```

Field Strength = 9.389766[T] (400[MHz])
X_Acq_Duration = 4.36731904[s]
X_Domain       = 1H
X_Freq         = 399.78219838[MHz]
X_Offset       = 7[ppm]
X_Points       = 32768
X_Prescans     = 1
X_Resolution   = 0.22897343[Hz]
X_Sweep        = 7.5030012[kHz]
Irr_Domain     = 1H
Irr_Freq       = 399.78219838[MHz]
Irr_Offset     = 5[ppm]
Tri_Domain     = 1H
Tri_Freq       = 399.78219838[MHz]
Tri_Offset     = 5[ppm]
Clipped        = FALSE
Scans          = 8
Total_Scans    = 8
  
```

```

Relaxation_Delay = 5[s]
Recvr_Gain       = 22
Temp_Get         = 0[dC]
X_90_Width      = 5.5[us]
X_Acq_Time       = 4.36731904[s]
X_Angle         = 45[deg]
X_Atn           = 3.5[dB]
X_Pulse         = 2.75[us]
Irr_Mode        = Off
Tri_Mode        = Off
Dante_Presat    = FALSE
  
```

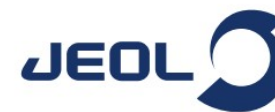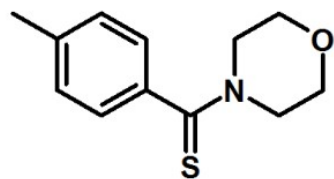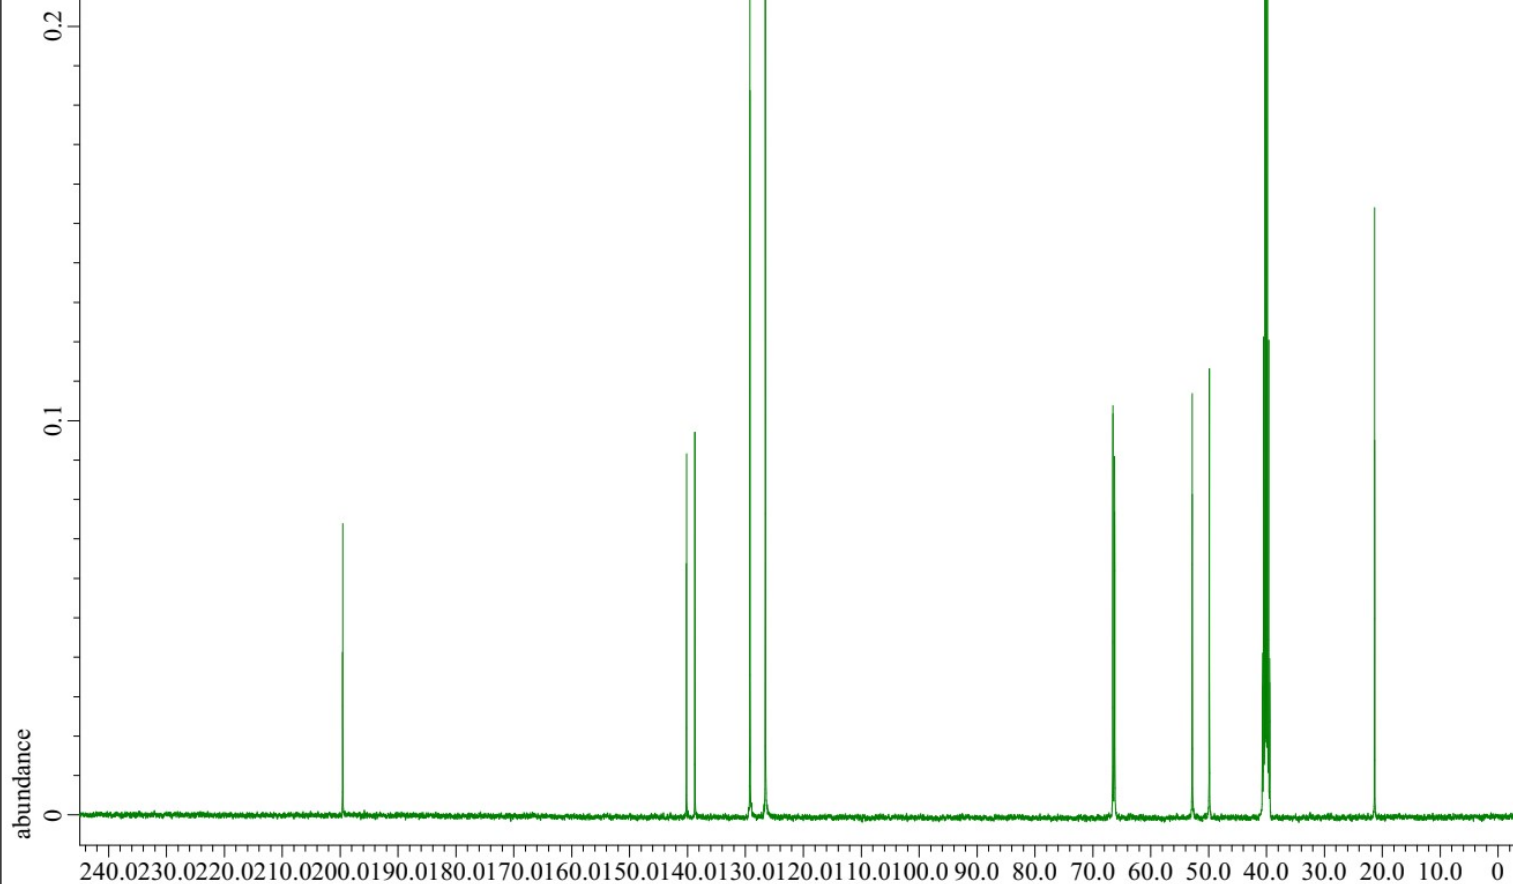

X : parts per Million : 13C

```
---- PROCESSING PARAMETERS ----
sexp( 2.0[Hz], 0.0[s] )
trapezoid( 0[%], 0[%], 80[%], 100[%] )
zerofill( 1, TRUE )
fft( 1, TRUE, TRUE )
machinephase
ppm
```

Получено из: MED\_13C\_4-MeC6H4CSMorph-1.jdf

```
Filename      = MED_13C_4-MeC6H4CSMorph-2
Author        = delta
Experiment    = single_pulse_dec
Sample_Id     = MED_4-MeC6H4CSMorph
Solvent       = DMSO-D6
Actual_Start_Time = 11-JUL-2023 19:53:56
Revision_Time  = 12-JUL-2023 18:27:42
```

```
Comment       = single pulse decoupled ga
Data_Format   = 1D COMPLEX
Dim_Size      = 26214
X_Domain      = 13C
Dim_Title     = 13C
Dim_Units     = [ppm]
Dimensions    = X
Site          = ECX 400
Spectrometer  = JNM-ECX400
```

```
Field_Strength = 9.389766[T] (400[MHz])
X_Acq_Duration = 1.04333312[s]
X_Domain       = 13C
X_Freq         = 100.52530333[MHz]
X_Offset       = 120[ppm]
X_Points       = 32768
X_Prescans     = 4
X_Resolution   = 0.95846665[Hz]
X_Sweep        = 31.40703518[kHz]
Irr_Domain     = 1H
Irr_Freq       = 399.78219838[MHz]
Irr_Offset     = 5[ppm]
Clipped        = FALSE
Scans          = 4000
Total_Scans    = 4000
```

```
Relaxation_Delay = 2[s]
Recvr_Gain       = 48
Temp_Get         = 0[dC]
X_90_Width       = 13.87[us]
X_Acq_Time       = 1.04333312[s]
X_Angle          = 30[deg]
X_Atn            = 5.2[dB]
X_Pulse          = 4.62333333[us]
Irr_Atn_Dec      = 29.907[dB]
Irr_Atn_Noise   = 29.907[dB]
Irr_Noise        = WALTZ
Decoupling       = TRUE
Initial_Wait     = 1[s]
Noe              = TRUE
```

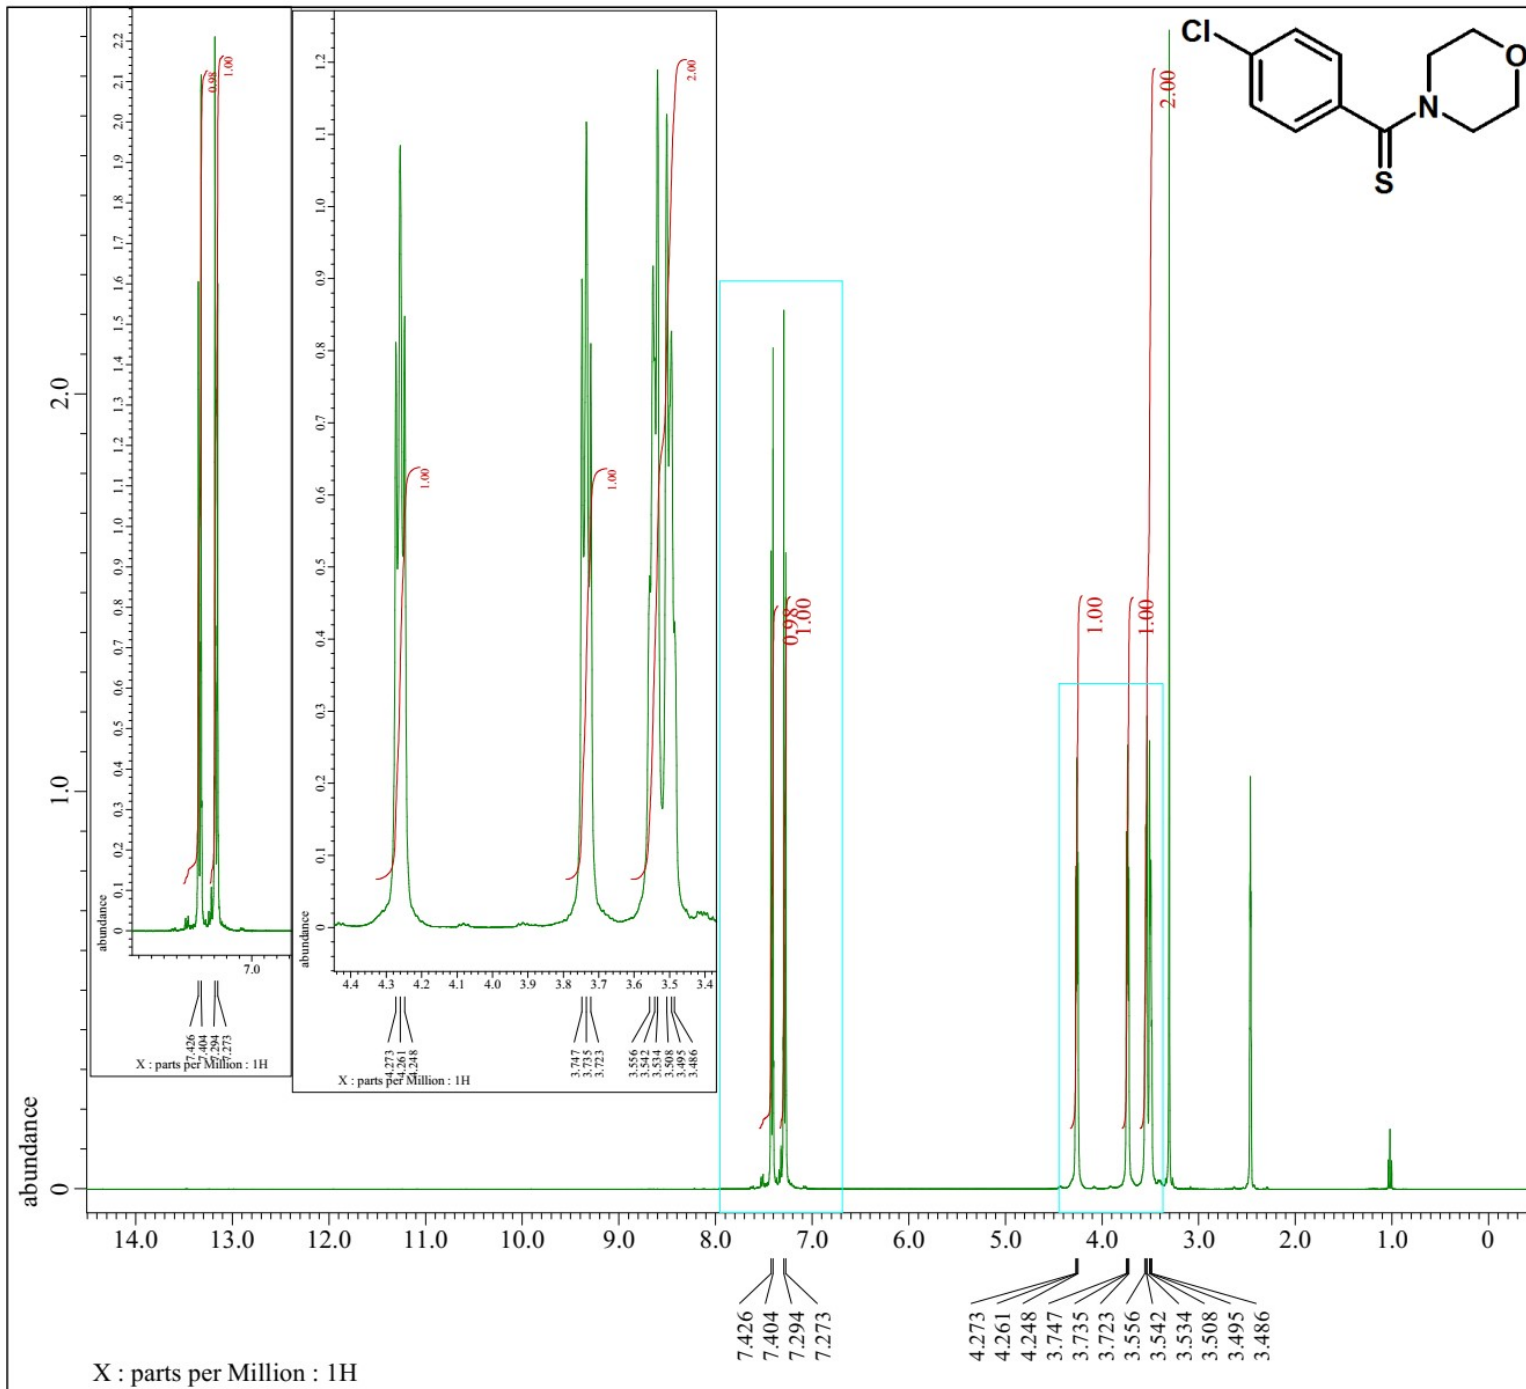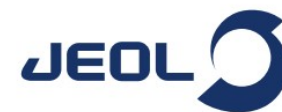

---- PROCESSING PARAMETERS ----  
 sexp( 0.2[Hz], 0.0[s] )  
 trapezoid( 0[%], 0[%], 80[%], 100[%] )  
 zerofill( 1, TRUE )  
 fft( 1, TRUE, TRUE )  
 machinephase  
 ppm  
 Получено из: MED\_1H\_4-ClC6H4CSMorph-1.jdf

Filename = MED\_1H\_4-ClC6H4CSMorph-2.  
 Author = delta  
 Experiment = single\_pulse.ex2  
 Sample\_Id = MED\_4-ClC6H4CSMorph  
 Solvent = DMSO-D6  
 Actual\_Start\_Time = 10-JUL-2023 22:54:05  
 Revision\_Time = 11-JUL-2023 12:59:23

Comment = single\_pulse  
 Data\_Format = 1D\_COMPLEX  
 Dim\_Size = 26214  
 X\_Domain = 1H  
 Dim\_Title = 1H  
 Dim\_Units = [ppm]  
 Dimensions = X  
 Site = ECX 400  
 Spectrometer = JNM-ECX400

Field\_Strength = 9.389766[T] (400[MHz])  
 X\_Acq\_Duration = 4.36731904[s]  
 X\_Domain = 1H  
 X\_Freq = 399.78219838[MHz]  
 X\_Offset = 7[ppm]  
 X\_Points = 32768  
 X\_Prescans = 1  
 X\_Resolution = 0.22897343[Hz]  
 X\_Sweep = 7.5030012[kHz]  
 Irr\_Domain = 1H  
 Irr\_Freq = 399.78219838[MHz]  
 Irr\_Offset = 5[ppm]  
 Tri\_Domain = 1H  
 Tri\_Freq = 399.78219838[MHz]  
 Tri\_Offset = 5[ppm]  
 Clipped = FALSE  
 Scans = 8  
 Total\_Scans = 8

Relaxation\_Delay = 5[s]  
 Recvr\_Gain = 28  
 Temp\_Get = 0[dC]  
 X\_90\_Width = 5.5[us]  
 X\_Acq\_Time = 4.36731904[s]  
 X\_Angle = 45[deg]  
 X\_Atn = 3.5[dB]  
 X\_Pulse = 2.75[us]  
 Irr\_Mode = Off  
 Tri\_Mode = Off  
 Dante\_Presat = FALSE

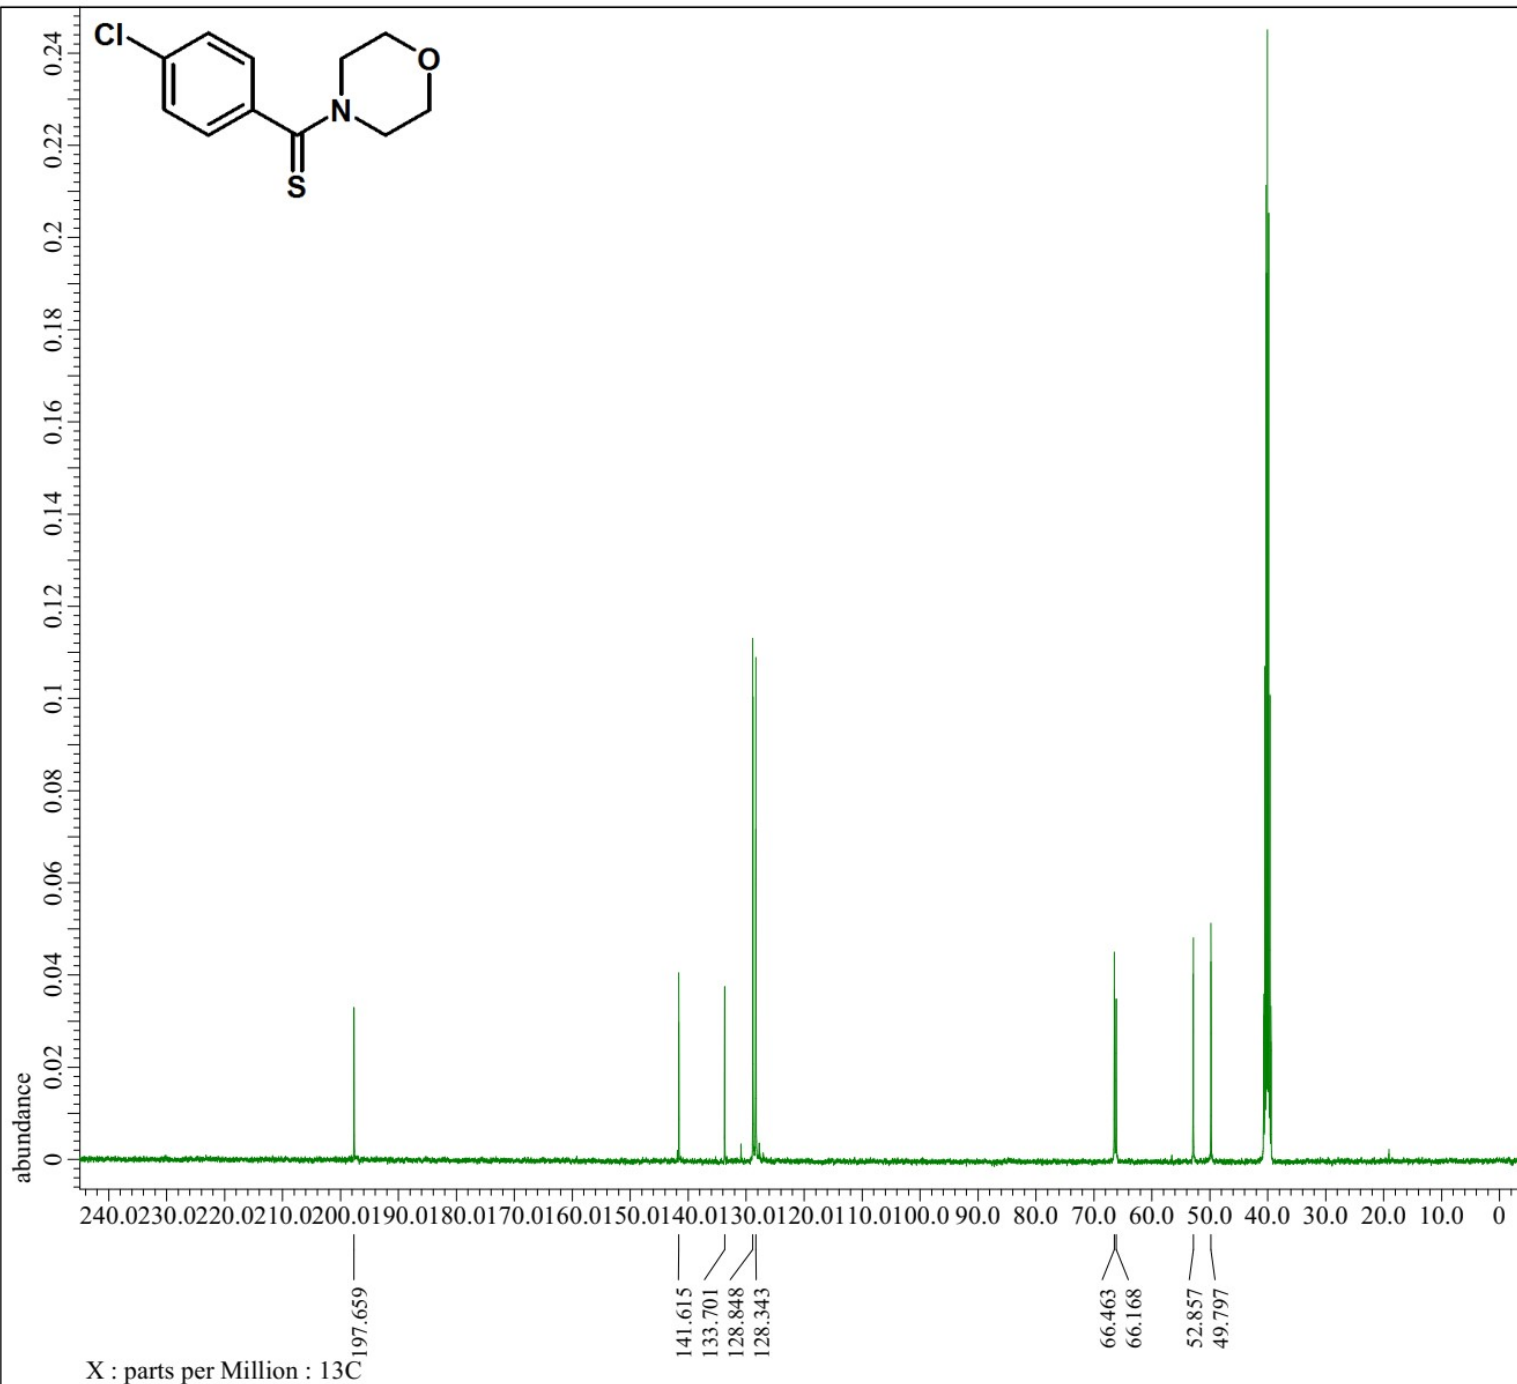

---- PROCESSING PARAMETERS ----  
sexp( 2.0[Hz], 0.0[s] )  
trapezoid( 0[%], 0[%], 80[%], 100[%] )  
zerofill( 1, TRUE )  
fft( 1, TRUE, TRUE )  
machinephase  
ppm

Получено из: MED\_13C\_4-ClC6H4CSMorph-1.jdf

Filename = MED\_13C\_4-ClC6H4CSMorph-2  
Author = delta  
Experiment = single\_pulse\_dec  
Sample\_Id = MED\_4-ClC6H4CSMorph  
Solvent = DMSO-D6  
Actual\_Start\_Time = 10-JUL-2023 22:56:07  
Revision\_Time = 11-JUL-2023 12:42:40

Comment = single pulse decoupled ga  
Data\_Format = 1D COMPLEX  
Dim\_Size = 26214  
X\_Domain = 13C  
Dim\_Title = 13C  
Dim\_Units = [ppm]  
Dimensions = X  
Site = ECX 400  
Spectrometer = JNM-ECX400

Field\_Strength = 9.389766[T] (400[MHz])  
X\_Acq\_Duration = 1.04333312[s]  
X\_Domain = 13C  
X\_Freq = 100.52530333[MHz]  
X\_Offset = 120[ppm]  
X\_Points = 32768  
X\_Prescans = 4  
X\_Resolution = 0.95846665[Hz]  
X\_Sweep = 31.40703518[kHz]  
Irr\_Domain = 1H  
Irr\_Freq = 399.78219838[MHz]  
Irr\_Offset = 5[ppm]  
Clipped = FALSE  
Scans = 4000  
Total\_Scans = 4000

Relaxation\_Delay = 2[s]  
Recvr\_Gain = 46  
Temp\_Get = 0[dC]  
X\_90\_Width = 13.87[us]  
X\_Acq\_Time = 1.04333312[s]  
X\_Angle = 30[deg]  
X\_Atn = 5.2[dB]  
X\_Pulse = 4.62333333[us]  
Irr\_Atn\_Dec = 29.907[dB]  
Irr\_Atn\_Noie = 29.907[dB]  
Irr\_Noie = WALTZ  
Decoupling = TRUE  
Initial\_Wait = 1[s]  
Noie = TRUE



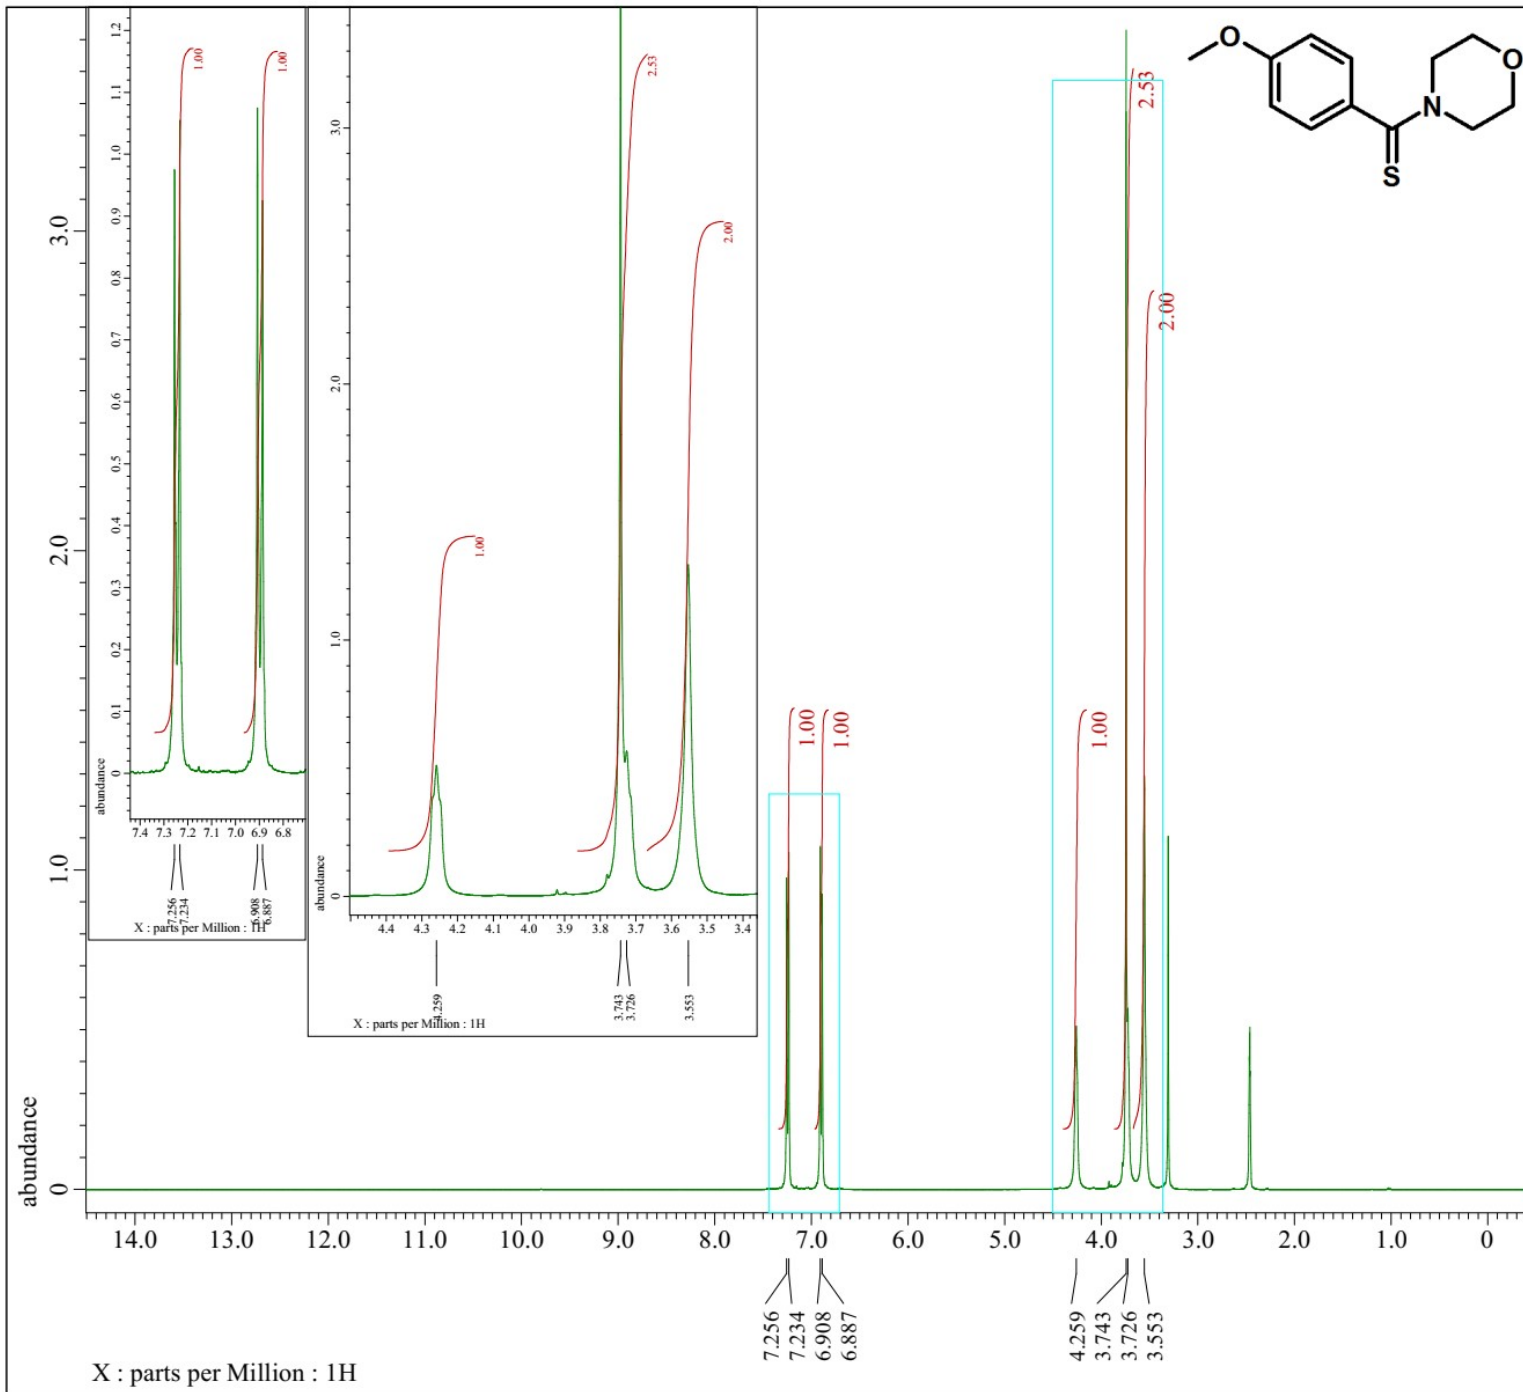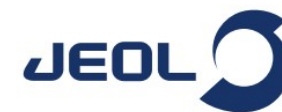

---- PROCESSING PARAMETERS ----  
 sexp( 0.2[Hz], 0.0[s] )  
 trapezoid( 0[%], 0[%], 80[%], 100[%] )  
 zerofill( 1, TRUE )  
 fft( 1, TRUE, TRUE )  
 machinephase  
 ppm  
 Получено из: MED\_1H\_4-MeOC6H4CSMorph-1.jdf

|                   |                             |
|-------------------|-----------------------------|
| Filename          | = MED_1H_4-MeOC6H4CSMorph-2 |
| Author            | = delta                     |
| Experiment        | = single_pulse.ex2          |
| Sample Id         | = MED_4-MeOC6H4CSMorph      |
| Solvent           | = DMSO-D6                   |
| Actual_Start_Time | = 11-JUL-2023 02:23:47      |
| Revision_Time     | = 11-JUL-2023 13:47:33      |
| Comment           | = single_pulse              |
| Data_Format       | = 1D_COMPLEX                |
| Dim_Size          | = 26214                     |
| X_Domain          | = 1H                        |
| Dim_Title         | = 1H                        |
| Dim_Units         | = [ppm]                     |
| Dimensions        | = X                         |
| Site              | = ECX 400                   |
| Spectrometer      | = JNM-ECX400                |
| Field_Strength    | = 9.389766[T] (400[MHz])    |
| X_Acq_Duration    | = 4.36731904[s]             |
| X_Domain          | = 1H                        |
| X_Freq            | = 399.78219838[MHz]         |
| X_Offset          | = 7[ppm]                    |
| X_Points          | = 32768                     |
| X_Prescans        | = 1                         |
| X_Resolution      | = 0.22897343[Hz]            |
| X_Sweep           | = 7.5030012[kHz]            |
| Irr_Domain        | = 1H                        |
| Irr_Freq          | = 399.78219838[MHz]         |
| Irr_Offset        | = 5[ppm]                    |
| Tri_Domain        | = 1H                        |
| Tri_Freq          | = 399.78219838[MHz]         |
| Tri_Offset        | = 5[ppm]                    |
| Clipped           | = FALSE                     |
| Scans             | = 8                         |
| Total_Scans       | = 8                         |
| Relaxation_Delay  | = 5[s]                      |
| Recvr Gain        | = 24                        |
| Temp_Get          | = 0[dC]                     |
| X_90_Width        | = 5.5[us]                   |
| X_Acq_Time        | = 4.36731904[s]             |
| X_Angle           | = 45[deg]                   |
| X_Atn             | = 3.5[dB]                   |
| X_Pulse           | = 2.75[us]                  |
| Irr_Mode          | = Off                       |
| Tri_Mode          | = Off                       |
| Dante_Presat      | = FALSE                     |

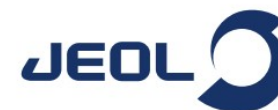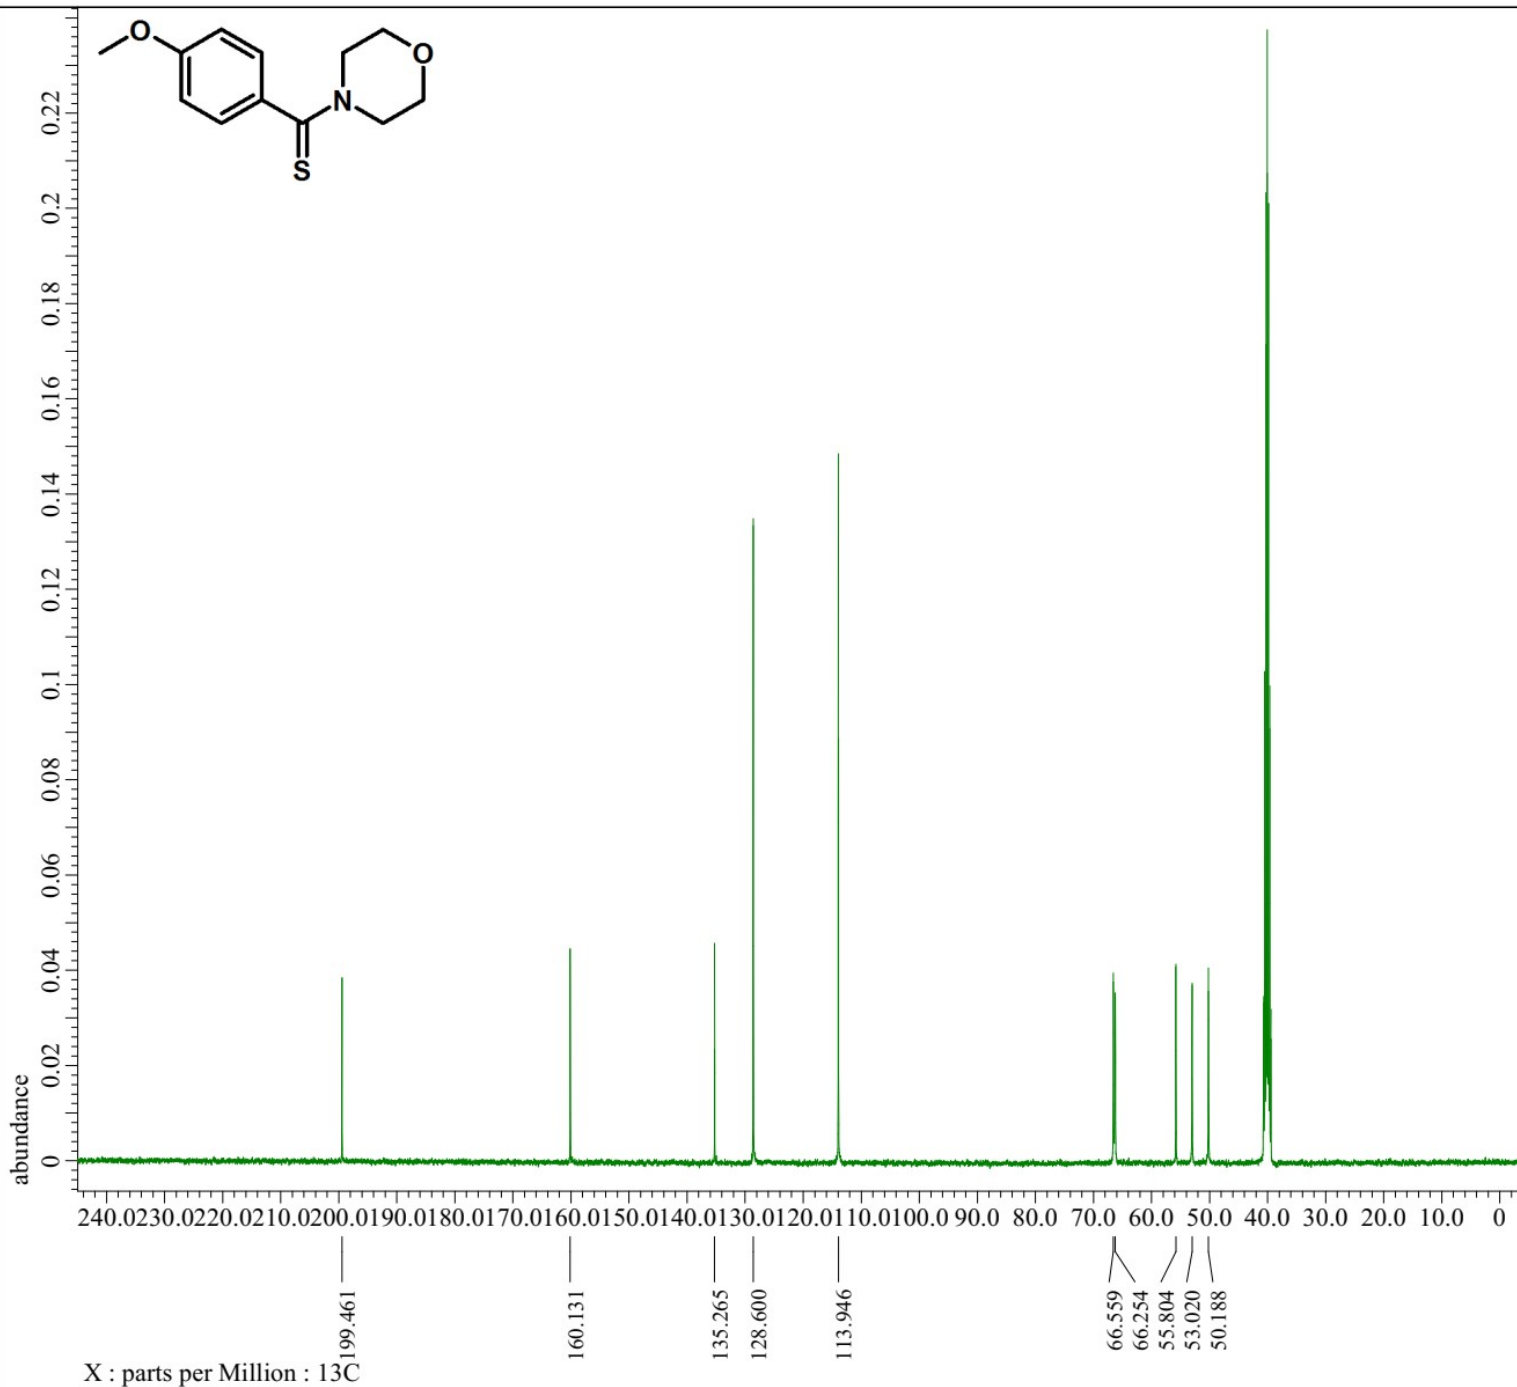

---- PROCESSING PARAMETERS ----  
sexp( 2.0[Hz], 0.0[s] )  
trapezoid( 0[%], 0[%], 80[%], 100[%] )  
zerofill( 1, TRUE )  
fft( 1, TRUE, TRUE )  
machinephase  
ppm

Получено из: MED\_13C\_4-MeOC6H4CSMorph-1.jdf

Filename = MED\_13C\_4-MeOC6H4CSMorph-  
Author = delta  
Experiment = single\_pulse\_dec  
Sample\_Id = MED\_4-MeOC6H4CSMorph  
Solvent = DMSO-D6  
Actual\_Start\_Time = 11-JUL-2023 02:25:53  
Revision\_Time = 11-JUL-2023 13:50:51

Comment = single pulse decoupled ga  
Data\_Format = 1D COMPLEX  
Dim\_Size = 26214  
X\_Domain = 13C  
Dim\_Title = 13C  
Dim\_Units = [ppm]  
Dimensions = X  
Site = ECX 400  
Spectrometer = JNM-ECX400

Field\_Strength = 9.389766[T] (400[MHz])  
X\_Acq\_Duration = 1.04333312[s]  
X\_Domain = 13C  
X\_Freq = 100.52530333[MHz]  
X\_Offset = 120[ppm]  
X\_Points = 32768  
X\_Prescans = 4  
X\_Resolution = 0.95846665[Hz]  
X\_Sweep = 31.40703518[kHz]  
Irr\_Domain = 1H  
Irr\_Freq = 399.78219838[MHz]  
Irr\_Offset = 5[ppm]  
Clipped = FALSE  
Scans = 4000  
Total\_Scans = 4000

Relaxation\_Delay = 2[s]  
Recvr\_Gain = 46  
Temp\_Get = 0[dC]  
X\_90\_Width = 13.87[us]  
X\_Acq\_Time = 1.04333312[s]  
X\_Angle = 30[deg]  
X\_Atn = 5.2[dB]  
X\_Pulse = 4.62333333[us]  
Irr\_Atn\_Dec = 29.907[dB]  
Irr\_Atn\_Noe = 29.907[dB]  
Irr\_Noise = WALTZ  
Decoupling = TRUE  
Initial\_Wait = 1[s]  
Noe = TRUE

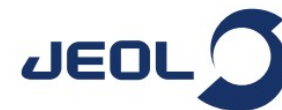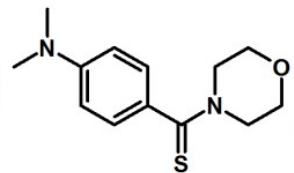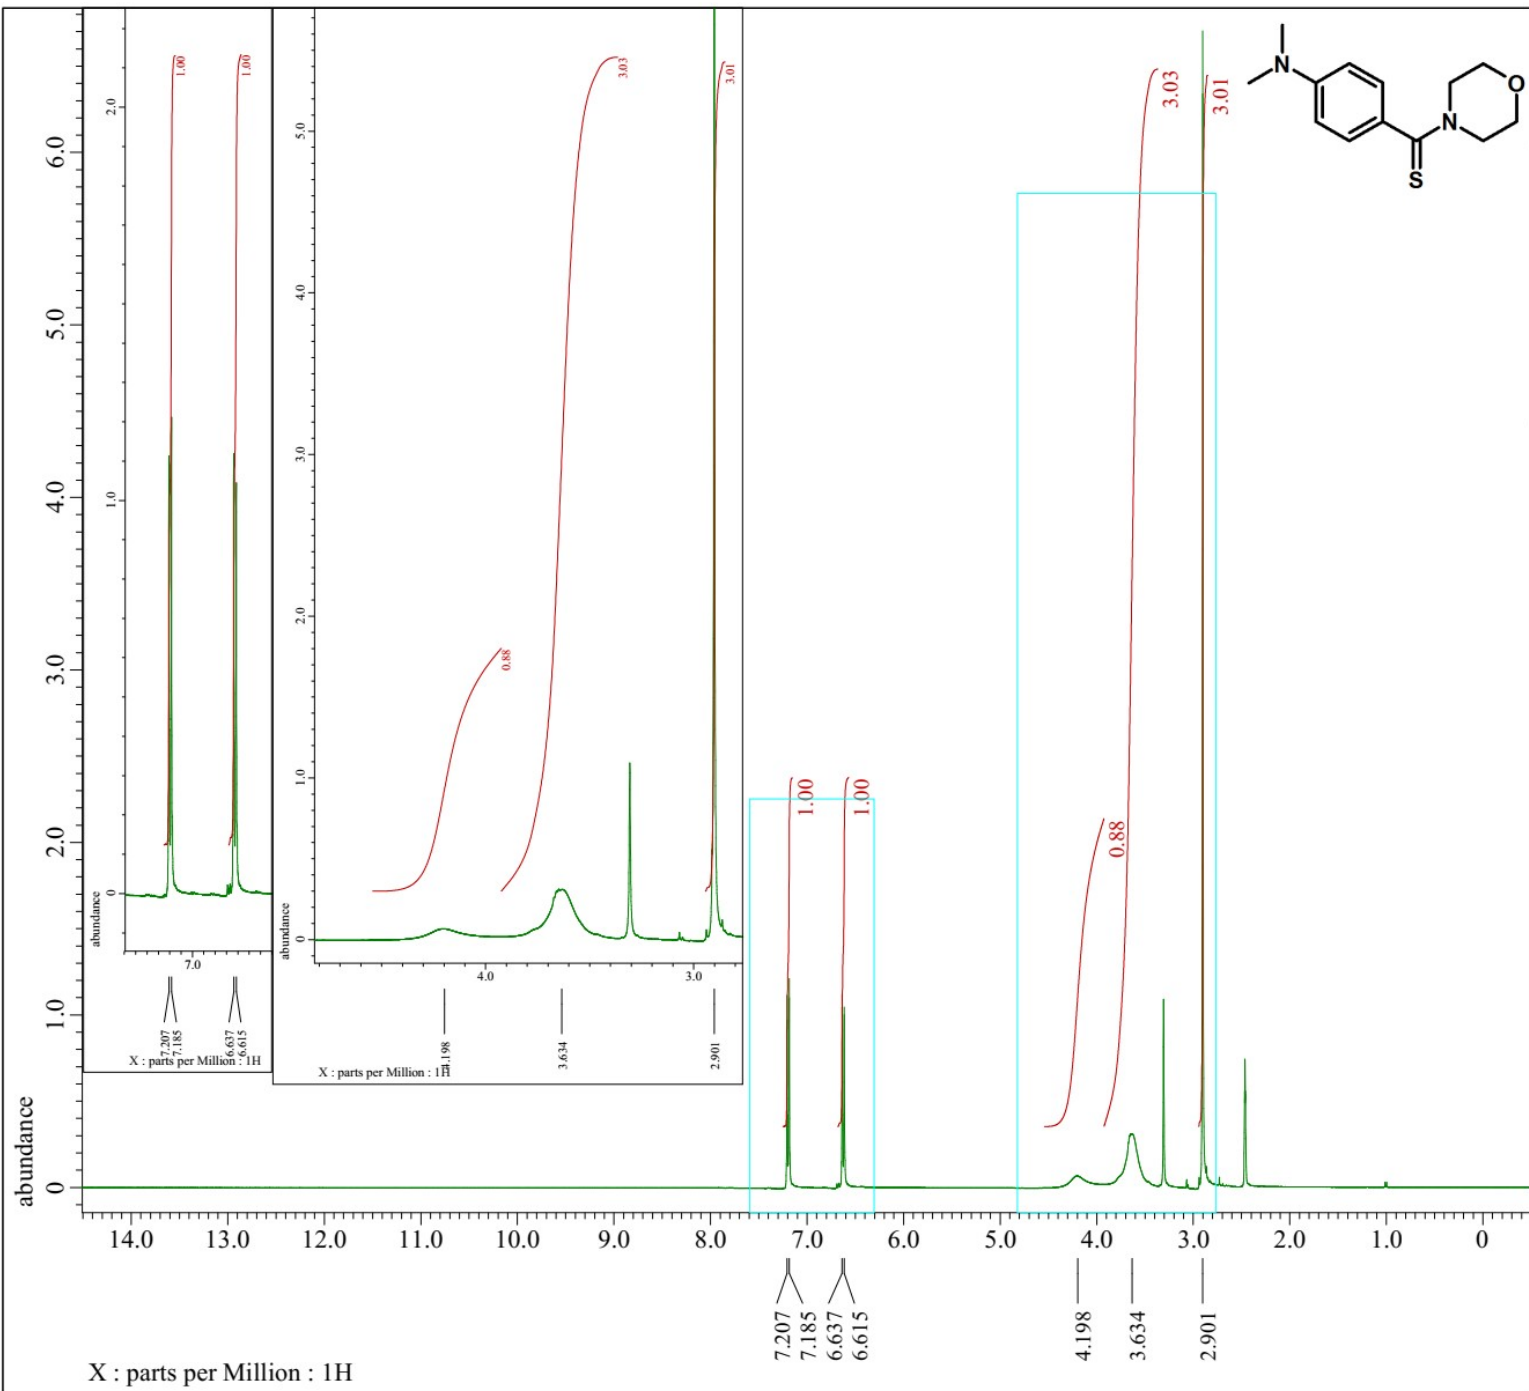

----- PROCESSING PARAMETERS -----  
sexp( 0.2[Hz], 0.0[s] )  
trapezoid( 0[%], 0[%], 80[%], 100[%] )  
zerofill( 1, TRUE )  
fft( 1, TRUE, TRUE )  
machinephase  
ppm  
Получено из: MED\_1H\_4-NMe2C6H4CSMorph-1.jdf

|                   |                             |
|-------------------|-----------------------------|
| Filename          | = MED_1H_4-NMe2C6H4CSMorph- |
| Author            | = delta                     |
| Experiment        | = single_pulse.ex2          |
| Sample Id         | = MED_4-NMe2C6H4CSMorph     |
| Solvent           | = DMSO-D6                   |
| Actual_Start_Time | = 11-JUL-2023 05:53:22      |
| Revision_Time     | = 11-JUL-2023 14:17:56      |
| Comment           | = single_pulse              |
| Data_Format       | = 1D_COMPLEX                |
| Dim_Size          | = 26214                     |
| X_Domain          | = 1H                        |
| Dim_Title         | = 1H                        |
| Dim_Units         | = [ppm]                     |
| Dimensions        | = X                         |
| Site              | = ECX 400                   |
| Spectrometer      | = JNM-ECX400                |
| Field_Strength    | = 9.389766[T] (400[MHz])    |
| X_Acq_Duration    | = 4.36731904[s]             |
| X_Domain          | = 1H                        |
| X_Freq            | = 399.78219838[MHz]         |
| X_Offset          | = 7[ppm]                    |
| X_Points          | = 32768                     |
| X_Prescans        | = 1                         |
| X_Resolution      | = 0.22897343[Hz]            |
| X_Sweep           | = 7.5030012[kHz]            |
| Irr_Domain        | = 1H                        |
| Irr_Freq          | = 399.78219838[MHz]         |
| Irr_Offset        | = 5[ppm]                    |
| Tri_Domain        | = 1H                        |
| Tri_Freq          | = 399.78219838[MHz]         |
| Tri_Offset        | = 5[ppm]                    |
| Clipped           | = FALSE                     |
| Scans             | = 8                         |
| Total_Scans       | = 8                         |
| Relaxation_Delay  | = 5[s]                      |
| Recvr_Gain        | = 26                        |
| Temp_Get          | = 0[dC]                     |
| X_90_Width        | = 5.5[us]                   |
| X_Acq_Time        | = 4.36731904[s]             |
| X_Angle           | = 45[deg]                   |
| X_Atn             | = 3.5[dB]                   |
| X_Pulse           | = 2.75[us]                  |
| Irr_Mode          | = Off                       |
| Tri_Mode          | = Off                       |
| Dante_Presat      | = FALSE                     |

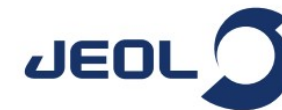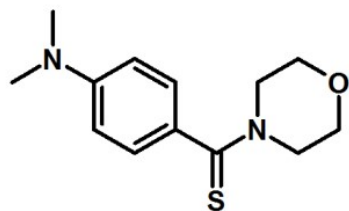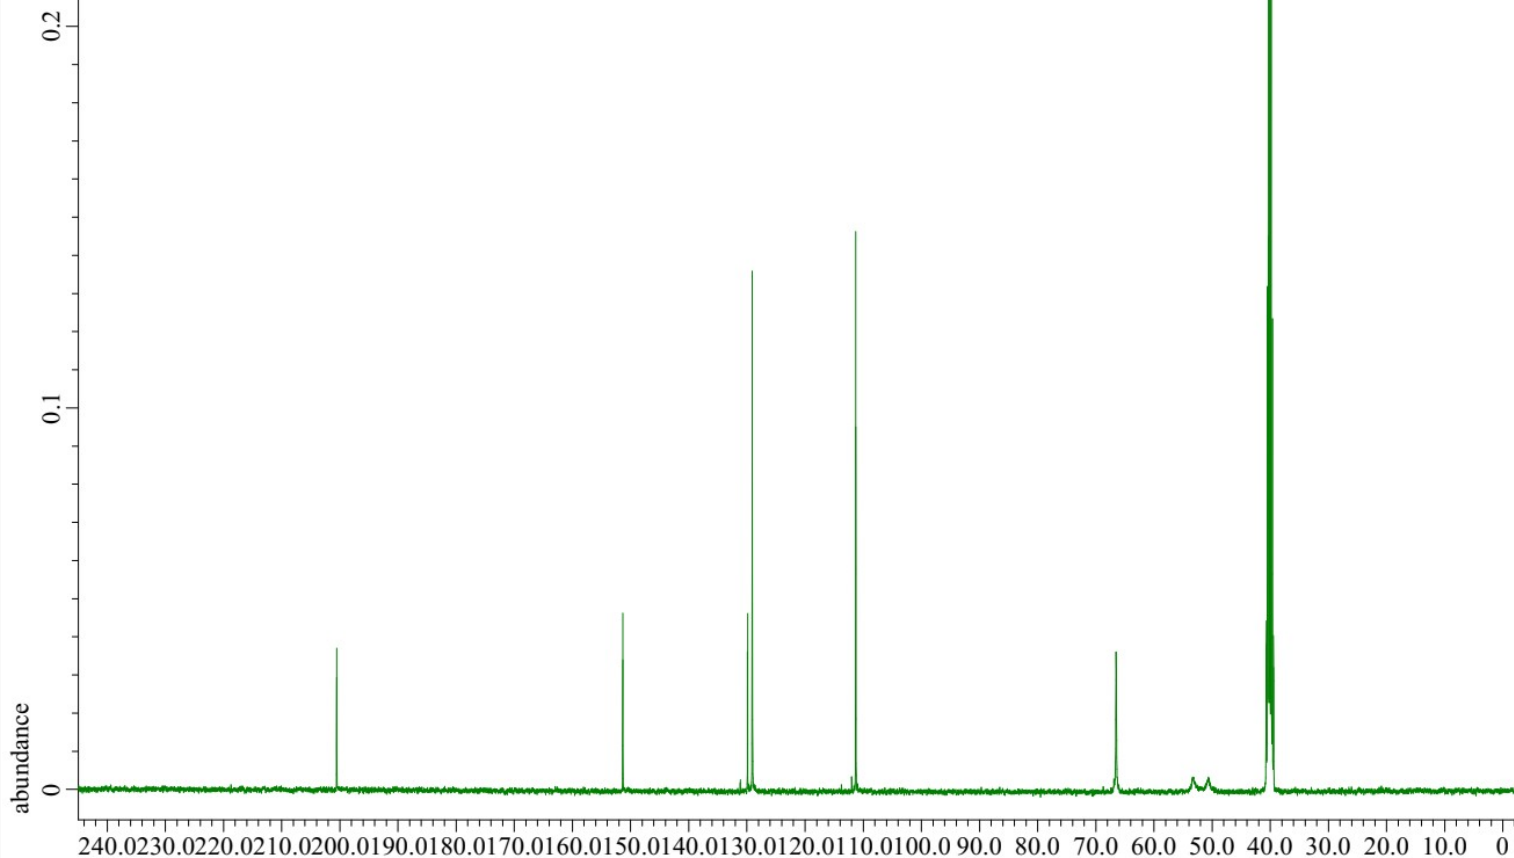

---- PROCESSING PARAMETERS ----  
sexp( 2.0[Hz], 0.0[s] )  
trapezoid( 0[%], 0[%], 80[%], 100[%] )  
zerofill( 1, TRUE )  
fft( 1, TRUE, TRUE )  
machinephase  
ppm

Получено из: MED\_13C\_4-NMe2C6H4CSMorph-1.jdf

Filename = MED\_13C\_4-NMe2C6H4CSMorph  
Author = delta  
Experiment = single\_pulse\_dec  
Sample Id = MED\_4-NMe2C6H4CSMorph  
Solvent = DMSO-D6  
Actual\_Start\_Time = 11-JUL-2023 05:55:30  
Revision\_Time = 11-JUL-2023 14:22:16

Comment = single pulse decoupled ga  
Data\_Format = 1D COMPLEX  
Dim\_Size = 26214  
X\_Domain = 13C  
Dim\_Title = 13C  
Dim\_Units = [ppm]  
Dimensions = X  
Site = ECX 400  
Spectrometer = JNM-ECX400

Field\_Strength = 9.389766[T] (400[MHz])  
X\_Acq\_Duration = 1.04333312[s]  
X\_Domain = 13C  
X\_Freq = 100.52530333[MHz]  
X\_Offset = 120[ppm]  
X\_Points = 32768  
X\_Prescans = 4  
X\_Resolution = 0.95846665[Hz]  
X\_Sweep = 31.40703518[kHz]  
Irr\_Domain = 1H  
Irr\_Freq = 399.78219838[MHz]  
Irr\_Offset = 5[ppm]  
Clipped = FALSE  
Scans = 4000  
Total\_Scans = 4000

Relaxation\_Delay = 2[s]  
Recvr\_Gain = 48  
Temp\_Get = 0[dC]  
X\_90\_Width = 13.87[us]  
X\_Acq\_Time = 1.04333312[s]  
X\_Angle = 30[deg]  
X\_Atn = 5.2[dB]  
X\_Pulse = 4.62333333[us]  
Irr\_Atn\_Dec = 29.907[dB]  
Irr\_Atn\_Noise = 29.907[dB]  
Irr\_Noise = WALTZ  
Decoupling = TRUE  
Initial\_Wait = 1[s]  
Noe = TRUE

X : parts per Million : 13C



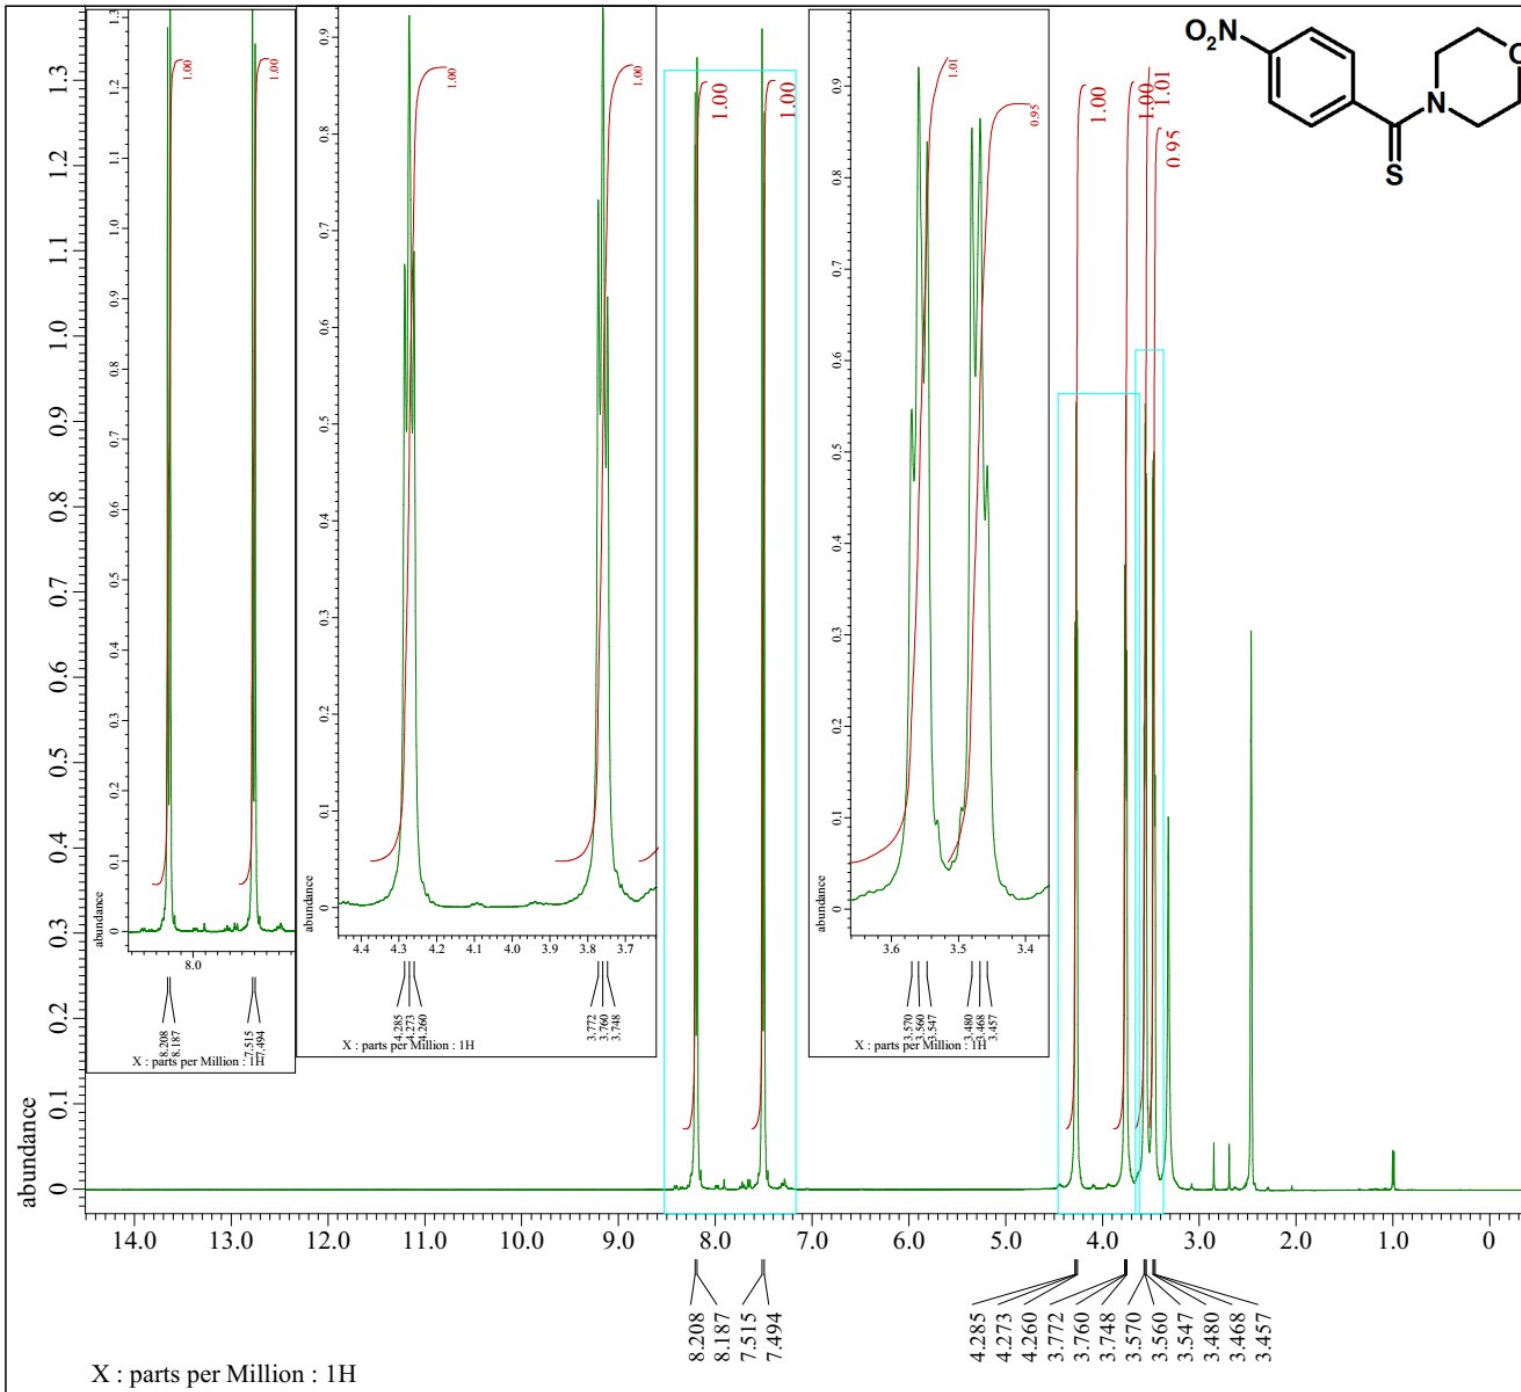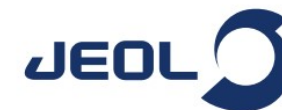

```

---- PROCESSING PARAMETERS ----
sexp( 0.2[Hz], 0.0[s] )
trapezoid( 0[%], 0[%], 80[%], 100[%] )
zerofill( 1, TRUE )
fft( 1, TRUE, TRUE )
machinephase
ppm
  
```

Получено из: MED\_1H\_4-NO2C6H4CSMorph-1.jdf

```

Filename      = MED_1H_4-NO2C6H4CSMorph-2
Author       = delta
Experiment   = single_pulse.ex2
Sample Id    = MED_4-NO2C6H4CSMorph
Solvent      = DMSO-D6
Actual_Start Time = 11-JUL-2023 09:22:55
Revision_Time  = 11-JUL-2023 14:33:43
  
```

```

Comment      = single_pulse
Data_Format  = 1D COMPLEX
Dim_Size     = 26214
X_Domain     = 1H
Dim_Title    = 1H
Dim_Units    = [ppm]
Dimensions   = X
Site         = ECX 400
Spectrometer = JNM-ECX400
  
```

```

Field_Strength = 9.389766[T] (400[MHz])
X_Acq_Duration = 4.36731904[s]
X_Domain       = 1H
X_Freq         = 399.78219838 [MHz]
X_Offset       = 7 [ppm]
X_Points       = 32768
X_Prescans     = 1
X_Resolution   = 0.22897343 [Hz]
X_Sweep        = 7.5030012 [kHz]
Irr_Domain     = 1H
Irr_Freq       = 399.78219838 [MHz]
Irr_Offset     = 5 [ppm]
Tri_Domain     = 1H
Tri_Freq       = 399.78219838 [MHz]
Tri_Offset     = 5 [ppm]
Clipped        = FALSE
Scans          = 8
Total_Scans    = 8
  
```

```

Relaxation_Delay = 5 [s]
Recvr_Gain       = 26
Temp_Get         = 0 [dC]
X_90_Width      = 5.5 [us]
X_Acq_Time       = 4.36731904 [s]
X_Angle         = 45 [deg]
X_Atn           = 3.5 [dB]
X_Pulse         = 2.75 [us]
Irr_Mode        = Off
Tri_Mode        = Off
Dante_Presat    = FALSE
  
```



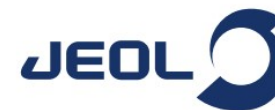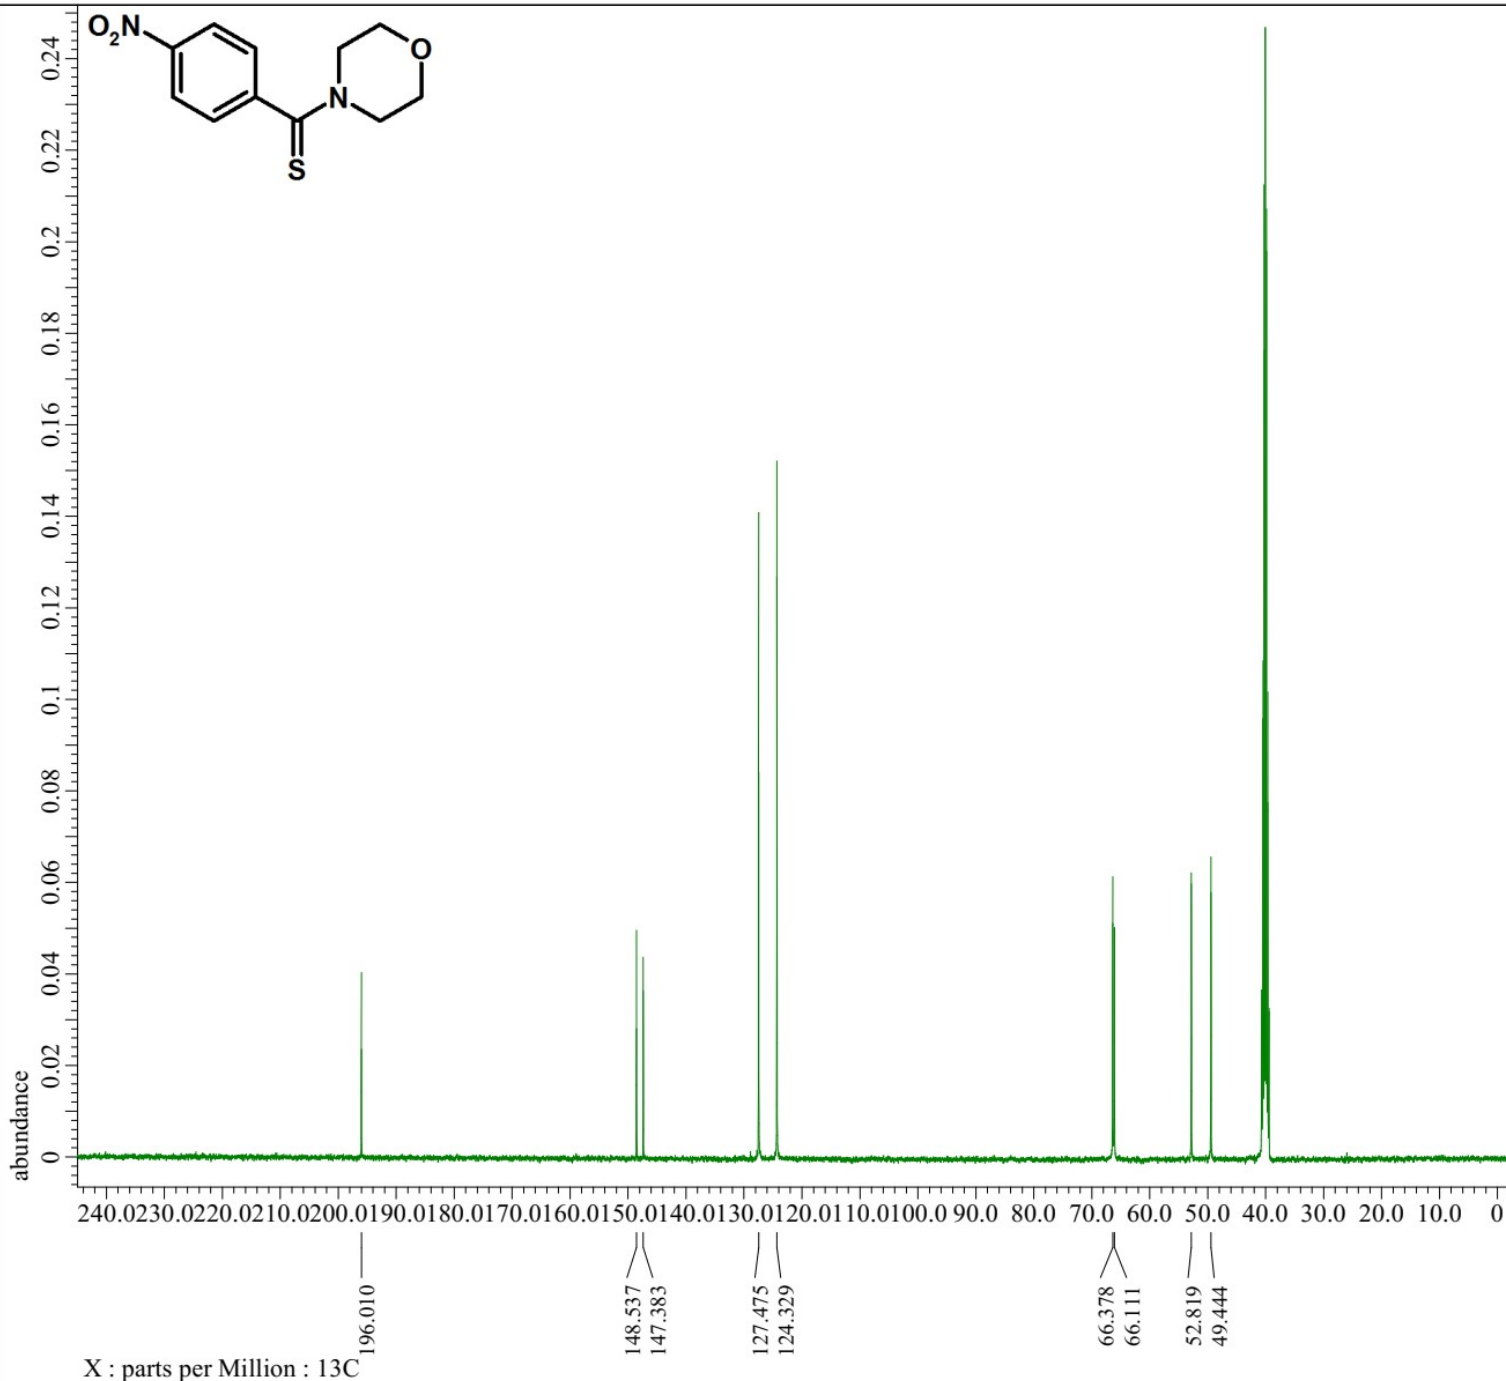

```
----- PROCESSING PARAMETERS -----  
sexp( 2.0[Hz], 0.0[s] )  
trapezoid( 0[%], 0[%], 80[%], 100[%] )  
zerofill( 1, TRUE )  
fft( 1, TRUE, TRUE )  
machinephase  
ppm
```

Получено из: MED\_13C\_4-NO2C6H4CSMorph-1.jdf

```
Filename      = MED_13C_4-NO2C6H4CSMorph-  
Author        = delta  
Experiment    = single_pulse_dec  
Sample_Id     = MED_4-NO2C6H4CSMorph  
Solvent       = DMSO-D6  
Actual_Start_Time = 11-JUL-2023 09:24:57  
Revision_Time  = 11-JUL-2023 14:55:07
```

```
Comment       = single pulse decoupled ga  
Data_Format   = 1D COMPLEX  
Dim_Size      = 26214  
X_Domain      = 13C  
Dim_Title     = 13C  
Dim_Units     = [ppm]  
Dimensions    = X  
Site          = ECX 400  
Spectrometer  = JNM-ECX400
```

```
Field_Strength = 9.389766[T] (400[MHz])  
X_Acq_Duration = 1.04333312[s]  
X_Domain       = 13C  
X_Freq         = 100.52530333[MHz]  
X_Offset       = 120[ppm]  
X_Points       = 32768  
X_Prescans     = 4  
X_Resolution   = 0.95846665[Hz]  
X_Sweep        = 31.40703518[kHz]  
Irr_Domain     = 1H  
Irr_Freq       = 399.78219838[MHz]  
Irr_Offset     = 5[ppm]  
Clipped        = FALSE  
Scans          = 4000  
Total_Scans    = 4000
```

```
Relaxation_Delay = 2[s]  
Recvr_Gain       = 46  
Temp_Get         = 0[dC]  
X_90_Width      = 13.87[us]  
X_Acq_Time      = 1.04333312[s]  
X_Angle         = 30[deg]  
X_Atn           = 5.2[dB]  
X_Pulse         = 4.62333333[us]  
Irr_Atn_Dec     = 29.907[dB]  
Irr_Atn_No     = 29.907[dB]  
Irr_Noise       = WALTZ  
Decoupling      = TRUE  
Initial_Wait    = 1[s]  
Noe             = TRUE
```

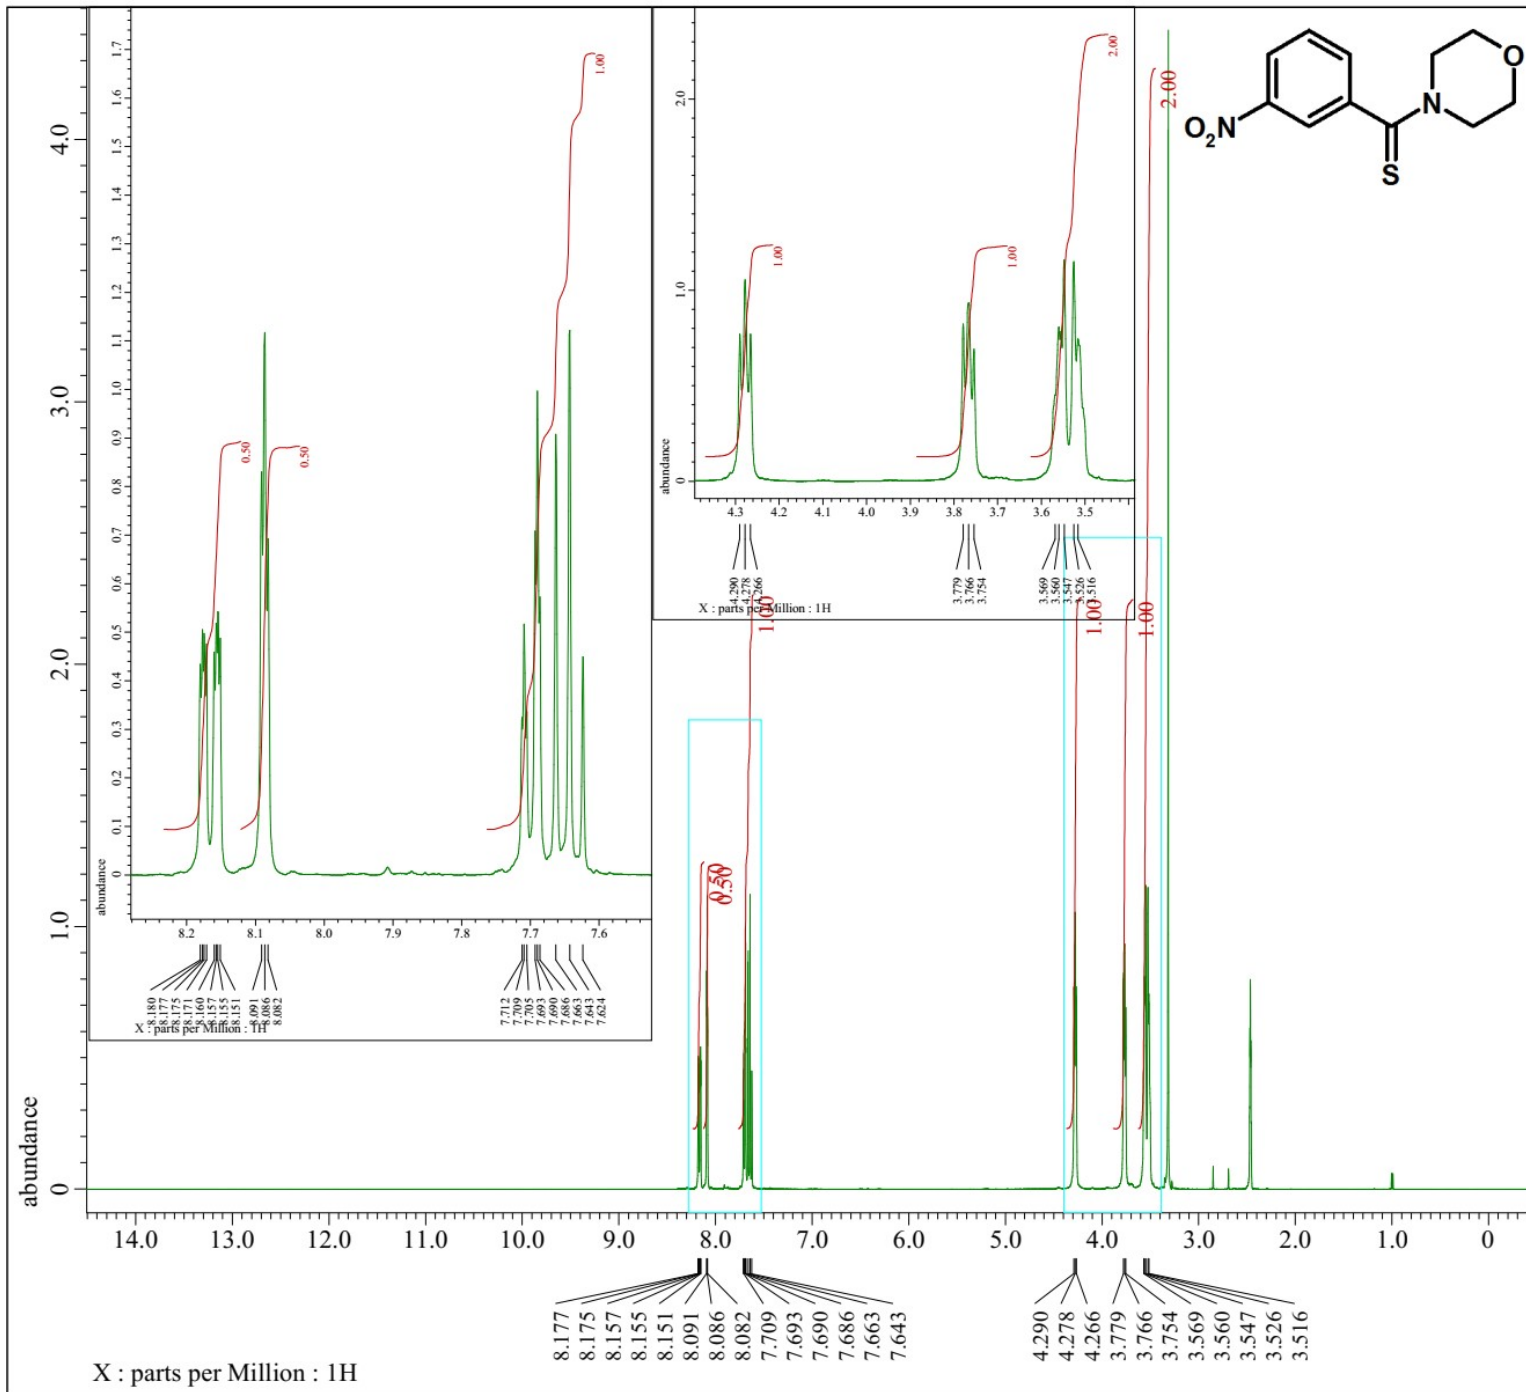

---- PROCESSING PARAMETERS ----  
sexp( 0.2[Hz], 0.0[s] )  
trapezoid( 0[%], 0[%], 80[%], 100[%] )  
zerofill( 1, TRUE )  
fft( 1, TRUE, TRUE )  
machinephase  
ppm  
Получено из: MED\_1H\_3-NO2C6H4CSMorph-1.jdf

Filename = MED\_1H\_3-NO2C6H4CSMorph-2  
Author = delta  
Experiment = single\_pulse.ex2  
Sample\_Id = MED\_3-NO2C6H4CSMorph  
Solvent = DMSO-D6  
Actual\_Start\_Time = 11-JUL-2023 12:52:23  
Revision\_Time = 11-JUL-2023 15:00:47

Comment = single\_pulse  
Data\_Format = 1D\_COMPLEX  
Dim\_Size = 26214  
X\_Domain = 1H  
Dim\_Title = 1H  
Dim\_Units = [ppm]  
Dimensions = X  
Site = ECX 400  
Spectrometer = JNM-ECX400

Field\_Strength = 9.389766[T] (400[MHz])  
X\_Acq\_Duration = 4.36731904[s]  
X\_Domain = 1H  
X\_Freq = 399.78219838[MHz]  
X\_Offset = 7[ppm]  
X\_Points = 32768  
X\_Prescans = 1  
X\_Resolution = 0.22897343[Hz]  
X\_Sweep = 7.5030012[kHz]  
Irr\_Domain = 1H  
Irr\_Freq = 399.78219838[MHz]  
Irr\_Offset = 5[ppm]  
Tri\_Domain = 1H  
Tri\_Freq = 399.78219838[MHz]  
Tri\_Offset = 5[ppm]  
Clipped = FALSE  
Scans = 8  
Total\_Scans = 8

Relaxation\_Delay = 5[s]  
Recvr\_Gain = 26  
Temp\_Get = 0[dC]  
X\_90\_Width = 5.5[us]  
X\_Acq\_Time = 4.36731904[s]  
X\_Angle = 45[deg]  
X\_Atn = 3.5[dB]  
X\_Pulse = 2.75[us]  
Irr\_Mode = Off  
Tri\_Mode = Off  
Dante\_Presat = FALSE

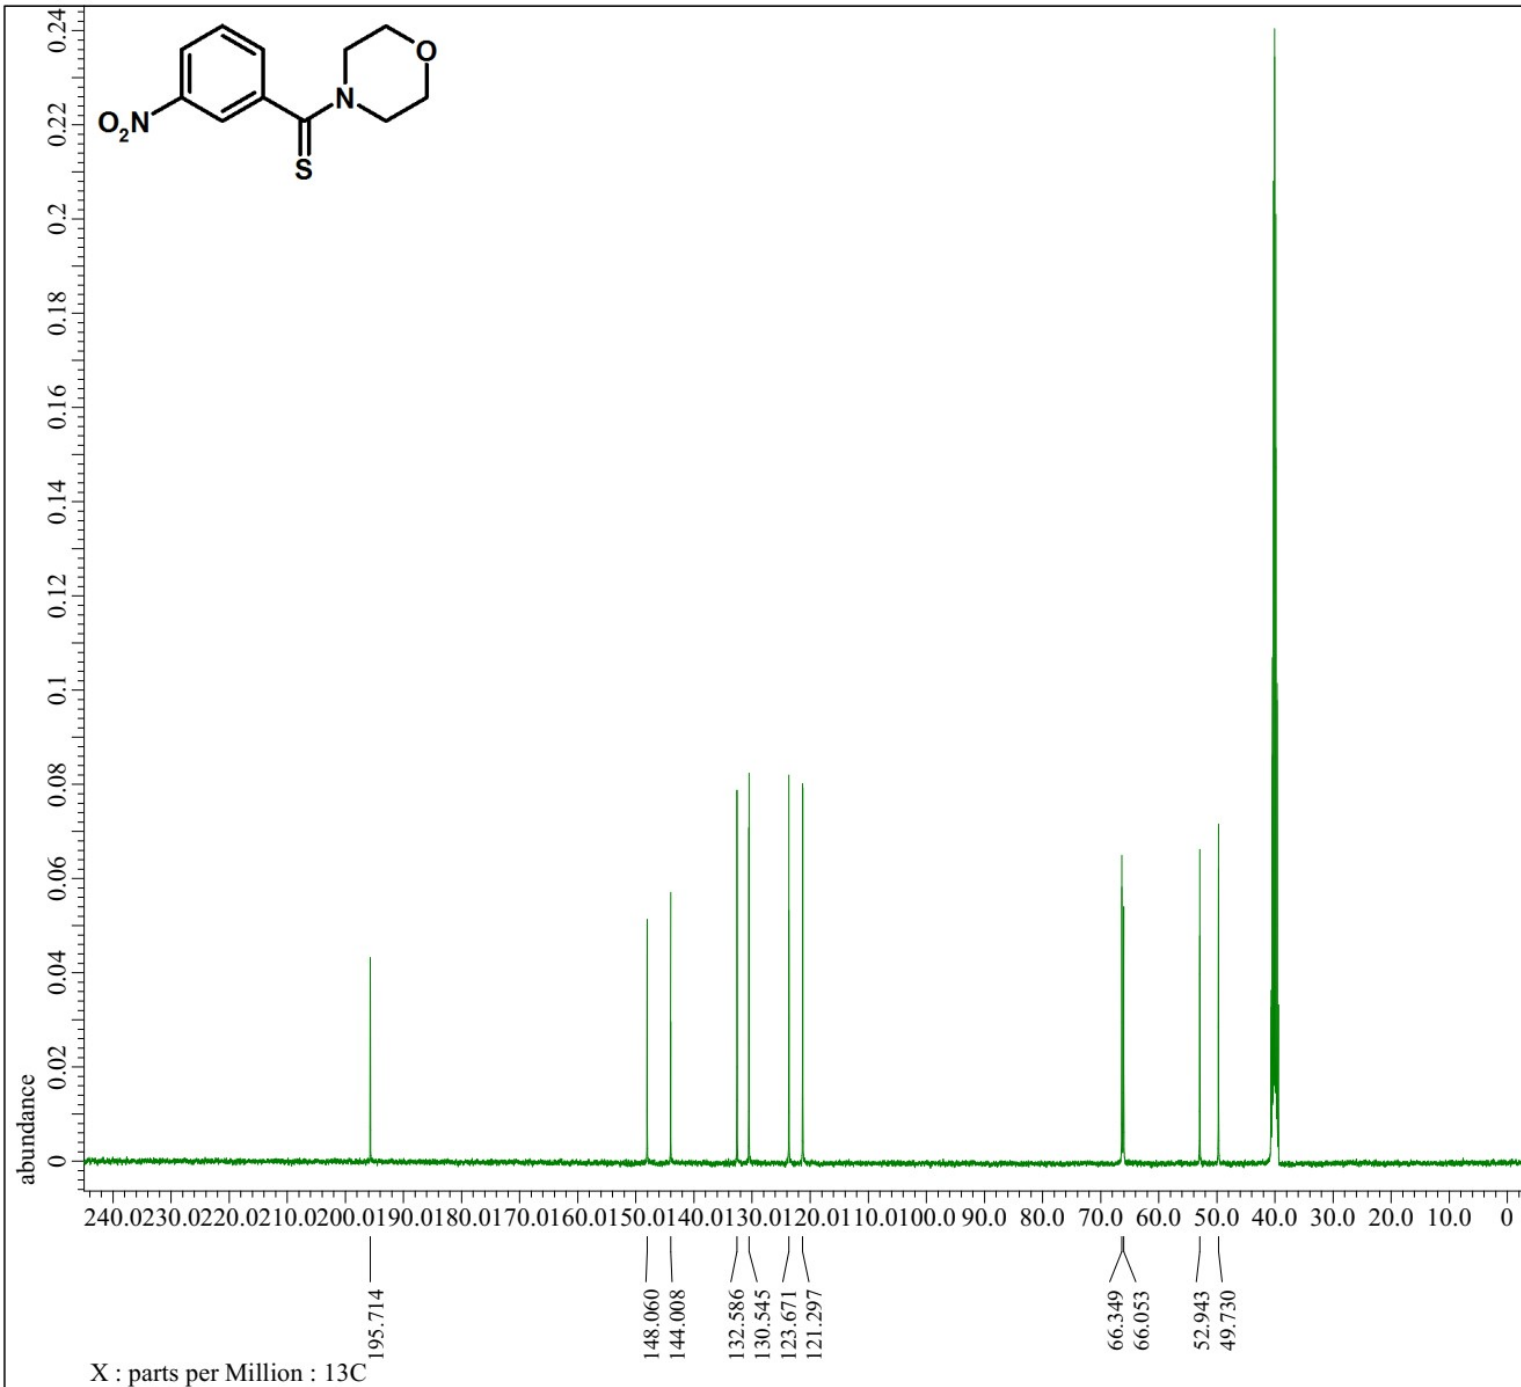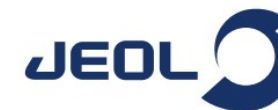

```

---- PROCESSING PARAMETERS ----
sexp( 2.0[Hz], 0.0[s] )
trapezoid( 0[%], 0[%], 80[%], 100[%] )
zerofill( 1, TRUE )
fft( 1, TRUE, TRUE )
machinephase
ppm

```

Получено из: MED\_13C\_3-NO2C6H4CSMorph-1.jdf

```

Filename      = MED_13C_3-NO2C6H4CSMorph-
Author       = delta
Experiment    = single_pulse_dec
Sample Id     = MED_3-NO2C6H4CSMorph
Solvent      = DMSO-D6
Actual_Start_Time = 11-JUL-2023 12:54:26
Revision_Time  = 11-JUL-2023 15:26:04

```

```

Comment      = single pulse decoupled ga
Data Format   = 1D COMPLEX
Dim Size     = 26214
X_Domain    = 13C
Dim Title    = 13C
Dim Units    = [ppm]
Dimensions   = X
Site         = ECX 400
Spectrometer = JNM-ECX400

```

```

Field Strength = 9.389766[T] (400[MHz])
X_Acq_Duration = 1.04333312[s]
X_Domain      = 13C
X_Freq       = 100.52530333[MHz]
X_Offset     = 120[ppm]
X_Points     = 32768
X_Prescans   = 4
X_Resolution = 0.95846665[Hz]
X_Sweep      = 31.40703518[kHz]
Irr_Domain   = 1H
Irr_Freq     = 399.78219838[MHz]
Irr_Offset   = 5[ppm]
Clipped      = FALSE
Scans        = 4000
Total_Scans  = 4000

```

```

Relaxation_Delay = 2[s]
Recvr Gain       = 46
Temp_Get         = 0[dC]
X_90_Width      = 13.87[us]
X_Acq_Time      = 1.04333312[s]
X_Angle         = 30[deg]
X_Atn           = 5.2[dB]
X_Pulse         = 4.62333333[us]
Irr_Atn_Dec     = 29.907[dB]
Irr_Atn_Noise  = 29.907[dB]
Irr_Noise       = WALTZ
Decoupling      = TRUE
Initial_Wait    = 1[s]
Noe             = TRUE

```

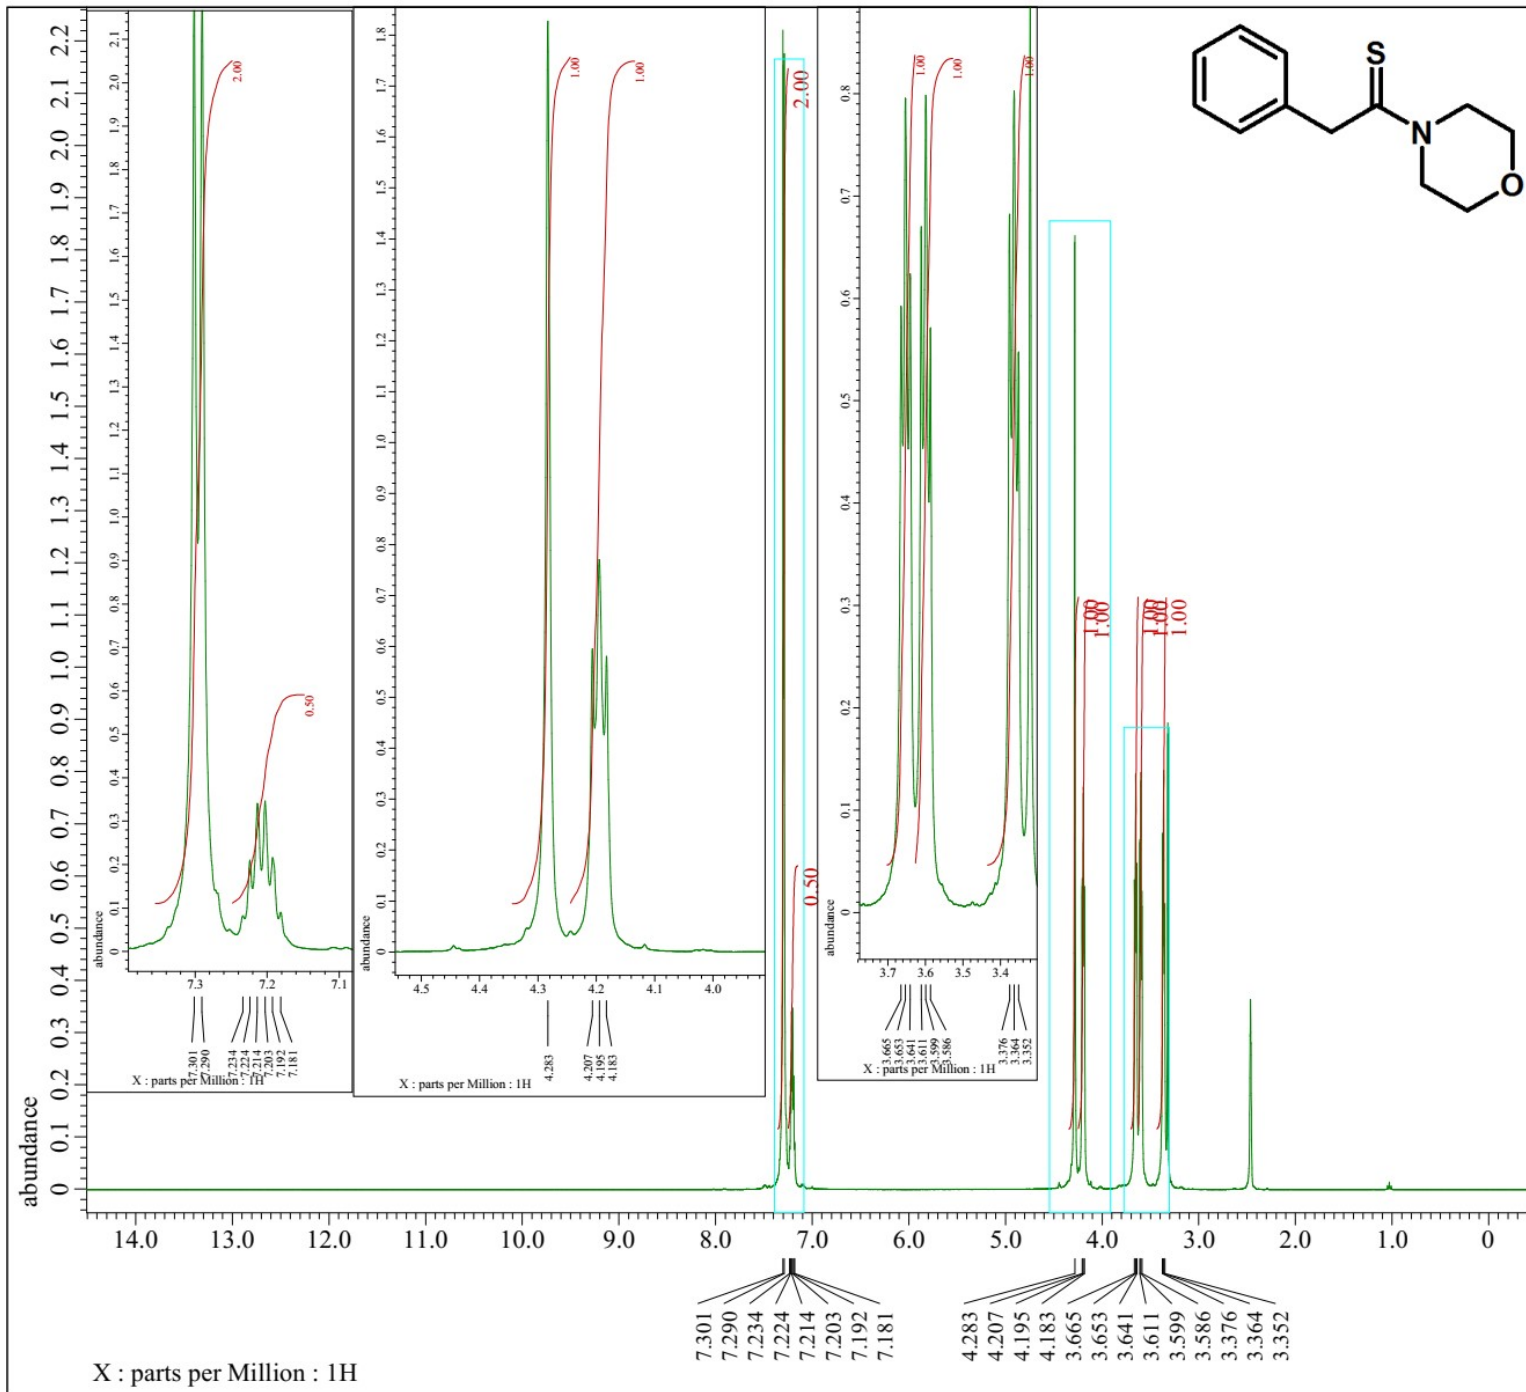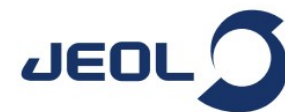

```

---- PROCESSING PARAMETERS ----
sexp( 0.2[Hz], 0.0[s] )
trapezoid( 0[%], 0[%], 80[%], 100[%] )
zerofill( 1, TRUE )
fft( 1, TRUE, TRUE )
machinephase
ppm
  
```

Получено из: MED\_1H\_C6H5CH2CSMorph-1.jdf

```

Filename      = MED_1H_C6H5CH2CSMorph-2.j
Author        = delta
Experiment    = single_pulse.ex2
Sample_Id     = MED_C6H5CH2CSMorph
Solvent       = DMSO-D6
Actual_Start_Time = 12-JUL-2023 13:27:50
Revision_Time  = 13-JUL-2023 13:30:13
  
```

```

Comment       = single_pulse
Data_Format   = 1D COMPLEX
Dim_Size      = 26214
X_Domain      = 1H
Dim_Title     = 1H
Dim_Units     = [ppm]
Dimensions    = X
Site          = ECX 400
Spectrometer  = JNM-ECX400
  
```

```

Field_Strength = 9.389766[T] (400[MHz])
X_Acq_Duration = 4.36731904[s]
X_Domain       = 1H
X_Freq         = 399.78219838[MHz]
X_Offset       = 7[ppm]
X_Points       = 32768
X_Prescans     = 1
X_Resolution   = 0.22897343[Hz]
X_Sweep        = 7.5030012[kHz]
Irr_Domain     = 1H
Irr_Freq       = 399.78219838[MHz]
Irr_Offset     = 5[ppm]
Tri_Domain     = 1H
Tri_Freq       = 399.78219838[MHz]
Tri_Offset     = 5[ppm]
Clipped        = FALSE
Scans          = 8
Total_Scans    = 8
  
```

```

Relaxation_Delay = 5[s]
Recvr_Gain       = 22
Temp_Get         = 0[dC]
X_90_Width      = 5.5[us]
X_Acq_Time       = 4.36731904[s]
X_Angle         = 45[deg]
X_Atn           = 3.5[dB]
X_Pulse         = 2.75[us]
Irr_Mode        = Off
Tri_Mode        = Off
Dante_Presat    = FALSE
  
```



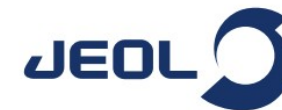

----- PROCESSING PARAMETERS -----  
sexp( 2.0[Hz], 0.0[s] )  
trapezoid( 0[%], 0[%], 80[%], 100[%] )  
zerofill( 1, TRUE )  
fft( 1, TRUE, TRUE )  
machinephase  
ppm

Получено из: MED\_13C\_C6H5CH2CSMorph-1.jdf

Filename = MED\_13C\_C6H5CH2CSMorph-2.  
Author = delta  
Experiment = single\_pulse\_dec  
Sample Id = MED\_C6H5CH2CSMorph  
Solvent = DMSO-D6  
Actual\_Start Time = 12-JUL-2023 13:29:52  
Revision\_Time = 13-JUL-2023 13:39:26

Comment = single pulse decoupled ga  
Data\_Format = 1D COMPLEX  
Dim\_Size = 26214  
X\_Domain = 13C  
Dim\_Title = 13C  
Dim\_Units = [ppm]  
Dimensions = X  
Site = ECX 400  
Spectrometer = JNM-ECX400

Field Strength = 9.389766[T] (400[MHz])  
X\_Acq\_Duration = 1.0433312[s]  
X\_Domain = 13C  
X\_Freq = 100.52530333[MHz]  
X\_Offset = 120[ppm]  
X\_Points = 32768  
X\_Prescans = 4  
X\_Resolution = 0.95846665[Hz]  
X\_Sweep = 31.40703518[kHz]  
Irr\_Domain = 1H  
Irr\_Freq = 399.78219838[MHz]  
Irr\_Offset = 5[ppm]  
Clipped = FALSE  
Scans = 4000  
Total\_Scans = 4000

Relaxation\_Delay = 2[s]  
Recvr\_Gain = 46  
Temp\_Get = 0[dC]  
X\_90\_Width = 13.87[us]  
X\_Acq\_Time = 1.0433312[s]  
X\_Angle = 30[deg]  
X\_Atn = 5.2[dB]  
X\_Pulse = 4.62333333[us]  
Irr\_Atn\_Dec = 29.907[dB]  
Irr\_Atn\_Noie = 29.907[dB]  
Irr\_Noise = WALTZ  
Decoupling = TRUE  
Initial\_Wait = 1[s]  
Noe = TRUE

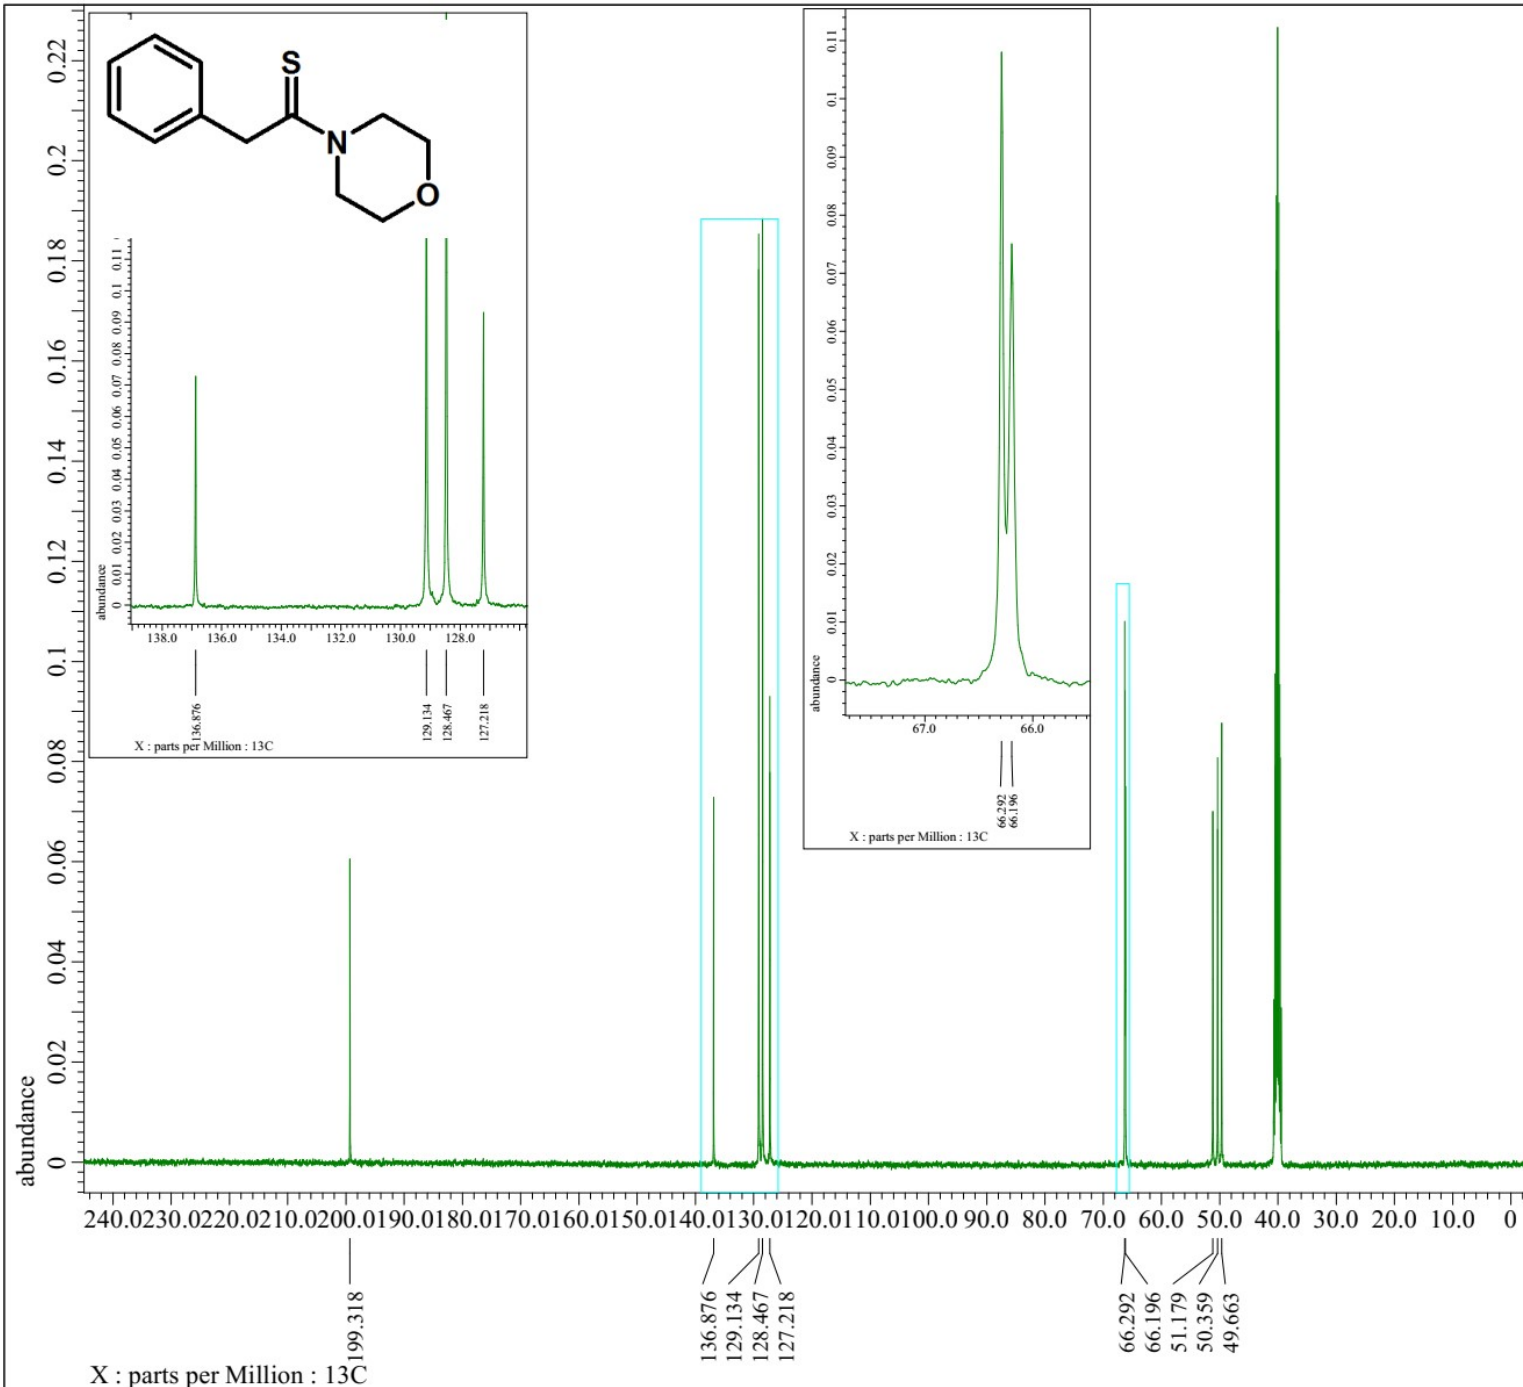



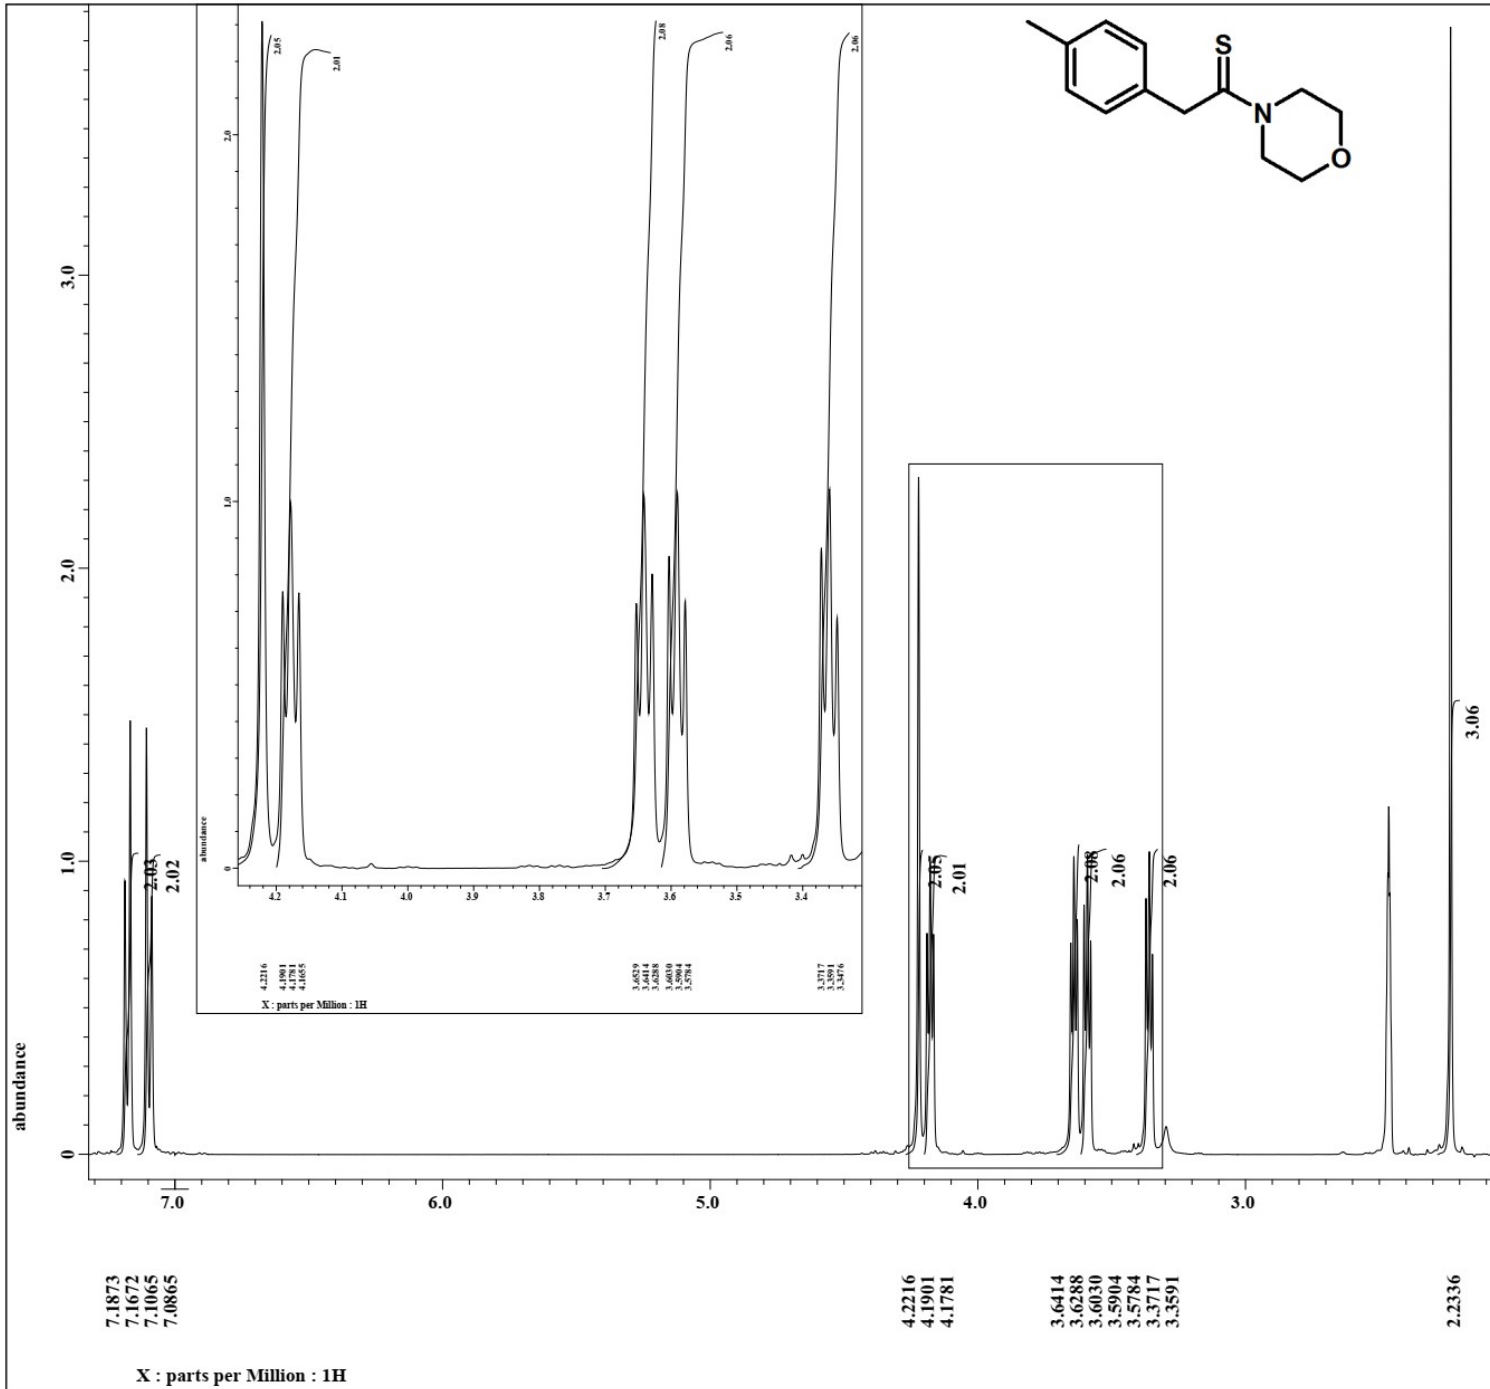

```

----- PROCESSING PARAMETERS -----
dc balance : 0 : FALSE
seXp : 0.2[Hz] : 0.0[s]
trapezoid3 : 0[%] : 80[%] : 100[%]
zerofill : 1
fft : 1 : TRUE : TRUE
machinephase
ppm
Derived from: MED_1H_4-MePhCH2CSMorph-1.

Filename      = MED_1H_4-MePhCH2CSMorph
Author       = delta
Experiment   = single_pulse.ex2
Sample_id    = MED_4-MePhCH2CSMorph
Solvent      = DMSO-D6
Creation time = 21-AUG-2023 01:27:03
Revision time = 21-AUG-2023 11:00:17
Current_time = 21-AUG-2023 11:01:40

Comment       = single_pulse
Data format   = 1D_COMPLEX
Dim_size      = 26214
Dim_title     = 1H
Dim_units     = [ppm]
Dimensions    = X
Site          = ECX 400
Spectrometer  = JNM-ECX400

Field strength = 9.389766[T] (400[MHz])
X_acq_duration = 4.36731904[s]
X_domain       = 1H
X_freq         = 399.78219838[MHz]
X_offset       = 7[ppm]
X_points       = 32768
X_prescans     = 1
X_resolution   = 0.22897343[Hz]
X_sweep        = 7.5030012[kHz]
Irr_domain     = 1H
Irr_freq       = 399.78219838[MHz]
Irr_offset     = 5[ppm]
Tri_domain     = 1H
Tri_freq       = 399.78219838[MHz]
Tri_offset     = 5[ppm]
Clipped        = FALSE
Mod_return     = 1
Scans          = 8
Total_scans    = 8

X_90_width    = 5.5[us]
X_acq_time     = 4.36731904[s]
X_angle        = 45[deg]
X_atn          = 3.5[dB]
X_pulse        = 2.75[us]
Irr_mode       = Off
Tri_mode       = Off
Dante_presat   = FALSE
Initial_wait   = 1[s]
Recvr_gain     = 32
Relaxation_delay = 5[s]
Repetition_time = 9.36731904[s]
Temp_get       = 0[dc]

```

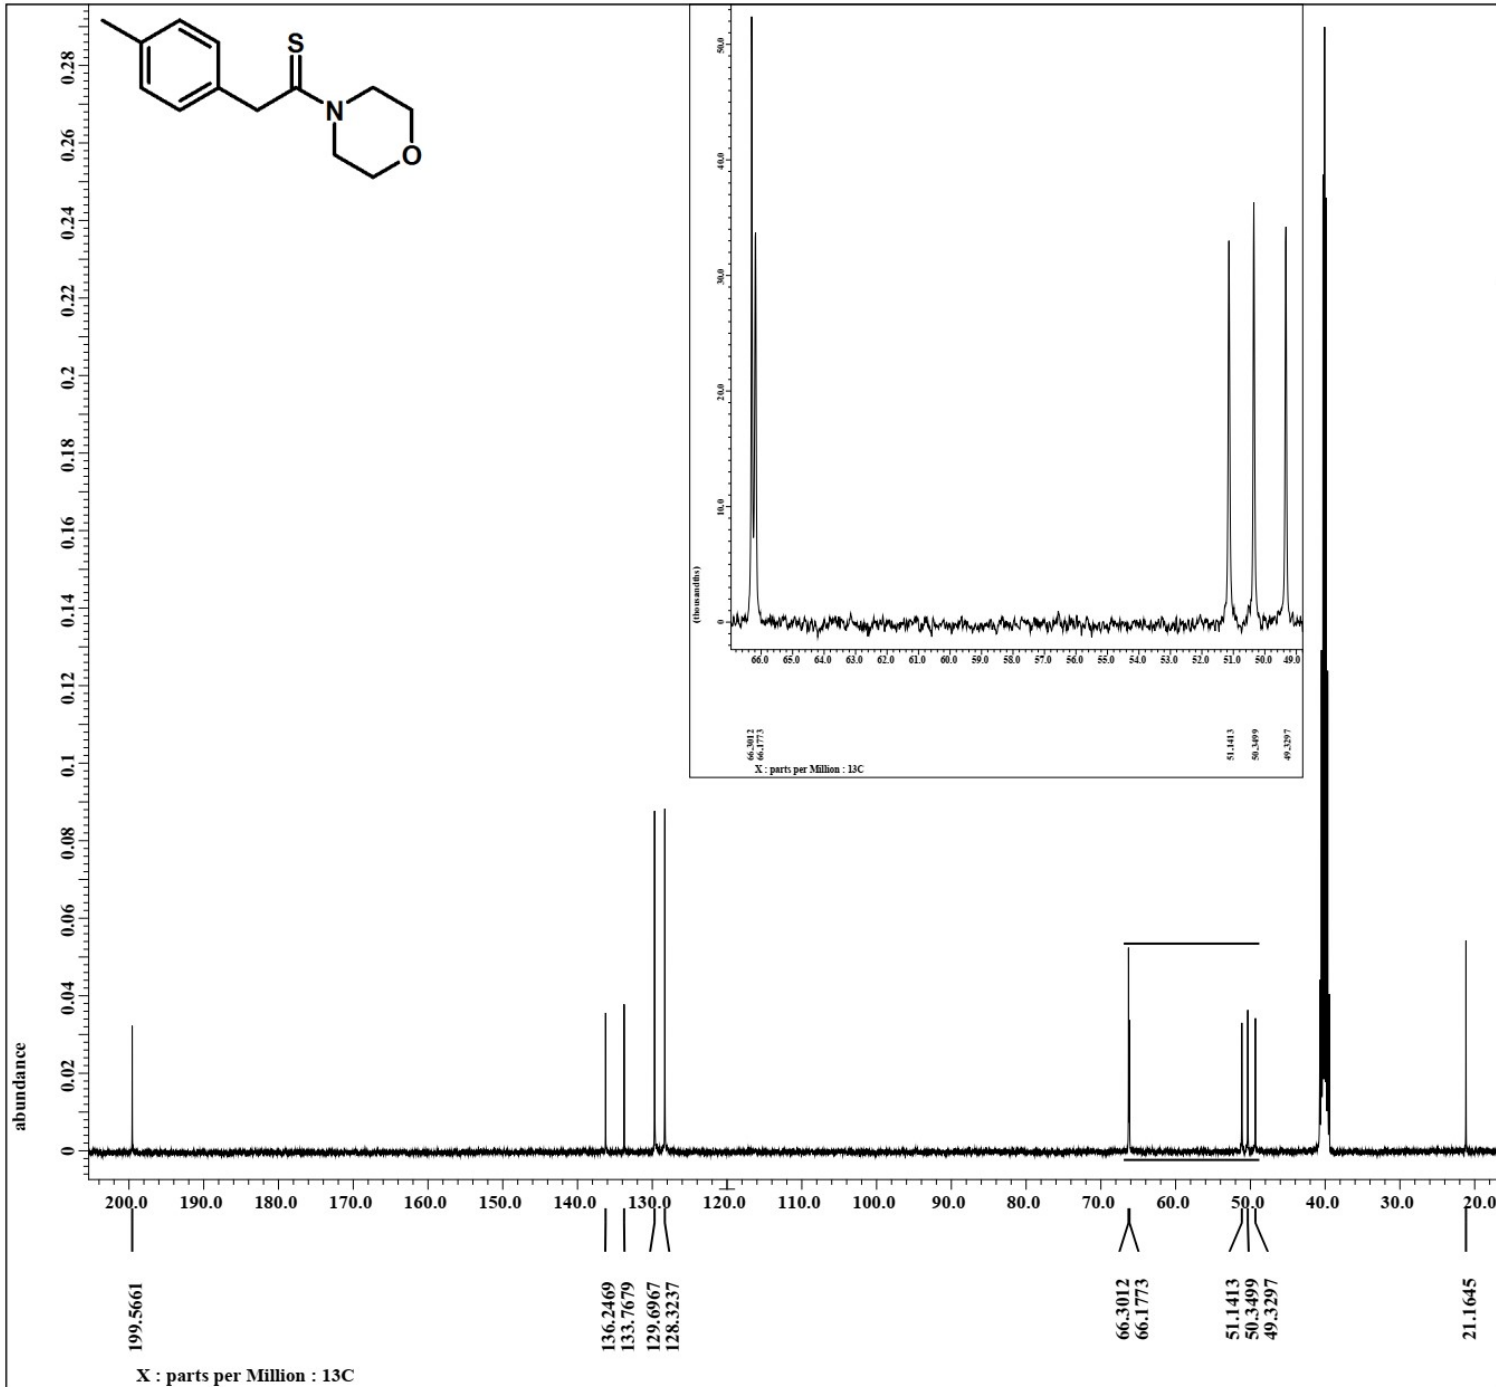

----- PROCESSING PARAMETERS -----  
 dc balance : 0 : FALSE  
 seXp : 2.0[Hz] : 0.0[s]  
 trapezoid3 : 0[%] : 80[%] : 100[%]  
 zerofill : 1  
 fft : 1 : TRUE : TRUE  
 machinephase  
 ppm

Derived from: MED\_13C\_4-MePhCH2CSMorph-1

Filename = MED\_13C\_4-MePhCH2CSMo  
 Author = delta  
 Experiment = single pulse dec  
 Sample\_id = MED\_4-MePhCH2CSMorph  
 Solvent = DMSO-D6  
 Creation\_time = 21-AUG-2023 05:43:12  
 Revision\_time = 21-AUG-2023 11:02:20  
 Current\_time = 21-AUG-2023 11:02:45

Comment = single pulse decouple  
 Data\_format = 1D COMPLEX  
 Dim\_size = 26214  
 Dim\_title = 13C  
 Dim\_units = [ppm]  
 Dimensions = X  
 Site = ECX 400  
 Spectrometer = JNM-ECX400

Field\_strength = 9.389766[T] (400[MHz])  
 X\_acq\_duration = 1.04333312[s]  
 X\_domain = 13C  
 X\_freq = 100.52530333[MHz]  
 X\_offset = 120[ppm]  
 X\_points = 32768  
 X\_prescans = 4  
 X\_resolution = 0.95846665[Hz]  
 X\_sweep = 31.40703518[kHz]  
 Irr\_domain = 1H  
 Irr\_freq = 399.78219838[MHz]  
 Irr\_offset = 5[ppm]  
 Clipped = FALSE  
 Mod\_return = 1  
 Scans = 5000  
 Total\_scans = 5000

X\_90\_width = 13.87[us]  
 X\_acq\_time = 1.04333312[s]  
 X\_angle = 30[deg]  
 X\_atn = 5.2[dB]  
 X\_pulse = 4.62333333[us]  
 Irr\_atn\_dec = 29.907[dB]  
 Irr\_atn\_noe = 29.907[dB]  
 Irr\_noise = WALTZ  
 Decoupling = TRUE  
 Initial\_wait = 1[s]  
 Noe = TRUE  
 Noe\_time = 2[s]  
 Recvr\_gain = 48  
 Relaxation\_delay = 2[s]  
 Repetition\_time = 3.04333312[s]  
 Temp\_get = 0[dc]

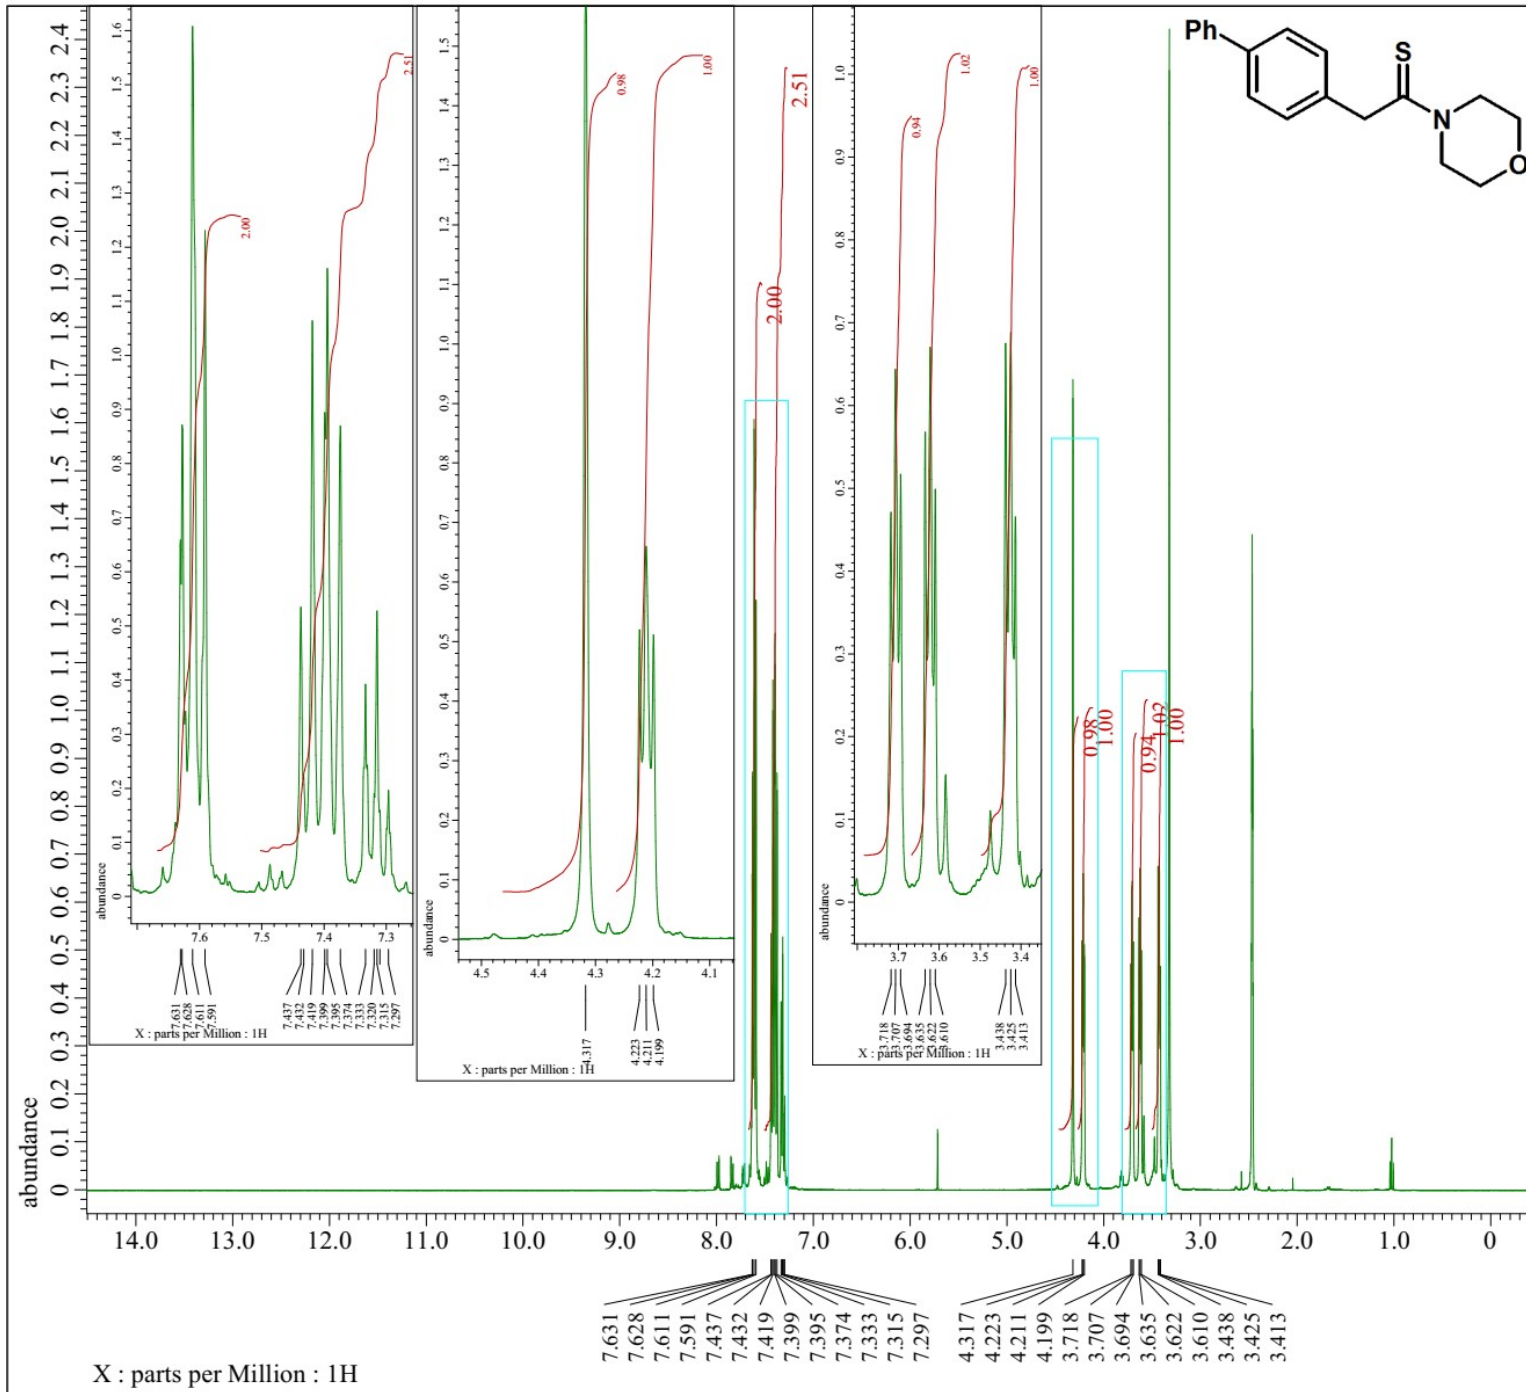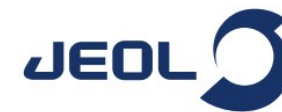

---- PROCESSING PARAMETERS ----  
 sexp( 0.2[Hz], 0.0[s] )  
 trapezoid( 0[%], 0[%], 80[%], 100[%] )  
 zerofill( 1, TRUE )  
 fft( 1, TRUE, TRUE )  
 machinephase  
 ppm  
 Получено из: MED\_1H\_4-PhC6H4CH2CSMorph-1.jdf

Filename = MED\_1H\_4-PhC6H4CH2CSMorph  
 Author = delta  
 Experiment = single\_pulse.ex2  
 Sample Id = MED\_4-PhC6H4CH2CSMorph  
 Solvent = DMSO-D6  
 Actual\_Start\_Time = 12-JUL-2023 06:28:27  
 Revision\_Time = 12-JUL-2023 19:34:29

Comment = single\_pulse  
 Data\_Format = 1D\_COMPLEX  
 Dim\_Size = 26214  
 X\_Domain = 1H  
 Dim\_Title = 1H  
 Dim\_Units = [ppm]  
 Dimensions = X  
 Site = ECX 400  
 Spectrometer = JNM-ECX400

Field\_Strength = 9.389766[T] (400[MHz])  
 X\_Acq\_Duration = 4.36731904[s]  
 X\_Domain = 1H  
 X\_Freq = 399.78219838[MHz]  
 X\_Offset = 7[ppm]  
 X\_Points = 32768  
 X\_Prescans = 1  
 X\_Resolution = 0.22897343[Hz]  
 X\_Sweep = 7.5030012[kHz]  
 Irr\_Domain = 1H  
 Irr\_Freq = 399.78219838[MHz]  
 Irr\_Offset = 5[ppm]  
 Tri\_Domain = 1H  
 Tri\_Freq = 399.78219838[MHz]  
 Tri\_Offset = 5[ppm]  
 Clipped = FALSE  
 Scans = 8  
 Total\_Scans = 8

Relaxation\_Delay = 5[s]  
 Recvr\_Gain = 30  
 Temp\_Get = 0[dC]  
 X\_90\_Width = 5.5[us]  
 X\_Acq\_Time = 4.36731904[s]  
 X\_Angle = 45[deg]  
 X\_Atn = 3.5[dB]  
 X\_Pulse = 2.75[us]  
 Irr\_Mode = Off  
 Tri\_Mode = Off  
 Dante\_Presat = FALSE

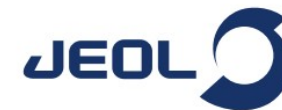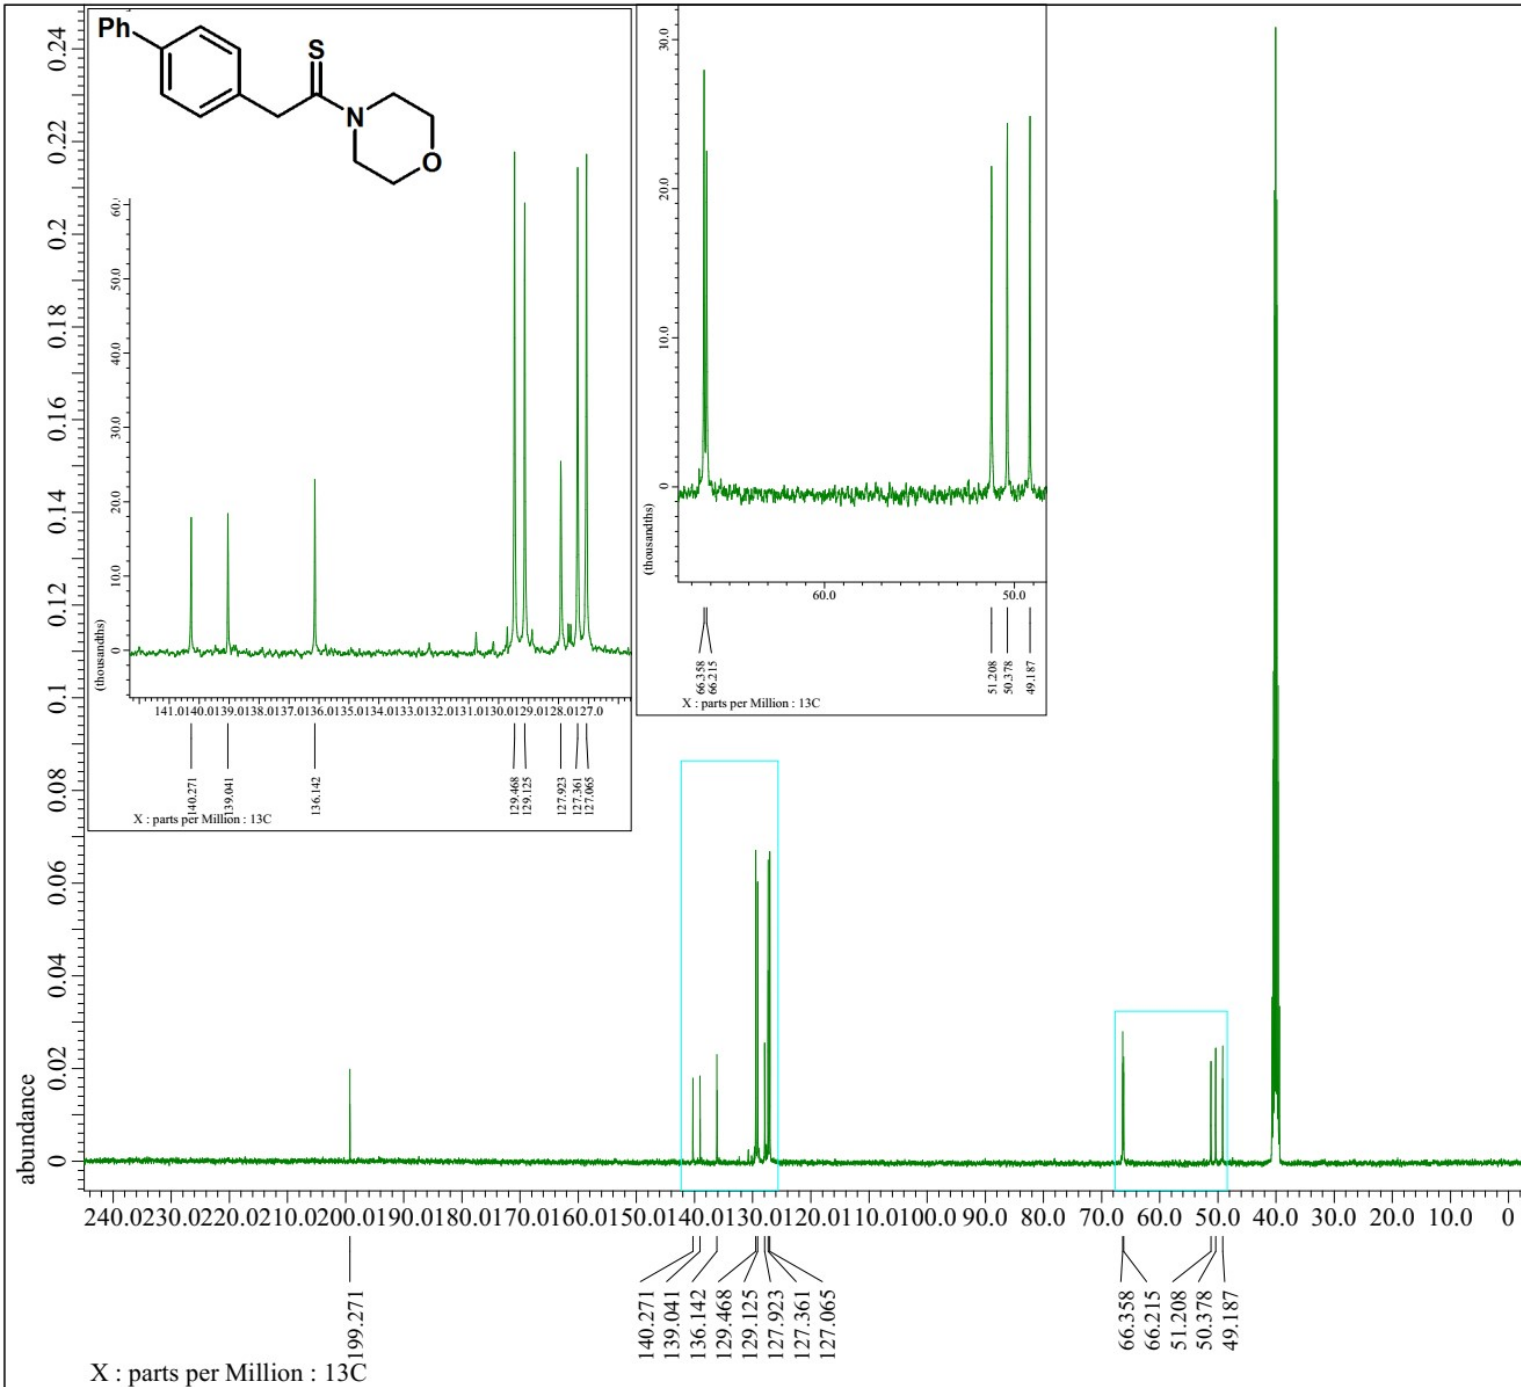

---- PROCESSING PARAMETERS ----  
sexp( 2.0[Hz], 0.0[s] )  
trapezoid( 0[%], 0[%], 80[%], 100[%] )  
zerofill( 1, TRUE )  
fft( 1, TRUE, TRUE )  
machinephase  
ppm

Получено из: MED\_13C\_4-PhC6H4CH2CSMorph-1.jdf

Filename = MED\_13C\_4-PhC6H4CH2CSMorp  
Author = delta  
Experiment = single\_pulse\_dec  
Sample Id = MED\_4-PhC6H4CH2CSMorph  
Solvent = DMSO-D6  
Actual\_Start\_Time = 12-JUL-2023 06:30:31  
Revision\_Time = 12-JUL-2023 19:44:43

Comment = single pulse decoupled ga  
Data\_Format = 1D COMPLEX  
Dim Size = 26214  
X\_Domain = 13C  
Dim Title = 13C  
Dim Units = [ppm]  
Dimensions = X  
Site = ECX 400  
Spectrometer = JNM-ECX400

Field Strength = 9.389766[T] (400[MHz])  
X\_Acq\_Duration = 1.04333312[s]  
X\_Domain = 13C  
X\_Freq = 100.52530333[MHz]  
X\_Offset = 120[ppm]  
X\_Points = 32768  
X\_Prescans = 4  
X\_Resolution = 0.95846665[Hz]  
X\_Sweep = 31.40703518[kHz]  
Irr\_Domain = 1H  
Irr\_Freq = 399.78219838[MHz]  
Irr\_Offset = 5[ppm]  
Clipped = FALSE  
Scans = 4000  
Total\_Scans = 4000

Relaxation\_Delay = 2[s]  
Recvr\_Gain = 46  
Temp\_Get = 0[dc]  
X\_90\_Width = 13.87[us]  
X\_Acq\_Time = 1.04333312[s]  
X\_Angle = 30[deg]  
X\_Atn = 5.2[dB]  
X\_Pulse = 4.62333333[us]  
Irr\_Atn\_Dec = 29.907[dB]  
Irr\_Atn\_Noise = 29.907[dB]  
Irr\_Noise = WALTZ  
Decoupling = TRUE  
Initial\_Wait = 1[s]  
Noe = TRUE



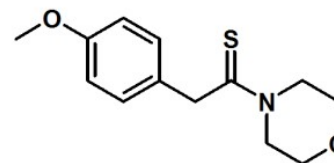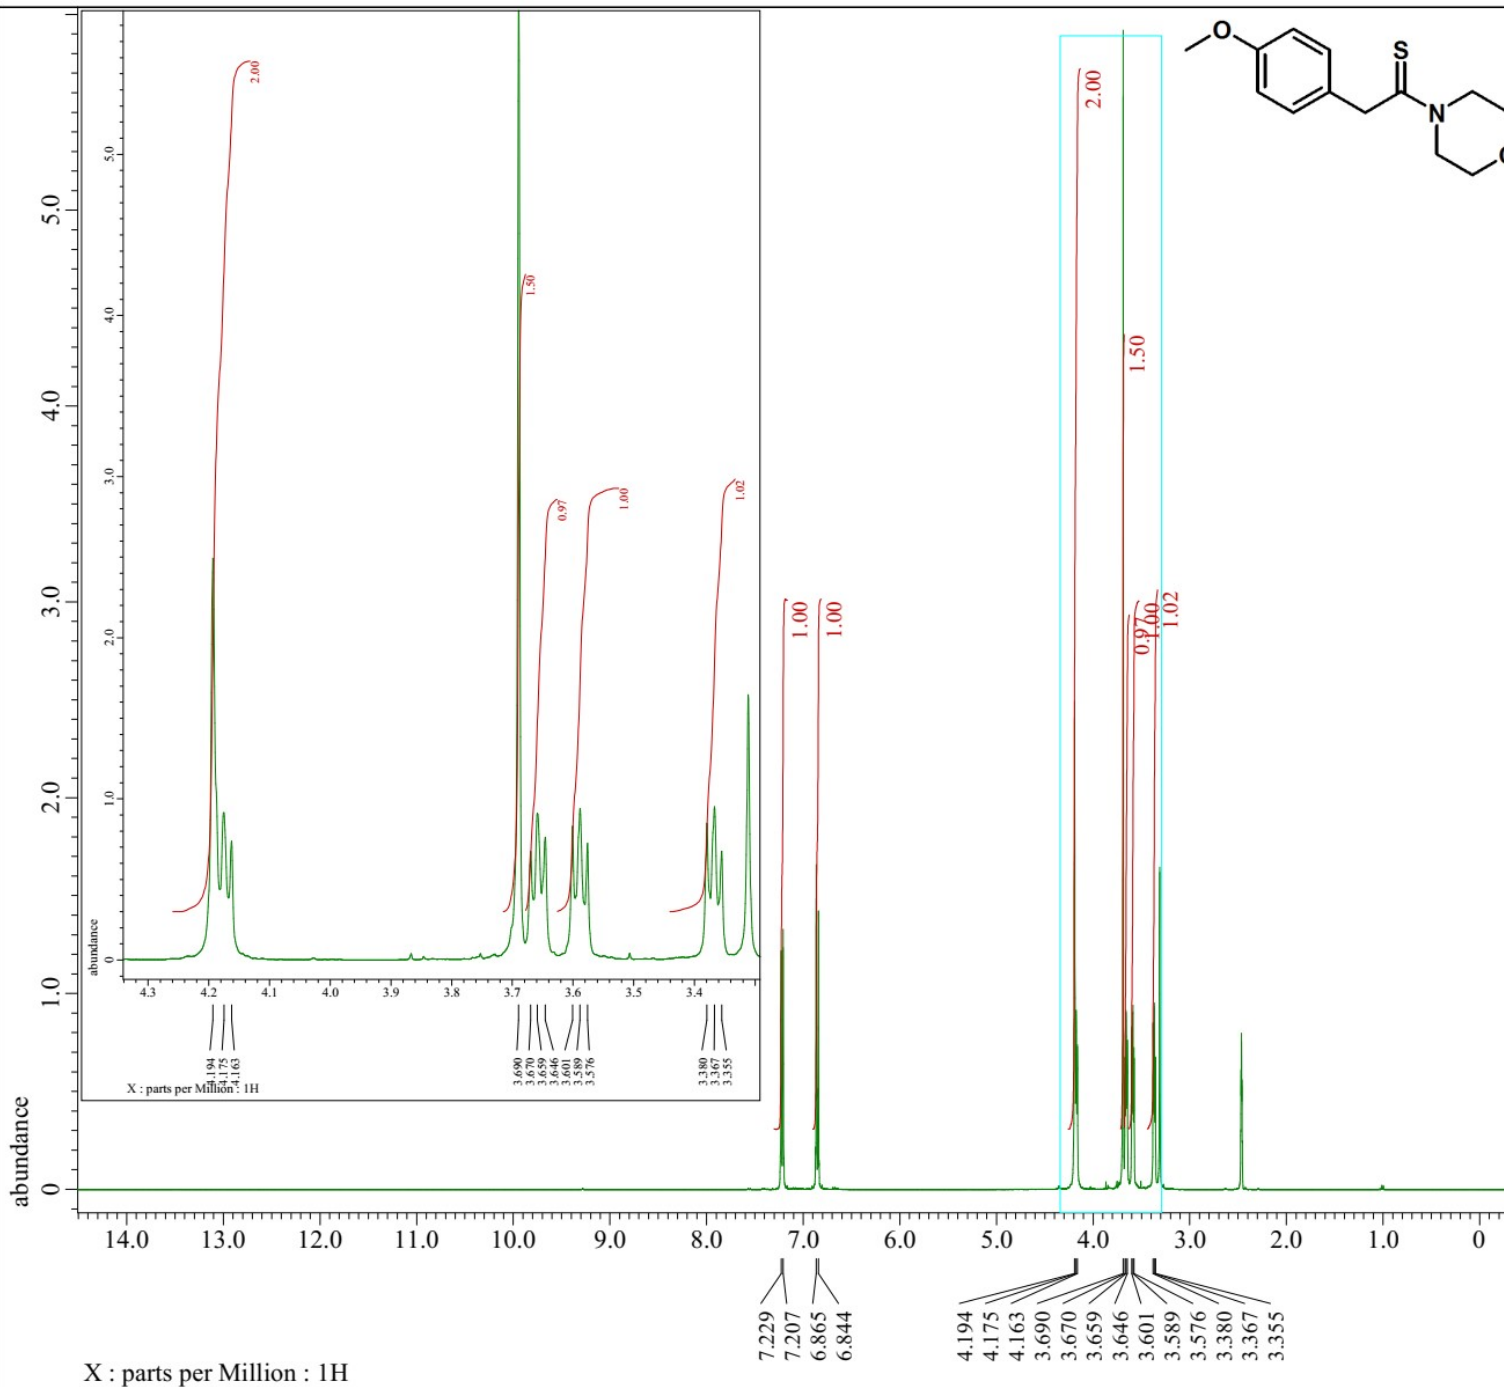

```

---- PROCESSING PARAMETERS ----
sexp( 0.2[Hz], 0.0[s] )
trapezoid( 0[%], 0[%], 80[%], 100[%] )
zerofill( 1, TRUE )
fft( 1, TRUE, TRUE )
machinephase
ppm
  
```

Получено из: MED\_1H\_4-MeOC6H4CH2CSMorph-1.jdf

```

Filename      = MED_1H_4-MeOC6H4CH2CSMorp
Author        = delta
Experiment    = single_pulse.ex2
Sample_Id     = MED_4-MeOC6H4CH2CSMorph
Solvent       = DMSO-D6
Actual_Start_Time = 11-JUL-2023 23:21:43
Revision_Time  = 12-JUL-2023 18:37:53
  
```

```

Comment       = single_pulse
Data_Format   = 1D COMPLEX
Dim_Size      = 26214
X_Domain      = 1H
Dim_Title     = 1H
Dim_Units     = [ppm]
Dimensions    = X
Site          = ECX 400
Spectrometer  = JNM-ECX400
  
```

```

Field_Strength = 9.389766[T] (400[MHz])
X_Acq_Duration = 4.36731904[s]
X_Domain       = 1H
X_Freq         = 399.78219838[MHz]
X_Offset       = 7[ppm]
X_Points       = 32768
X_Prescans     = 1
X_Resolution   = 0.22897343[Hz]
X_Sweep        = 7.5030012[kHz]
Irr_Domain     = 1H
Irr_Freq       = 399.78219838[MHz]
Irr_Offset     = 5[ppm]
Tri_Domain     = 1H
Tri_Freq       = 399.78219838[MHz]
Tri_Offset     = 5[ppm]
Clipped        = FALSE
Scans          = 8
Total_Scans    = 8
  
```

```

Relaxation_Delay = 5[s]
Recvr_Gain       = 26
Temp_Get         = 0[dC]
X_90_Width       = 5.5[us]
X_Acq_Time       = 4.36731904[s]
X_Angle          = 45[deg]
X_Atn            = 3.5[dB]
X_Pulse          = 2.75[us]
Irr_Mode         = Off
Tri_Mode         = Off
Dante_Presat     = FALSE
  
```



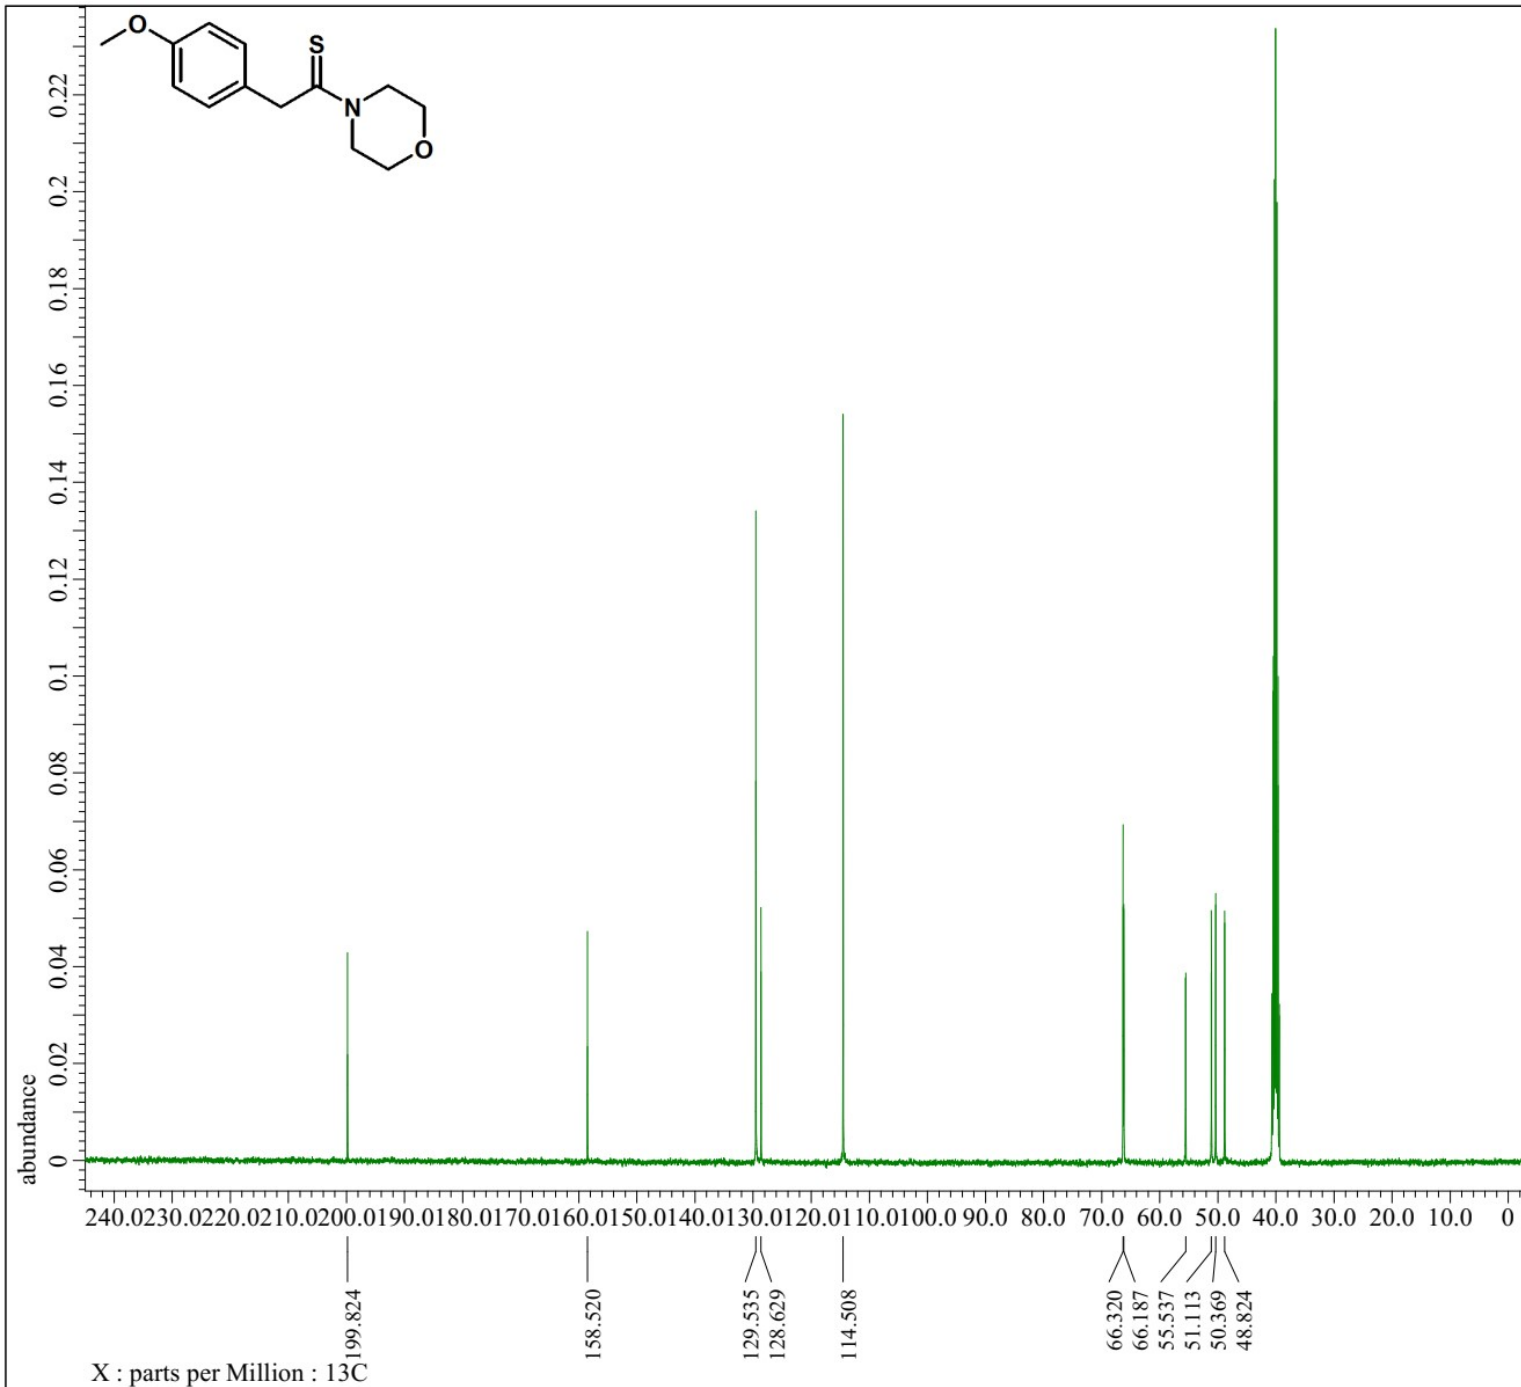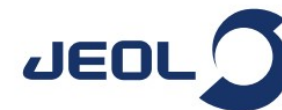

```

---- PROCESSING PARAMETERS ----
sexp( 2.0[Hz], 0.0[s] )
trapezoid( 0[%], 0[%], 80[%], 100[%] )
zerofill( 1, TRUE )
fft( 1, TRUE, TRUE )
machinephase
ppm
  
```

Получено из: MED\_13C\_4-MeOC6H4CH2CSMorph-1.jd

```

Filename      = MED_13C_4-MeOC6H4CH2CSMorph
Author        = delta
Experiment     = single_pulse_dec
Sample Id     = MED_4-MeOC6H4CH2CSMorph
Solvent       = DMSO-D6
Actual_Start Time = 11-JUL-2023 23:23:44
Revision_Time  = 12-JUL-2023 18:42:28
  
```

```

Comment       = single pulse decoupled ga
Data_Format   = 1D COMPLEX
Dim_Size      = 26214
X_Domain      = 13C
Dim_Title     = 13C
Dim_Units     = [ppm]
Dimensions    = X
Site          = ECX 400
Spectrometer  = JNM-ECX400
  
```

```

Field Strength = 9.389766[T] (400[MHz])
X_Acq_Duration = 1.04333312[s]
X_Domain       = 13C
X_Freq         = 100.52530333[MHz]
X_Offset       = 120[ppm]
X_Points       = 32768
X_Prescans     = 4
X_Resolution   = 0.95846665[Hz]
X_Sweep        = 31.40703518[kHz]
Irr_Domain     = 1H
Irr_Freq       = 399.78219838[MHz]
Irr_Offset     = 5[ppm]
Clipped        = FALSE
Scans          = 4000
Total_Scans    = 4000
  
```

```

Relaxation_Delay = 2[s]
Recvr Gain       = 46
Temp_Get         = 0[dc]
X_90_Width       = 13.87[us]
X_Acq_Time       = 1.04333312[s]
X_Angle          = 30[deg]
X_Atn            = 5.2[dB]
X_Pulse          = 4.62333333[us]
Irr_Atn_Dec      = 29.907[dB]
Irr_Atn_Noise   = 29.907[dB]
Irr_Noise        = WALTZ
Decoupling       = TRUE
Initial_Wait     = 1[s]
Noe              = TRUE
  
```

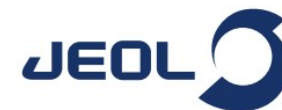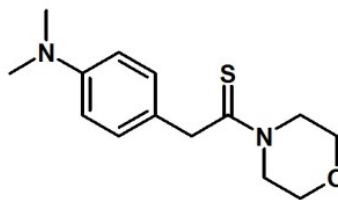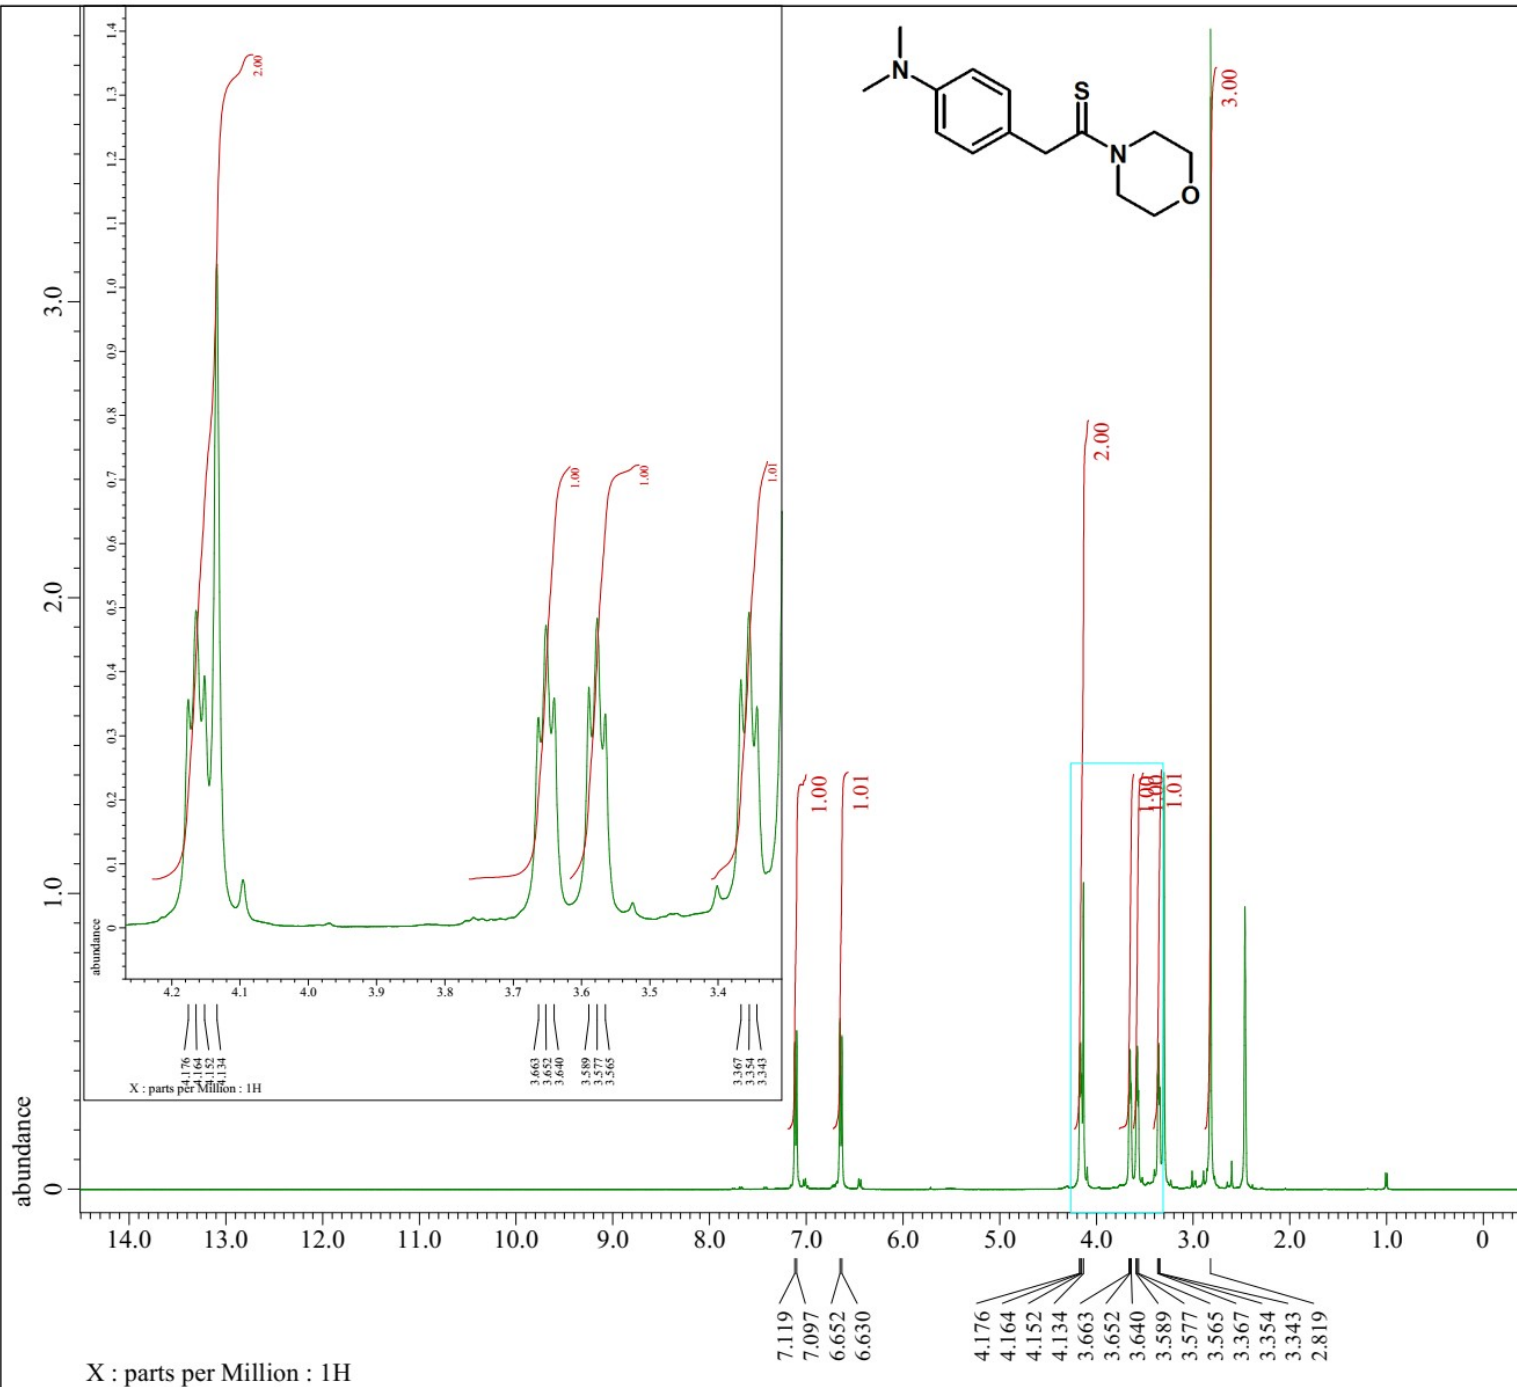

----- PROCESSING PARAMETERS -----  
sexp( 0.2[Hz], 0.0[s] )  
trapezoid( 0[%], 0[%], 80[%], 100[%] )  
zerofill( 1, TRUE )  
fft( 1, TRUE, TRUE )  
machinephase  
ppm

Получено из: MED\_1H\_4-NMe2C6H4CH2CSMorph-1.jd

Filename = MED\_1H\_4-NMe2C6H4CH2CSMorph  
Author = delta  
Experiment = single\_pulse.ex2  
Sample Id = MED\_4-NMe2C6H4CH2CSMorph  
Solvent = DMSO-D6  
Actual\_Start\_Time = 12-JUL-2023 02:59:01  
Revision\_Time = 12-JUL-2023 19:21:37

Comment = single\_pulse  
Data\_Format = 1D\_COMPLEX  
Dim\_Size = 26214  
X\_Domain = 1H  
Dim\_Title = 1H  
Dim\_Units = [ppm]  
Dimensions = X  
Site = ECX 400  
Spectrometer = JNM-ECX400

Field Strength = 9.389766[T] (400[MHz])  
X\_Acq\_Duration = 4.36731904[s]  
X\_Domain = 1H  
X\_Freq = 399.78219838[MHz]  
X\_Offset = 7[ppm]  
X\_Points = 32768  
X\_Prescans = 1  
X\_Resolution = 0.22897343[Hz]  
X\_Sweep = 7.5030012[kHz]  
Irr\_Domain = 1H  
Irr\_Freq = 399.78219838[MHz]  
Irr\_Offset = 5[ppm]  
Tri\_Domain = 1H  
Tri\_Freq = 399.78219838[MHz]  
Tri\_Offset = 5[ppm]  
Clipped = FALSE  
Scans = 8  
Total\_Scans = 8

Relaxation\_Delay = 5[s]  
Recvr\_Gain = 30  
Temp\_Get = 0[dC]  
X\_90\_Width = 5.5[us]  
X\_Acq\_Time = 4.36731904[s]  
X\_Angle = 45[deg]  
X\_Atn = 3.5[dB]  
X\_Pulse = 2.75[us]  
Irr\_Mode = Off  
Tri\_Mode = Off  
Dante\_Presat = FALSE

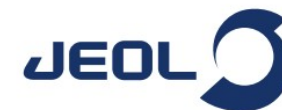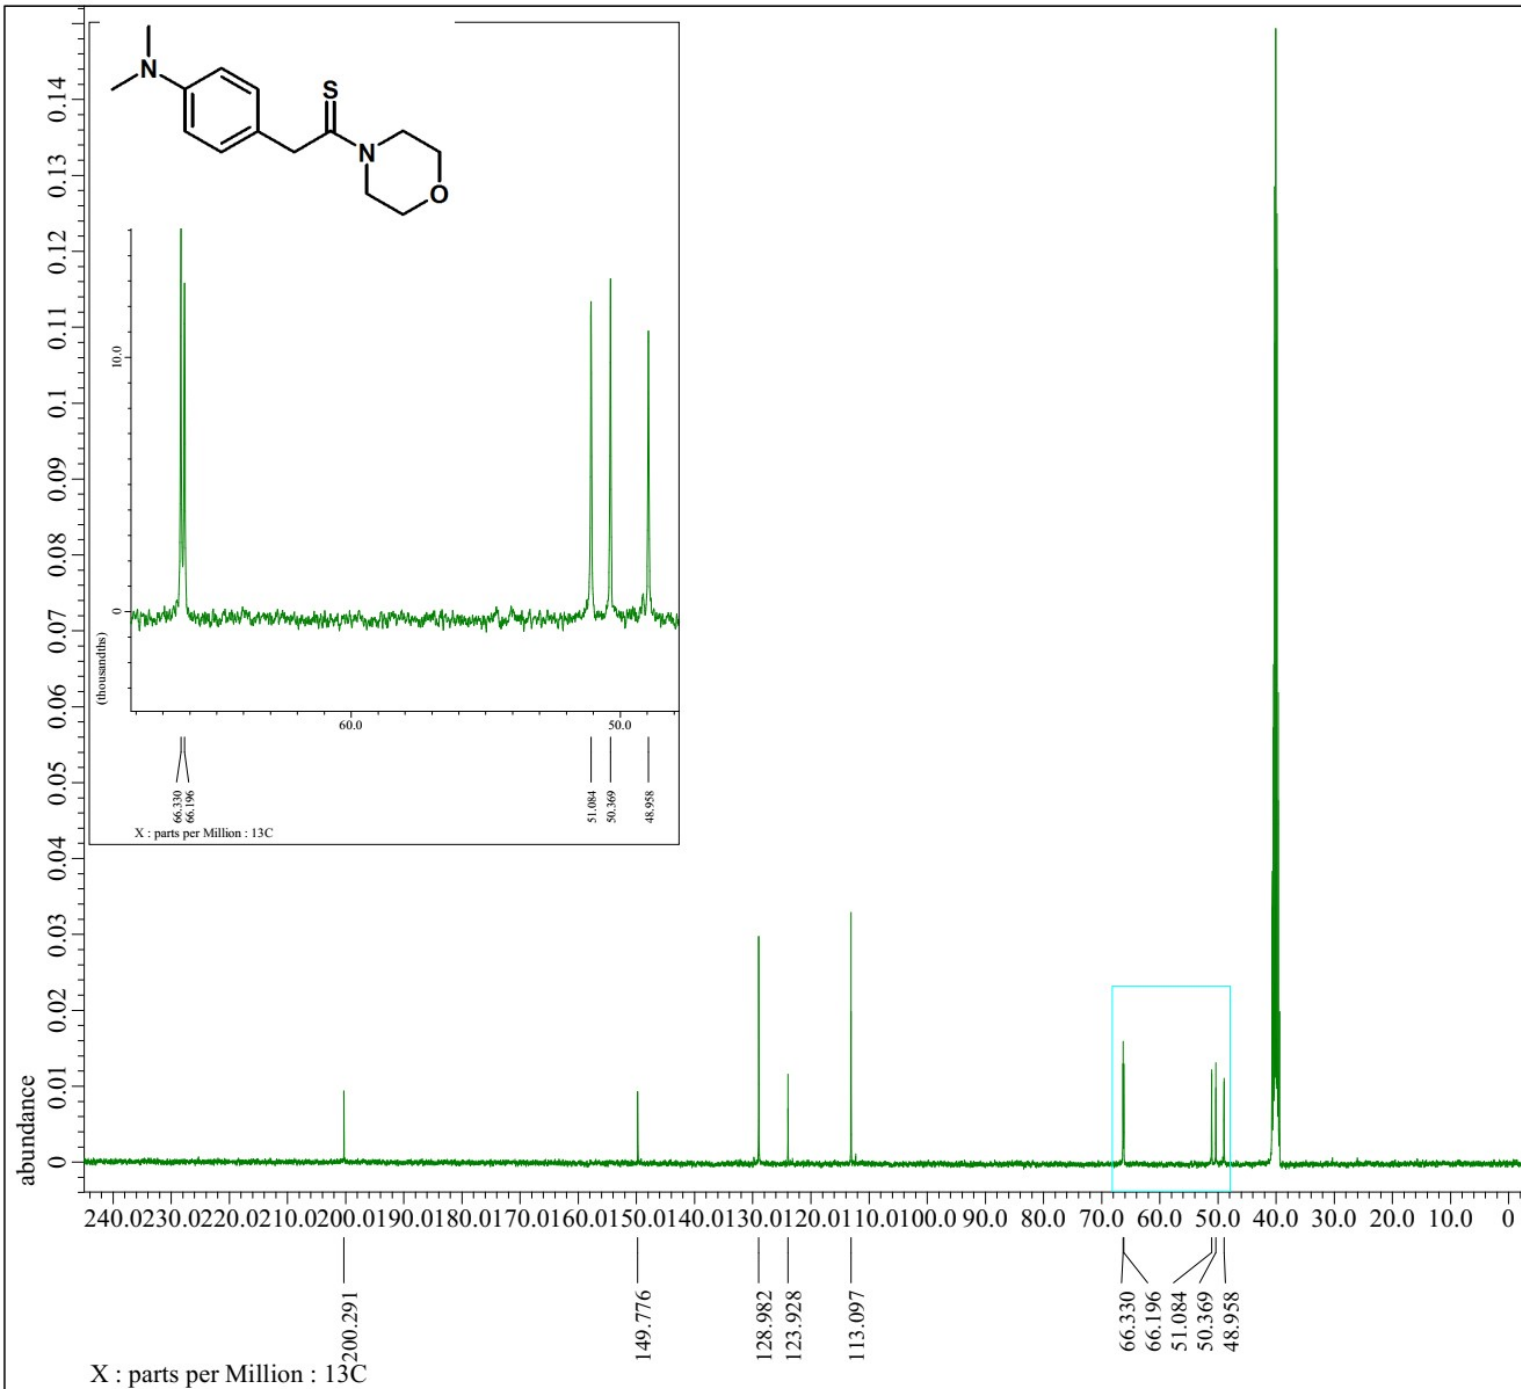

```
---- PROCESSING PARAMETERS ----
sexp( 2.0[Hz], 0.0[s] )
trapezoid( 0[%], 0[%], 80[%], 100[%] )
zerofill( 1, TRUE )
fft( 1, TRUE, TRUE )
machinephase
ppm
```

Получено из: MED\_13C\_4-NMe2C6H4CH2CSMorph-1.j

```
Filename      = MED_13C_4-NMe2C6H4CH2CSMo
Author       = delta
Experiment   = single_pulse_dec
Sample Id    = MED_4-NMe2C6H4CH2CSMorph
Solvent      = DMSO-D6
Actual_Start Time = 12-JUL-2023 03:00:56
Revision_Time = 12-JUL-2023 19:24:29
```

```
Comment      = single pulse decoupled ga
Data_Format  = 1D COMPLEX
Dim_Size     = 26214
X_Domain     = 13C
Dim_Title    = 13C
Dim_Units    = [ppm]
Dimensions   = X
Site         = ECX 400
Spectrometer = JNM-ECX400
```

```
Field Strength = 9.389766[T] (400[MHz])
X_Acq_Duration = 1.04333312[s]
X_Domain       = 13C
X_Freq         = 100.52530333[MHz]
X_Offset       = 120[ppm]
X_Points       = 32768
X_Prescans     = 4
X_Resolution   = 0.95846665[Hz]
X_Sweep        = 31.40703518[kHz]
Irr_Domain     = 1H
Irr_Freq       = 399.78219838[MHz]
Irr_Offset     = 5[ppm]
Clipped        = FALSE
Scans          = 4000
Total_Scans    = 4000
```

```
Relaxation_Delay = 2[s]
Recvr_Gain       = 42
Temp_Get         = 0[dc]
X_90_Width      = 13.87[us]
X_Acq_Time      = 1.04333312[s]
X_Angle         = 30[deg]
X_Atn           = 5.2[dB]
X_Pulse         = 4.62333333[us]
Irr_Atn_Dec     = 29.907[dB]
Irr_Atn_Noise  = 29.907[dB]
Irr_Noise       = WALTZ
Decoupling      = TRUE
Initial_Wait    = 1[s]
Noe             = TRUE
```

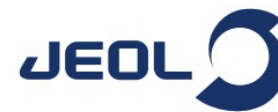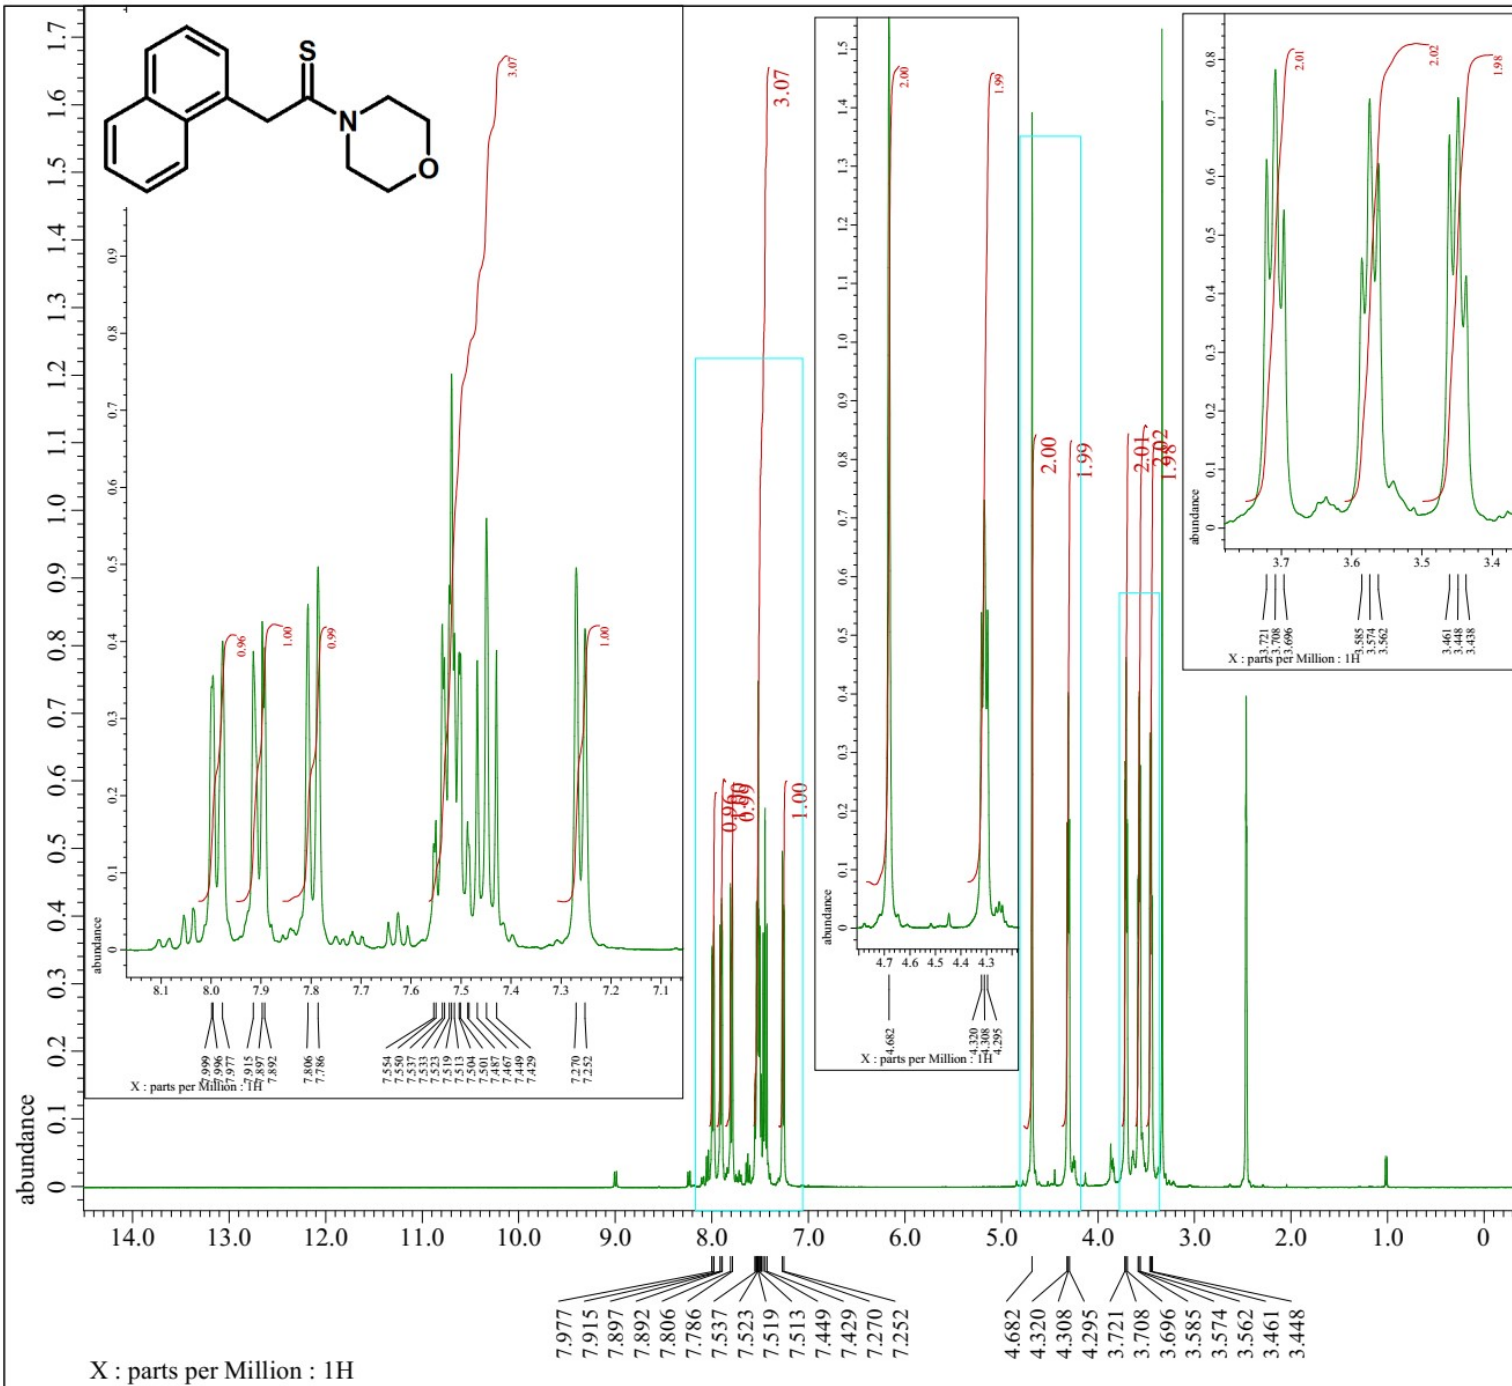

----- PROCESSING PARAMETERS -----  
sexp( 0.2[Hz], 0.0[s] )  
trapezoid( 0[%], 0[%], 80[%], 100[%] )  
zerofill( 1, TRUE )  
fft( 1, TRUE, TRUE )  
machinphase  
ppm  
Получено из: MED\_1H\_1-naphtoCH2CSMorph-1.jdf

Filename = MED\_1H\_1-naphtoCH2CSMorph  
Author = delta  
Experiment = single\_pulse.ex2  
Sample\_Id = MED\_1-naphtoCH2CSMorph  
Solvent = DMSO-D6  
Actual\_Start\_Time = 12-JUL-2023 21:06:23  
Revision\_Time = 13-JUL-2023 13:54:18

Comment = single\_pulse  
Data\_Format = 1D COMPLEX  
Dim\_Size = 26214  
X\_Domain = 1H  
Dim\_Title = 1H  
Dim\_Units = [ppm]  
Dimensions = X  
Site = ECX 400  
Spectrometer = JNM-ECX400

Field\_Strength = 9.389766[T] (400[MHz])  
X\_Acq\_Duration = 4.36731904[s]  
X\_Domain = 1H  
X\_Freq = 399.78219838[MHz]  
X\_Offset = 7[ppm]  
X\_Points = 32768  
X\_Prescans = 1  
X\_Resolution = 0.22897343[Hz]  
X\_Sweep = 7.5030012[kHz]  
Irr\_Domain = 1H  
Irr\_Freq = 399.78219838[MHz]  
Irr\_Offset = 5[ppm]  
Tri\_Domain = 1H  
Tri\_Freq = 399.78219838[MHz]  
Tri\_Offset = 5[ppm]  
Clipped = FALSE  
Scans = 8  
Total\_Scans = 8

Relaxation\_Delay = 5[s]  
Recvr\_Gain = 26  
Temp\_Get = 0[dC]  
X\_90\_Width = 5.5[us]  
X\_Acq\_Time = 4.36731904[s]  
X\_Angle = 45[deg]  
X\_Atn = 3.5[dB]  
X\_Pulse = 2.75[us]  
Irr\_Mode = Off  
Tri\_Mode = Off  
Dante\_Presat = FALSE



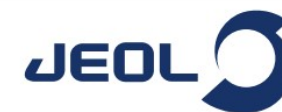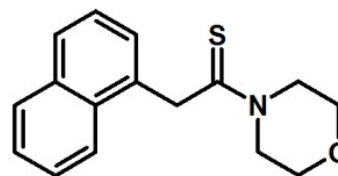

---- PROCESSING PARAMETERS ----  
sexp( 2.0[Hz], 0.0[s] )  
trapezoid( 0[%], 0[%], 80[%], 100[%] )  
zerofill( 1, TRUE )  
fft( 1, TRUE, TRUE )  
machinephase  
ppm  
Получено из: MED\_13C\_1-naphtoCH2CSMorph-1.jdf

Filename = MED\_13C\_1-naphtoCH2CSMorp  
Author = delta  
Experiment = single\_pulse\_dec  
Sample Id = MED\_1-naphtoCH2CSMorph  
Solvent = DMSO-D6  
Actual\_Start\_Time = 12-JUL-2023 21:08:24  
Revision\_Time = 13-JUL-2023 13:59:04

Comment = single pulse decoupled ga  
Data\_Format = 1D COMPLEX  
Dim\_Size = 26214  
X\_Domain = 13C  
Dim\_Title = 13C  
Dim\_Units = [ppm]  
Dimensions = X  
Site = ECX 400  
Spectrometer = JNM-ECX400

Field\_Strength = 9.389766[T] (400[MHz])  
X\_Acq\_Duration = 1.04333312[s]  
X\_Domain = 13C  
X\_Freq = 100.52530333[MHz]  
X\_Offset = 120[ppm]  
X\_Points = 32768  
X\_Prescans = 4  
X\_Resolution = 0.95846665[Hz]  
X\_Sweep = 31.40703518[kHz]  
Irr\_Domain = 1H  
Irr\_Freq = 399.78219838[MHz]  
Irr\_Offset = 5[ppm]  
Clipped = FALSE  
Scans = 4000  
Total\_Scans = 4000

Relaxation\_Delay = 2[s]  
Recvr\_Gain = 46  
Temp\_Get = 0[dC]  
X\_90\_Width = 13.87[us]  
X\_Acq\_Time = 1.04333312[s]  
X\_Angle = 30[deg]  
X\_Atn = 5.2[dB]  
X\_Pulse = 4.62333333[us]  
Irr\_Atn\_Dec = 29.907[dB]  
Irr\_Atn\_No = 29.907[dB]  
Irr\_Noise = WALTZ  
Decoupling = TRUE  
Initial\_Wait = 1[s]  
Noe = TRUE

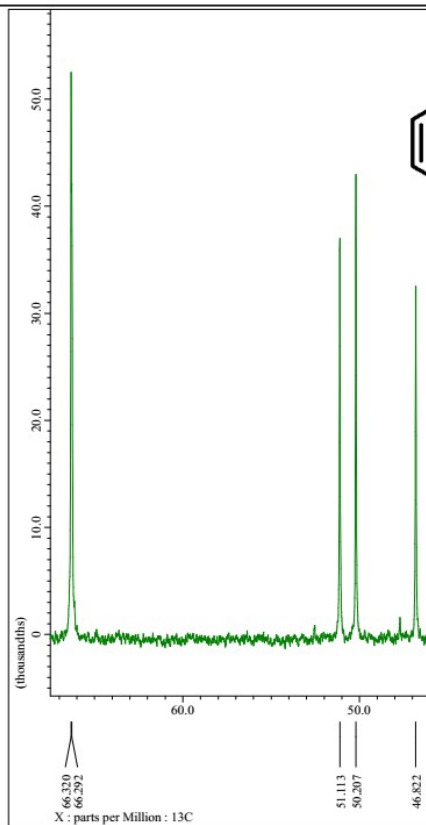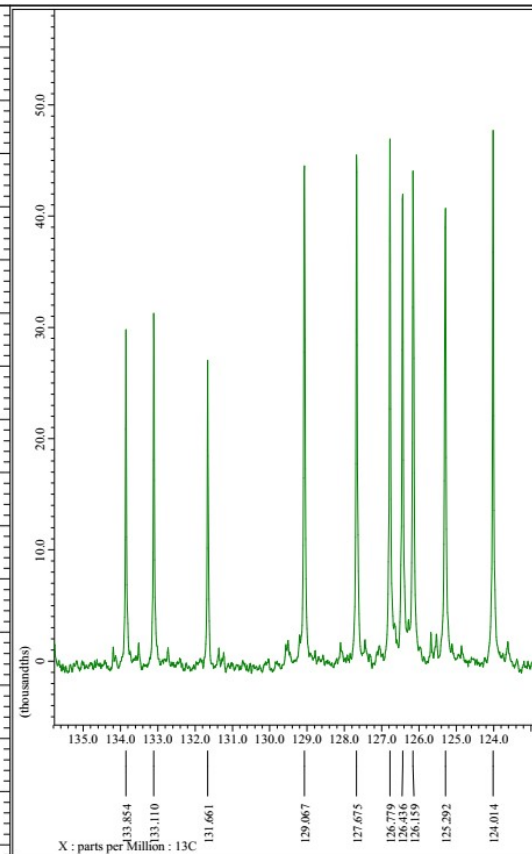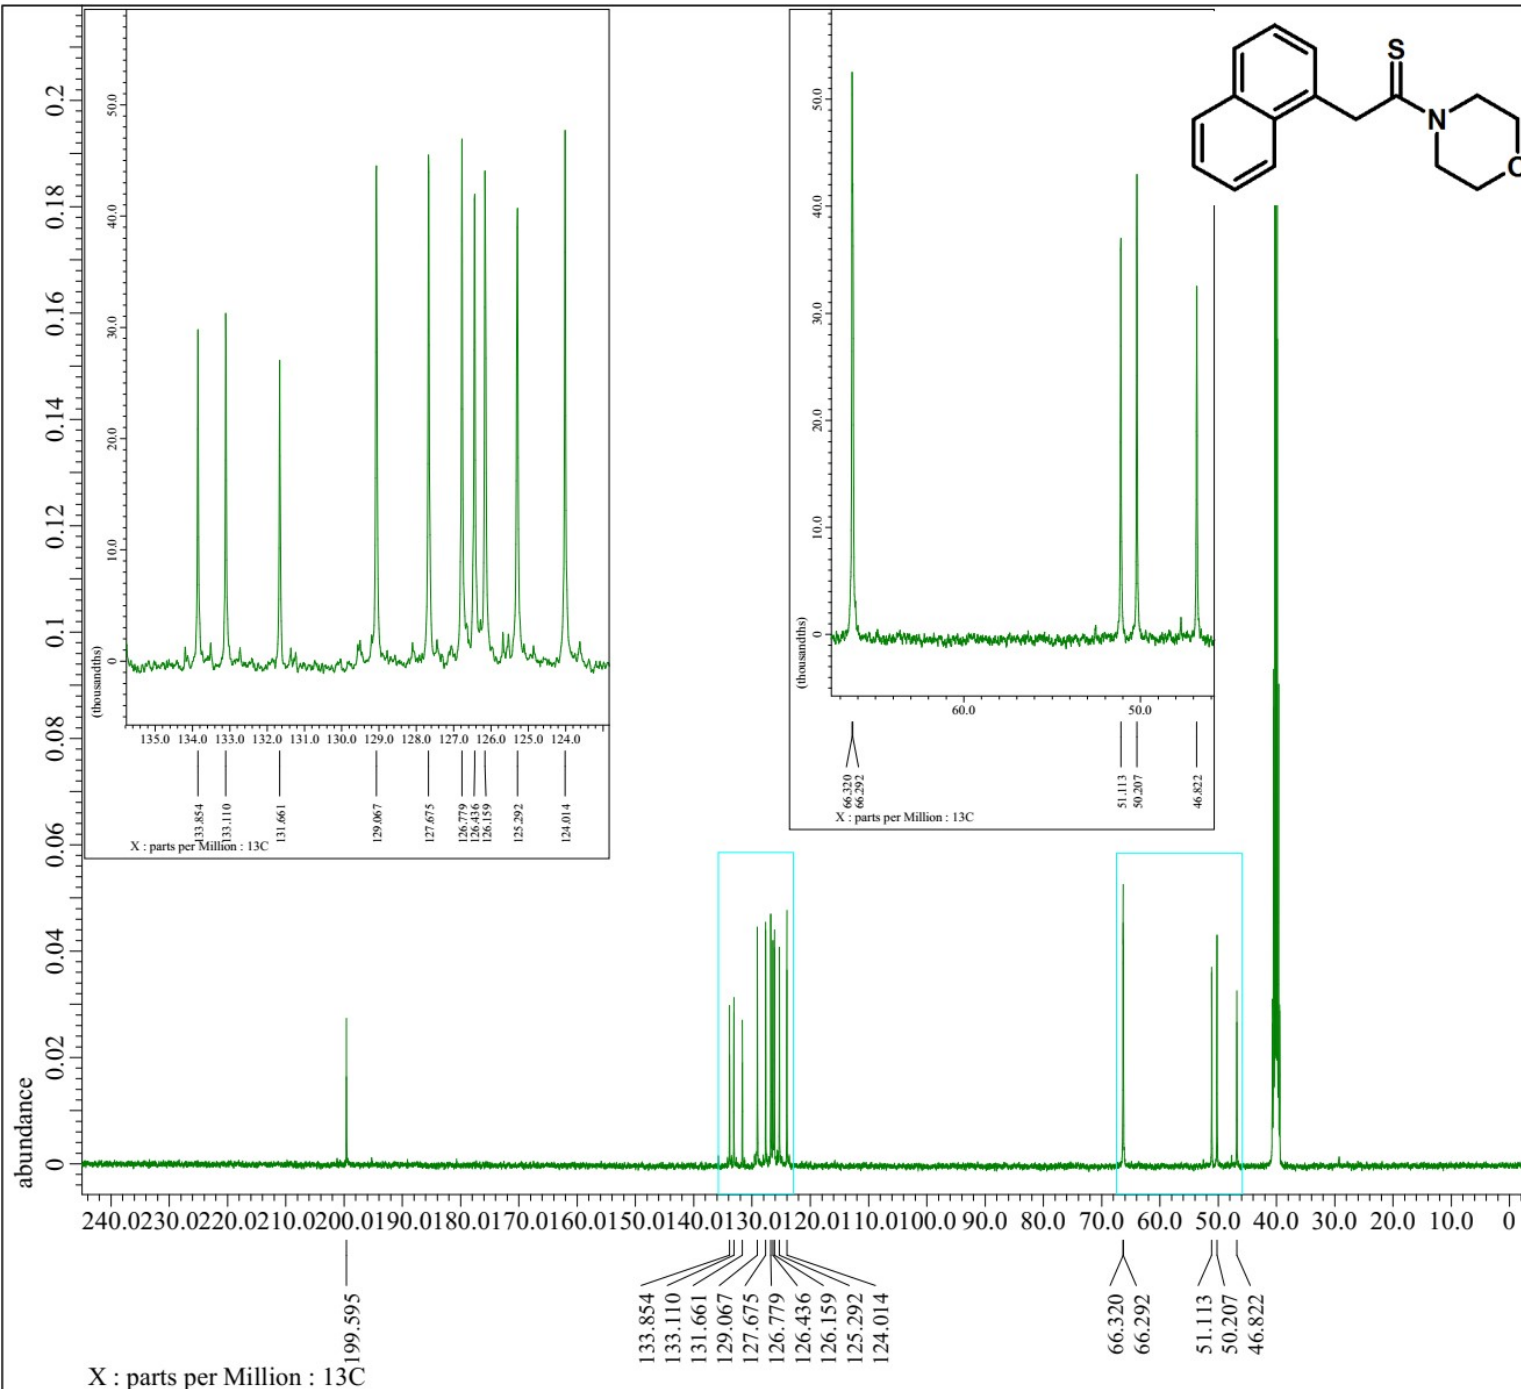



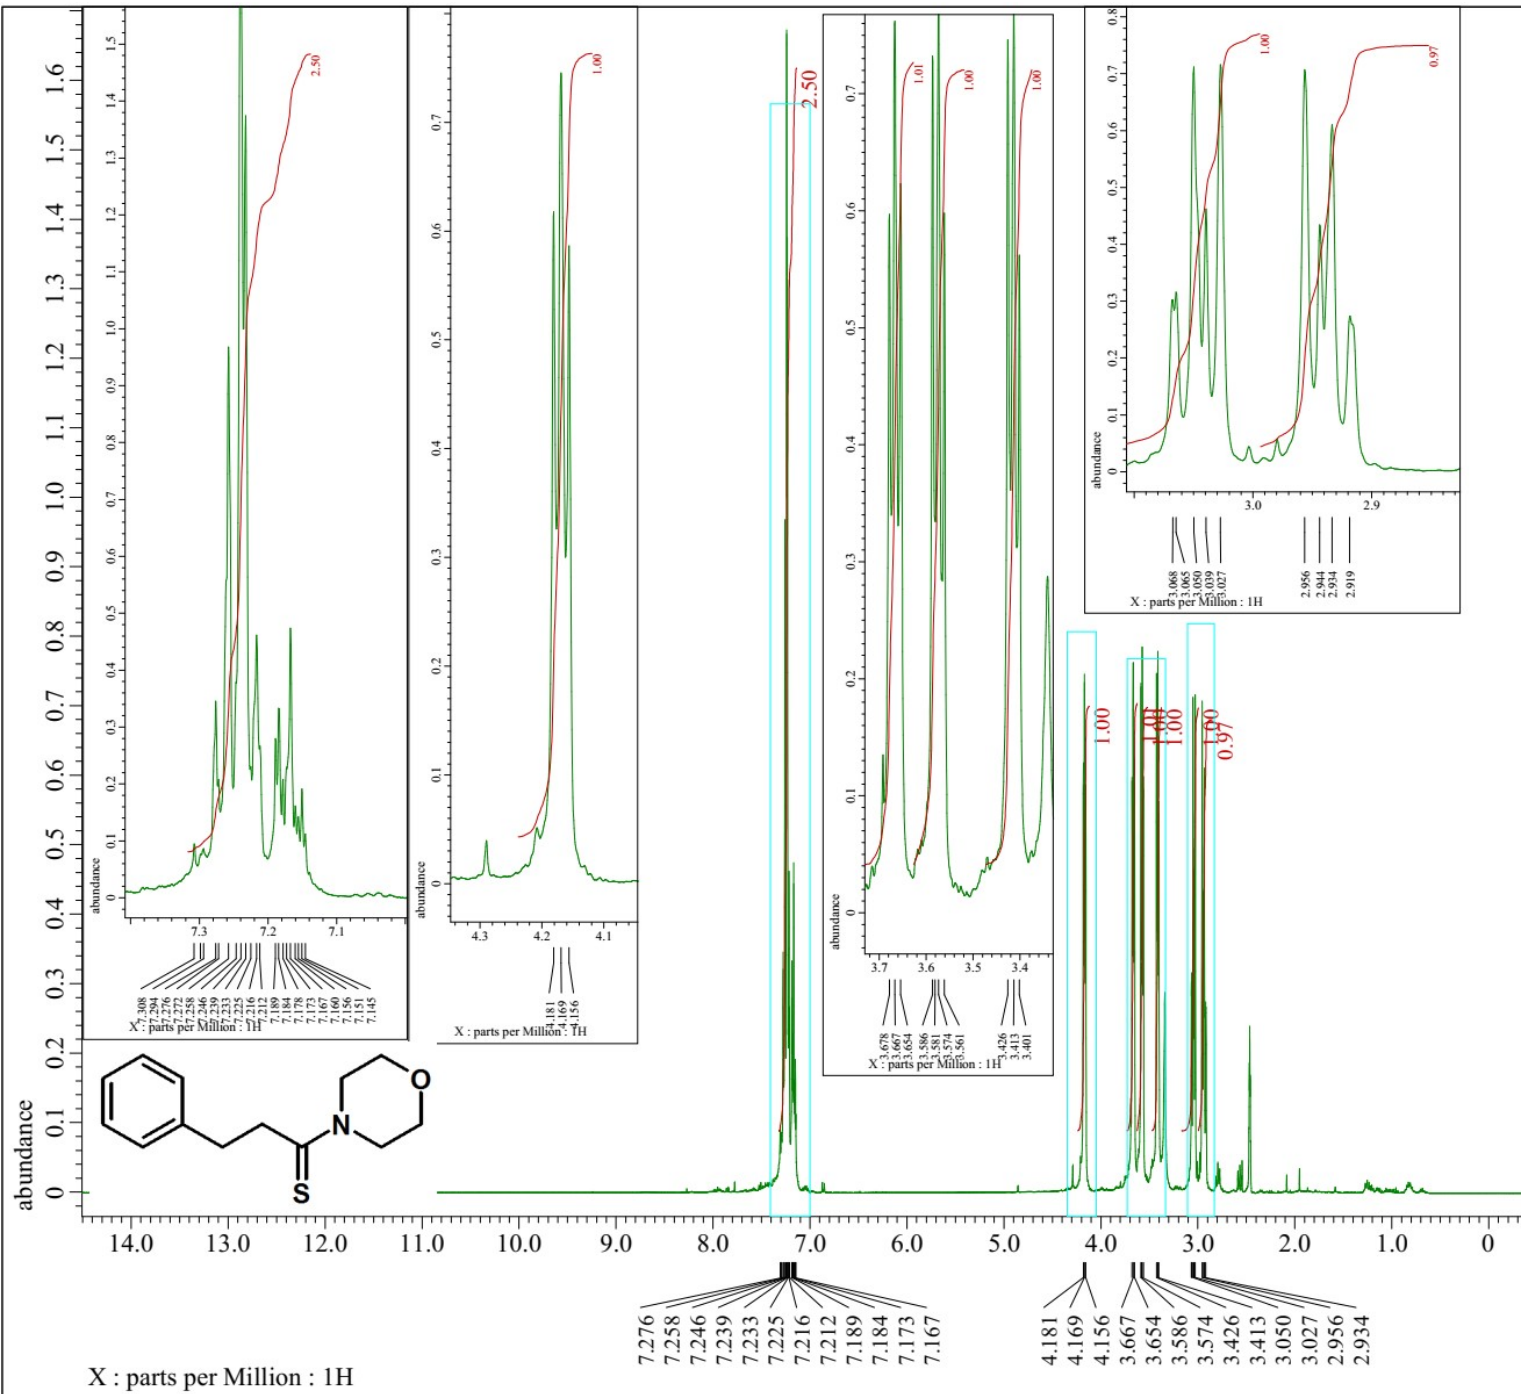

---- PROCESSING PARAMETERS ----  
sexp( 0.2[Hz], 0.0[s] )  
trapezoid( 0[%], 0[%], 80[%], 100[%] )  
zerofill( 1, TRUE )  
fft( 1, TRUE, TRUE )  
machinephase  
ppm

Получено из: MED\_1H\_C6H5CH2CH2CSMorph-1.jdf

Filename = MED\_1H\_C6H5CH2CH2CSMorph-  
Author = delta  
Experiment = single\_pulse.ex2  
Sample Id = MED\_C6H5CH2CH2CSMorph  
Solvent = DMSO-D6  
Actual\_Start\_Time = 13-JUL-2023 00:36:23  
Revision\_Time = 13-JUL-2023 15:03:59

Comment = single\_pulse  
Data\_Format = 1D COMPLEX  
Dim\_Size = 26214  
X\_Domain = 1H  
Dim\_Title = 1H  
Dim\_Units = [ppm]  
Dimensions = X  
Site = ECX 400  
Spectrometer = JNM-ECX400

Field\_Strength = 9.389766[T] (400[MHz])  
X\_Acq\_Duration = 4.36731904[s]  
X\_Domain = 1H  
X\_Freq = 399.78219838[MHz]  
X\_Offset = 7[ppm]  
X\_Points = 32768  
X\_Prescans = 1  
X\_Resolution = 0.22897343[Hz]  
X\_Sweep = 7.5030012[kHz]  
Irr\_Domain = 1H  
Irr\_Freq = 399.78219838[MHz]  
Irr\_Offset = 5[ppm]  
Tri\_Domain = 1H  
Tri\_Freq = 399.78219838[MHz]  
Tri\_Offset = 5[ppm]  
Clipped = FALSE  
Scans = 8  
Total\_Scans = 8

Relaxation\_Delay = 5[s]  
Recvr\_Gain = 18  
Temp\_Get = 0[dC]  
X\_90\_Width = 5.5[us]  
X\_Acq\_Time = 4.36731904[s]  
X\_Angle = 45[deg]  
X\_Atn = 3.5[dB]  
X\_Pulse = 2.75[us]  
Irr\_Mode = Off  
Tri\_Mode = Off  
Dante\_Presat = FALSE

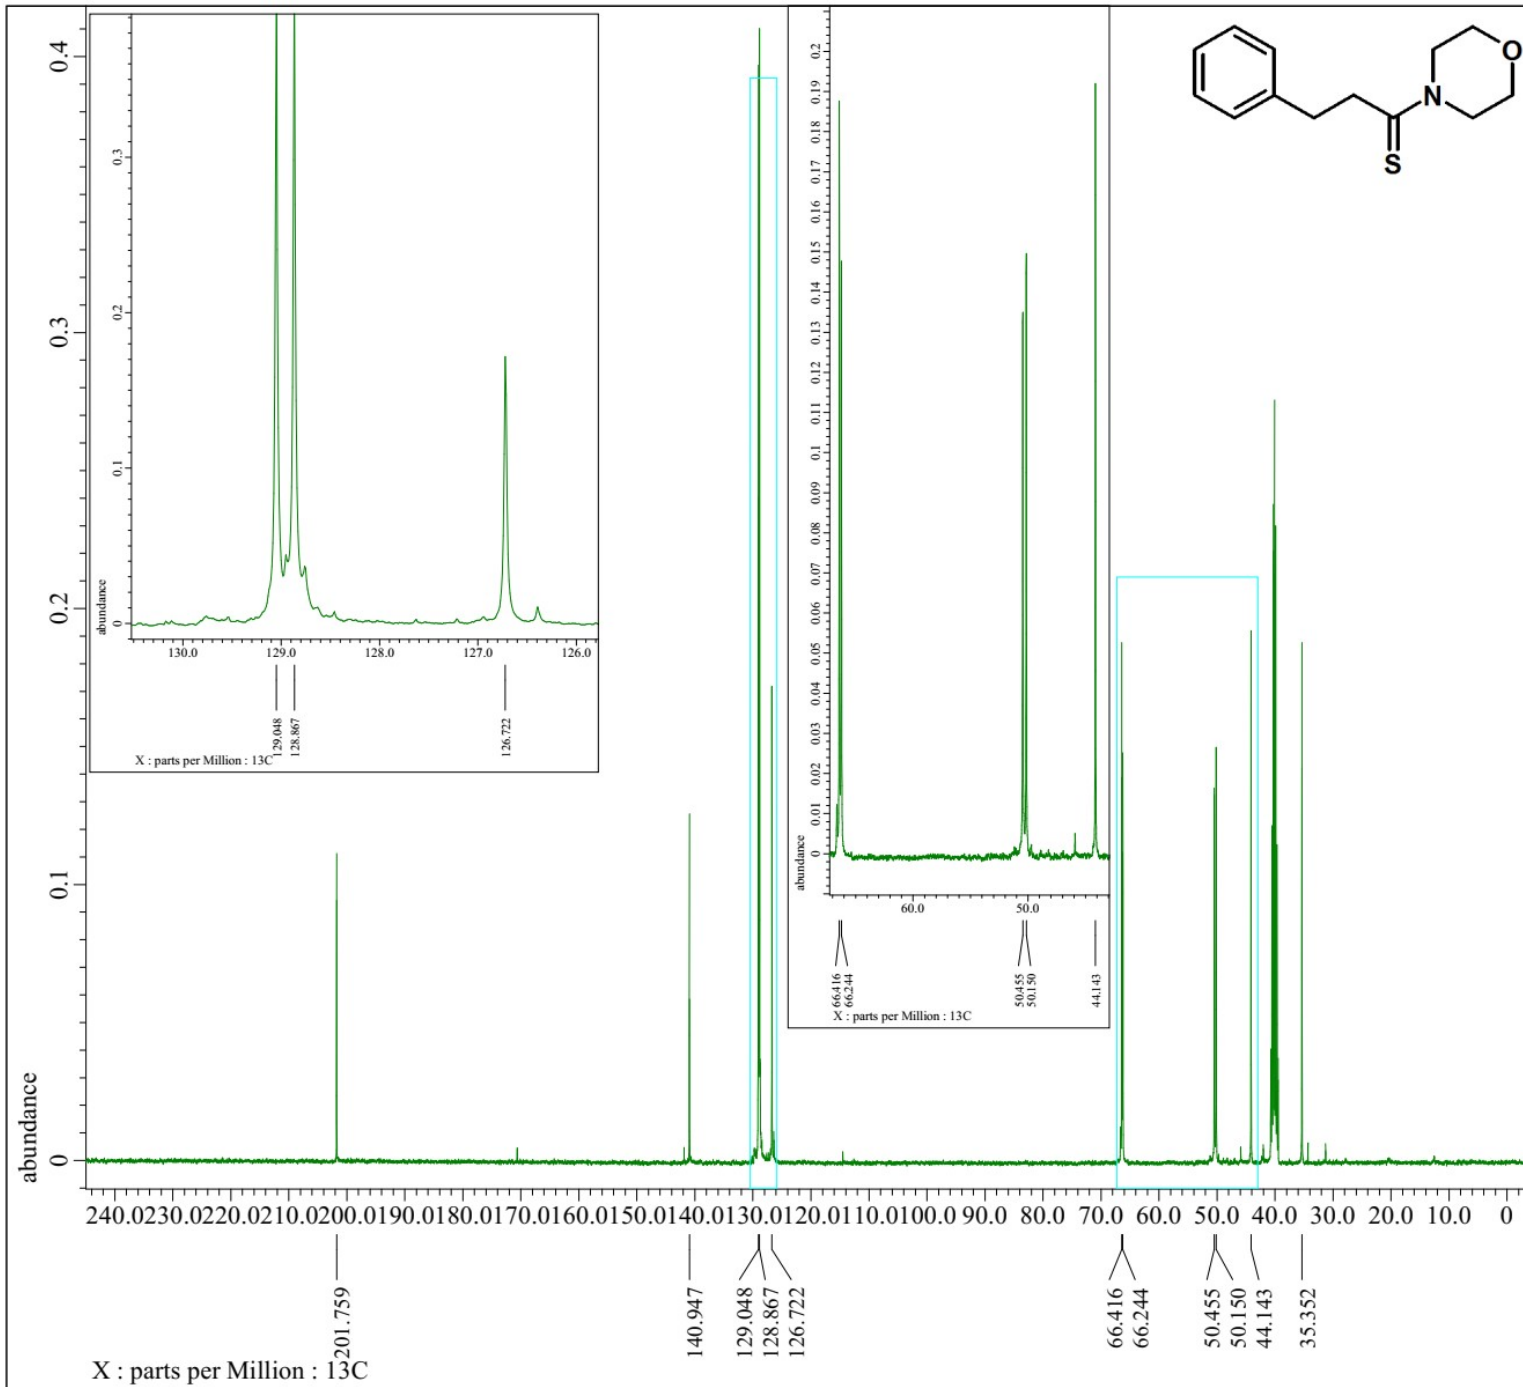

```

---- PROCESSING PARAMETERS ----
sexp( 2.0[Hz], 0.0[s] )
trapezoid( 0[%], 0[%], 80[%], 100[%] )
zerofill( 1, TRUE )
fft( 1, TRUE, TRUE )
machinephase
ppm
Получено из: MED_13C_C6H5CH2CH2CSMorph-1.jdf

```

```

Filename      = MED_13C_C6H5CH2CH2CSMorph
Author        = delta
Experiment    = single_pulse_dec
Sample Id     = MED_C6H5CH2CH2CSMorph
Solvent       = DMSO-D6
Actual_Start_Time = 13-JUL-2023 00:38:30
Revision_Time  = 13-JUL-2023 15:20:12

```

```

Comment       = single pulse decoupled ga
Data Format    = 1D COMPLEX
Dim Size      = 26214
X Domain      = 13C
Dim Title     = 13C
Dim Units     = [ppm]
Dimensions    = X
Site          = ECX 400
Spectrometer  = JNM-ECX400

```

```

Field Strength = 9.389766[T] (400[MHz])
X Acq Duration = 1.04333312[s]
X Domain       = 13C
X Freq        = 100.52530333[MHz]
X Offset      = 120[ppm]
X Points      = 32768
X Prescans    = 4
X Resolution   = 0.95846665[Hz]
X Sweep       = 31.40703518[kHz]
Irr Domain    = 1H
Irr Freq      = 399.78219838[MHz]
Irr Offset    = 5[ppm]
Clipped       = FALSE
Scans         = 4000
Total Scans   = 4000

```

```

Relaxation_Delay = 2[s]
Recvr Gain       = 48
Temp Get        = 0[dC]
X 90 Width      = 13.87[us]
X Acq Time      = 1.04333312[s]
X Angle         = 30[deg]
X Atn           = 5.2[dB]
X Pulse         = 4.62333333[us]
Irr Atn Dec     = 29.907[dB]
Irr Atn Noe    = 29.907[dB]
Irr Noise       = WALTZ
Decoupling      = TRUE
Initial_Wait    = 1[s]
Noe             = TRUE

```

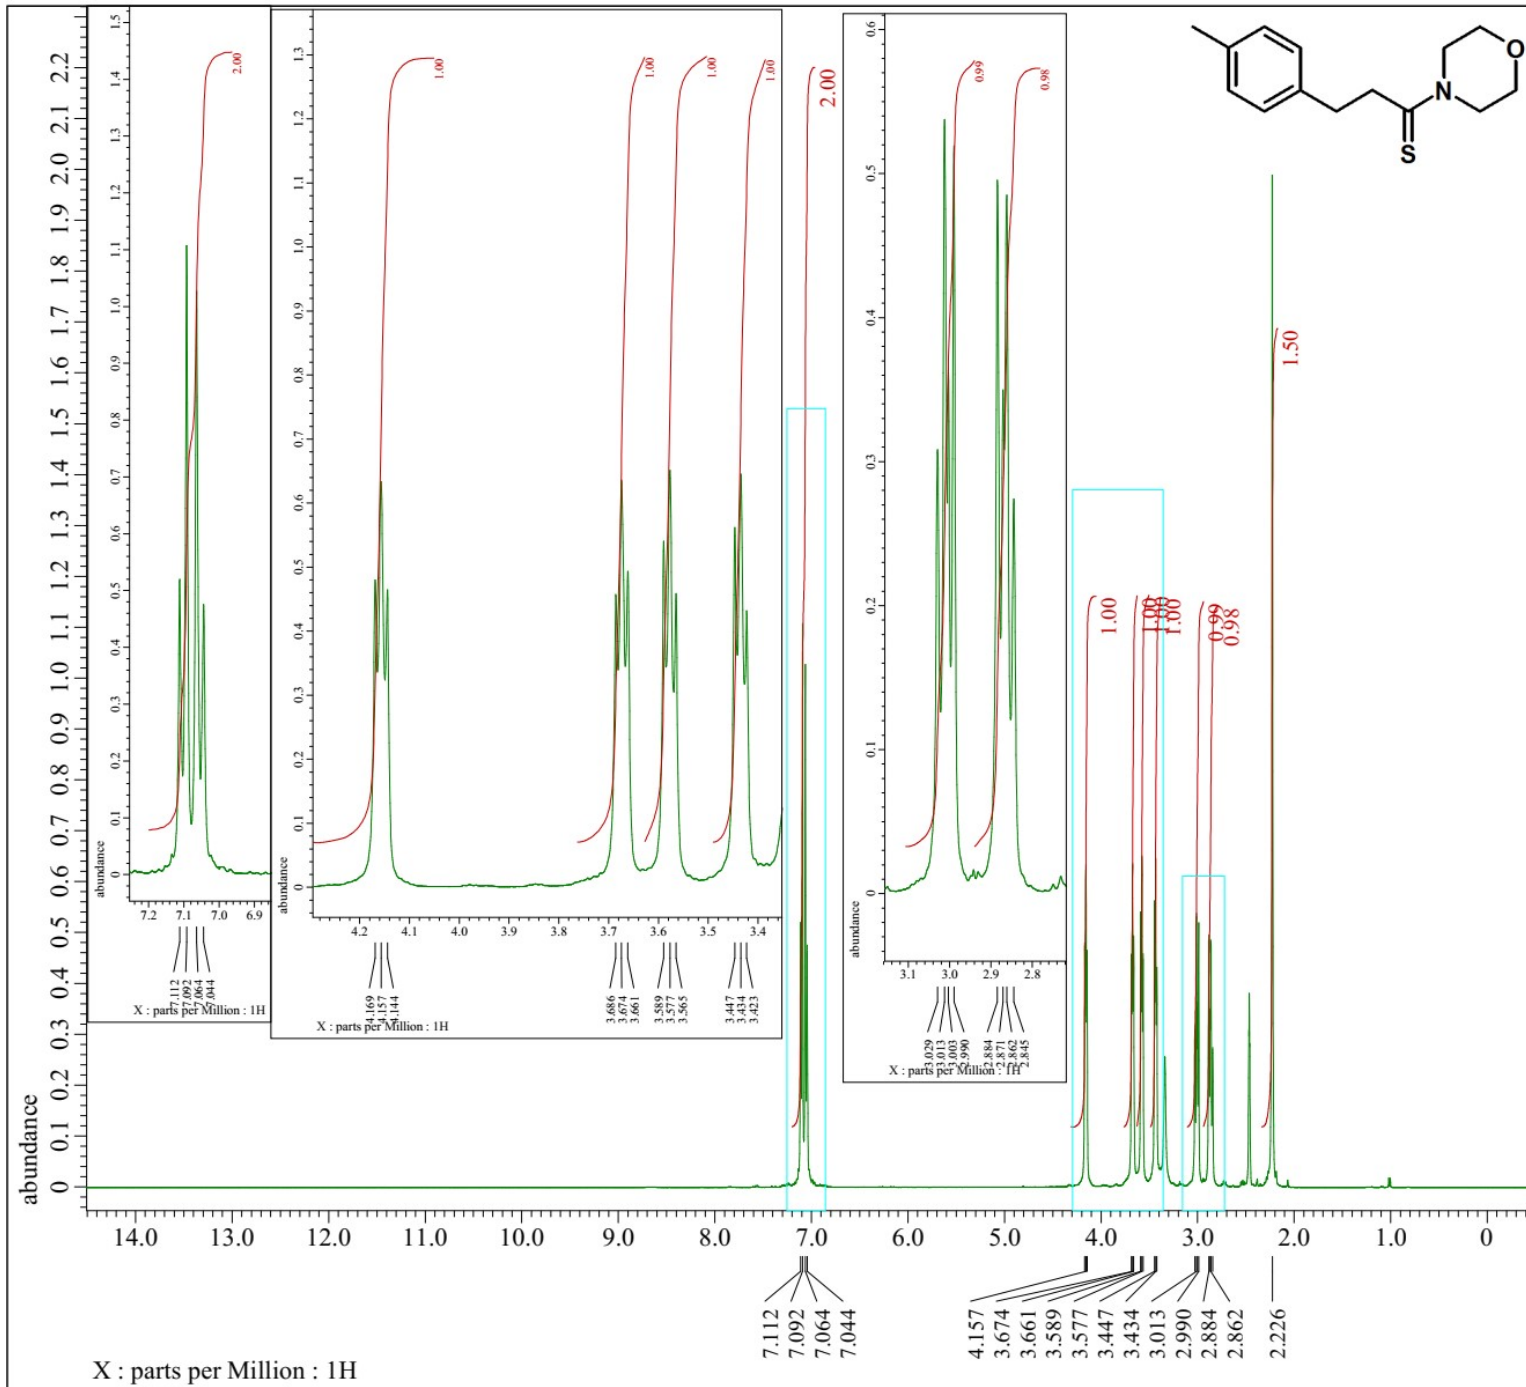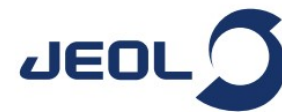

----- PROCESSING PARAMETERS -----  
 sexp( 0.2[Hz], 0.0[s] )  
 trapezoid( 0[%], 0[%], 80[%], 100[%] )  
 zerofill( 1, TRUE )  
 fft( 1, TRUE, TRUE )  
 machinephase  
 ppm  
 Получено из: MED\_1H\_4-MeC6H4CH2CH2CSMorph-1.j

Filename = MED\_1H\_4-MeC6H4CH2CH2CSMo  
 Author = delta  
 Experiment = single\_pulse.ex2  
 Sample\_Id = MED\_4-MeC6H4CH2CH2CSMorph  
 Solvent = DMSO-D6  
 Actual\_Start\_Time = 13-JUL-2023 04:06:18  
 Revision\_Time = 13-JUL-2023 15:27:16

Comment = single\_pulse  
 Data\_Format = 1D COMPLEX  
 Dim\_Size = 26214  
 X\_Domain = 1H  
 Dim\_Title = 1H  
 Dim\_Units = [ppm]  
 Dimensions = X  
 Site = ECX 400  
 Spectrometer = JNM-ECX400

Field\_Strength = 9.389766[T] (400[MHz])  
 X\_Acq\_Duration = 4.36731904[s]  
 X\_Domain = 1H  
 X\_Freq = 399.78219838[MHz]  
 X\_Offset = 7[ppm]  
 X\_Points = 32768  
 X\_Prescans = 1  
 X\_Resolution = 0.22897343[Hz]  
 X\_Sweep = 7.5030012[kHz]  
 Irr\_Domain = 1H  
 Irr\_Freq = 399.78219838[MHz]  
 Irr\_Offset = 5[ppm]  
 Tri\_Domain = 1H  
 Tri\_Freq = 399.78219838[MHz]  
 Tri\_Offset = 5[ppm]  
 Clipped = FALSE  
 Scans = 8  
 Total\_Scans = 8

Relaxation\_Delay = 5[s]  
 Recvr\_Gain = 22  
 Temp\_Get = 0[dC]  
 X\_90\_Width = 5.5[us]  
 X\_Acq\_Time = 4.36731904[s]  
 X\_Angle = 45[deg]  
 X\_Atn = 3.5[dB]  
 X\_Pulse = 2.75[us]  
 Irr\_Mode = Off  
 Tri\_Mode = Off  
 Dante\_Presat = FALSE

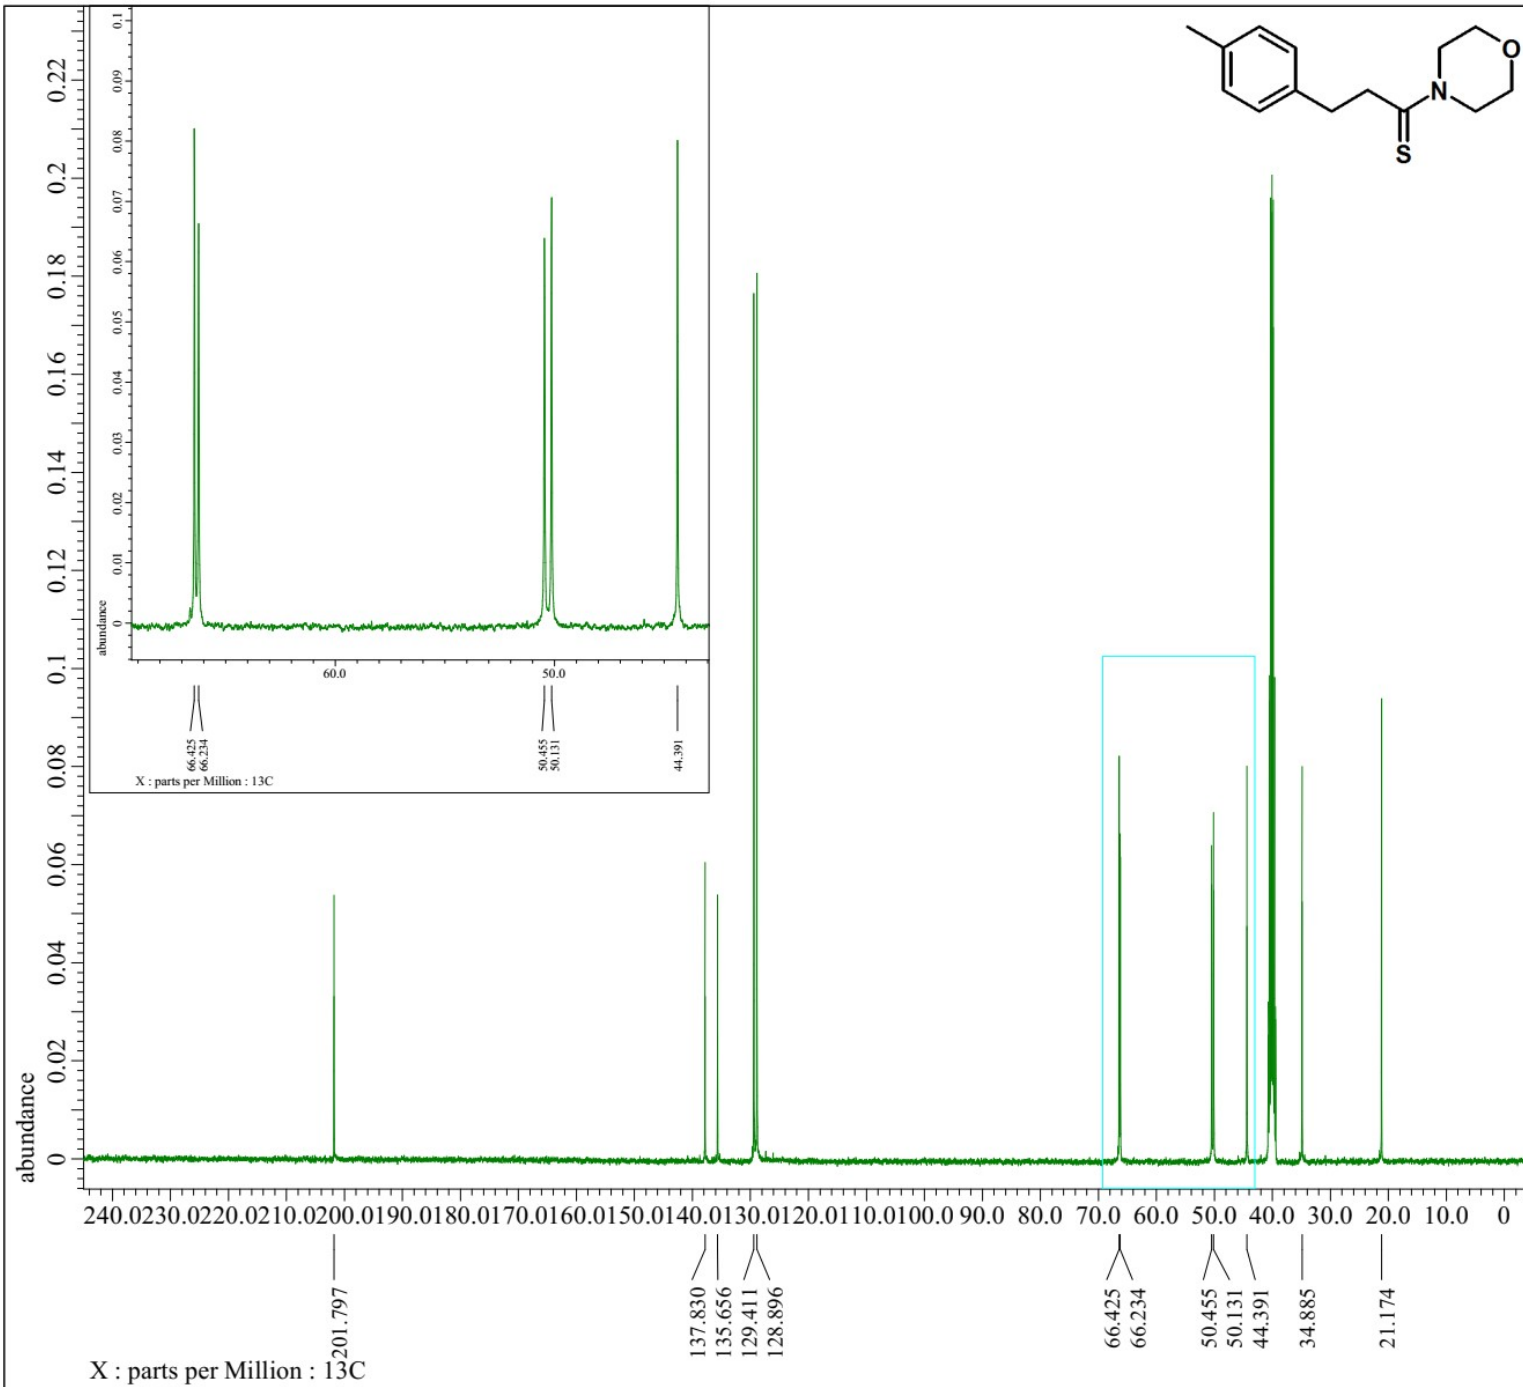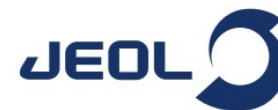

```

---- PROCESSING PARAMETERS ----
sexp( 2.0[Hz], 0.0[s] )
trapezoid( 0[%], 0[%], 80[%], 100[%] )
zerofill( 1, TRUE )
fft( 1, TRUE, TRUE )
machinephase
ppm
  
```

Получено из: MED\_13C\_4-MeC6H4CH2CH2CSMorph-1.

```

Filename      = MED_13C_4-MeC6H4CH2CH2CSM
Author        = delta
Experiment    = single_pulse_dec
Sample_Id     = MED_4-MeC6H4CH2CH2CSMorph
Solvent       = DMSO-D6
Actual_Start_Time = 13-JUL-2023 04:08:20
Revision_Time  = 13-JUL-2023 15:33:55
  
```

```

Comment       = single pulse decoupled ga
Data_Format   = 1D COMPLEX
Dim_Size      = 26214
X_Domain      = 13C
Dim_Title     = 13C
Dim_Units     = [ppm]
Dimensions    = X
Site          = ECX 400
Spectrometer  = JNM-ECX400
  
```

```

Field_Strength = 9.389766[T] (400[MHz])
X_Acq_Duration = 1.04333312[s]
X_Domain       = 13C
X_Freq         = 100.52530333[MHz]
X_Offset       = 120[ppm]
X_Points       = 32768
X_Prescans     = 4
X_Resolution   = 0.95846665[Hz]
X_Sweep        = 31.40703518[kHz]
Irr_Domain     = 1H
Irr_Freq       = 399.78219838[MHz]
Irr_Offset     = 5[ppm]
Clipped        = FALSE
Scans          = 4000
Total_Scans    = 4000
  
```

```

Relaxation_Delay = 2[s]
Recvr_Gain       = 46
Temp_Get         = 0[dC]
X_90_Width       = 13.87[us]
X_Acq_Time       = 1.04333312[s]
X_Angle          = 30[deg]
X_Atn            = 5.2[dB]
X_Pulse          = 4.62333333[us]
Irr_Atn_Dec      = 29.907[dB]
Irr_Atn_Noise   = 29.907[dB]
Irr_Noise        = WALTZ
Decoupling       = TRUE
Initial_Wait     = 1[s]
Noe              = TRUE
  
```



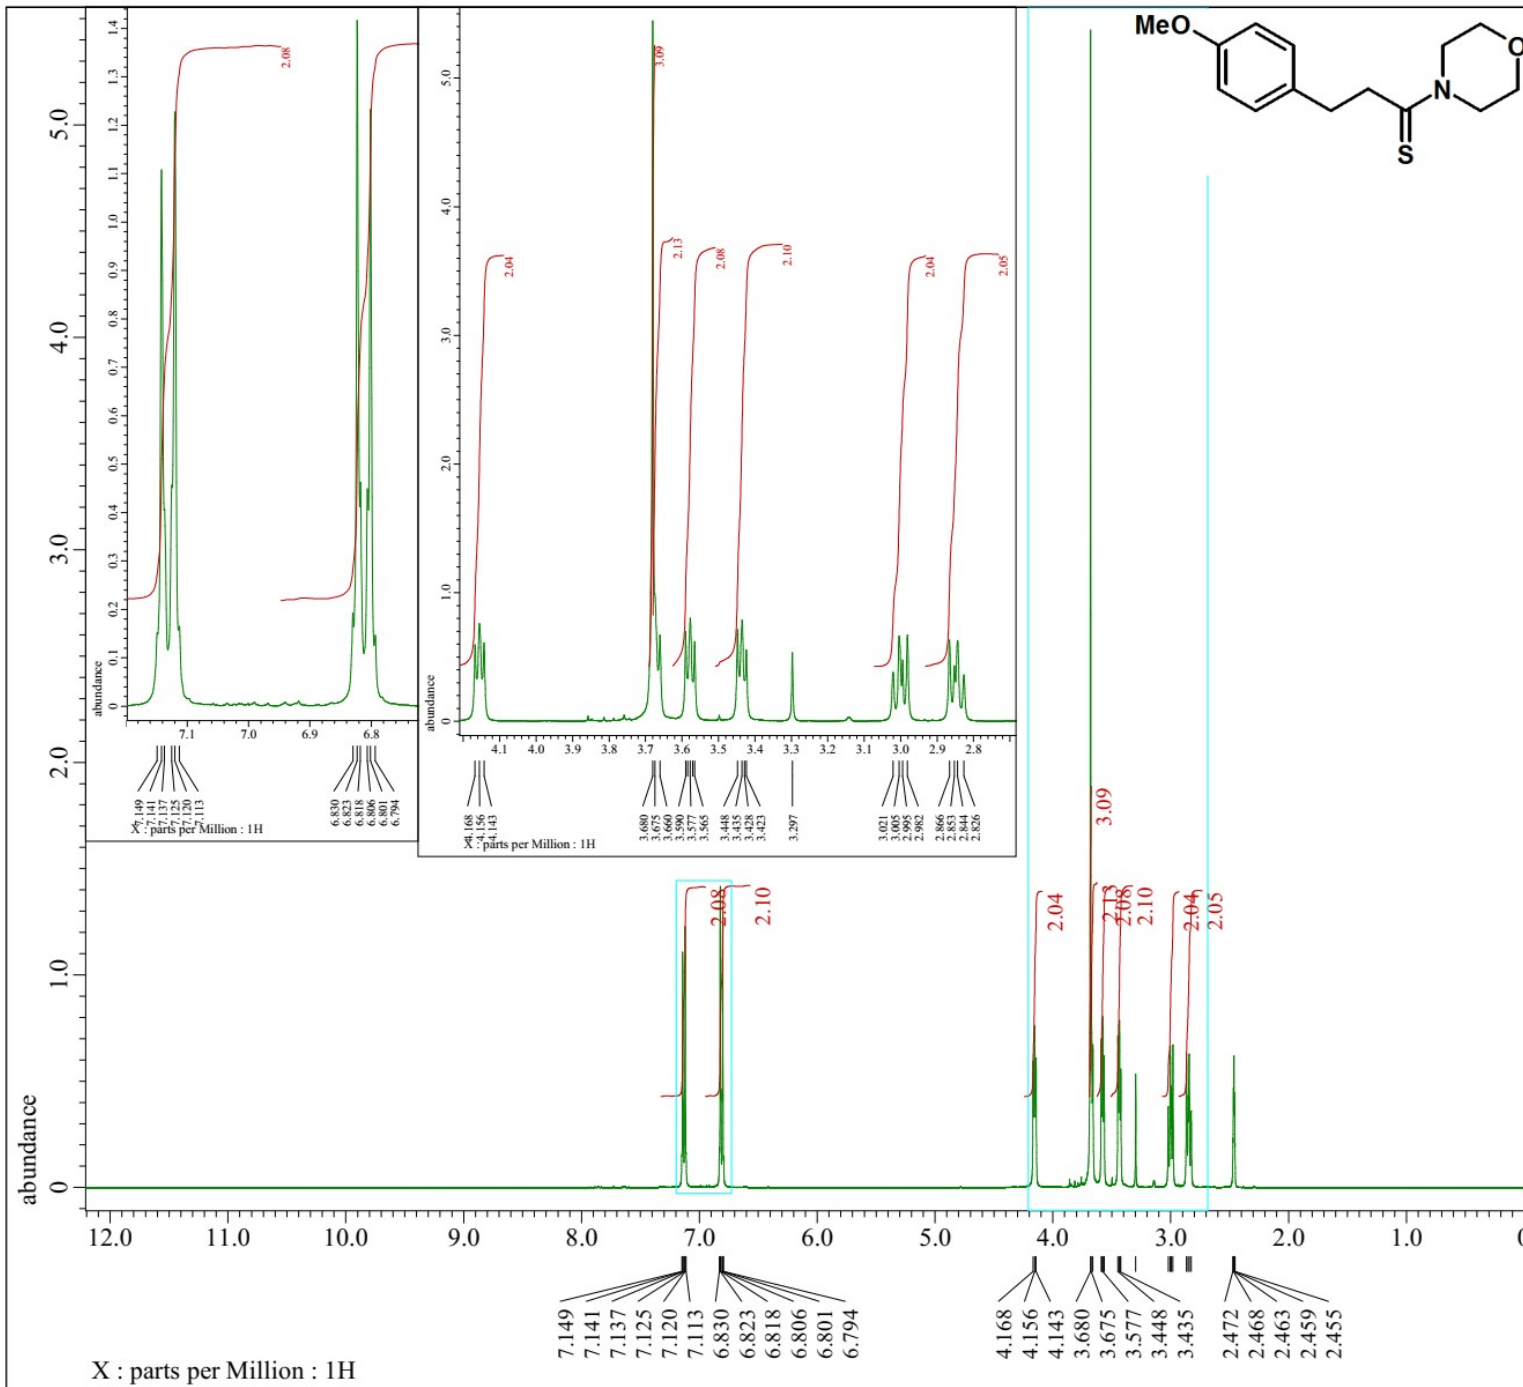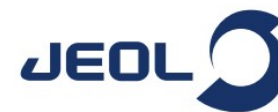

```

---- PROCESSING PARAMETERS ----
sexp( 0.2[Hz], 0.0[s] )
trapezoid( 0[%], 0[%], 80[%], 100[%] )
zerofill( 1, TRUE )
fft( 1, TRUE, TRUE )
machinephase
ppm
Derived from: MED_1H_4-MeOPhCH2CH2C2SMorph-1.j

```

```

Filename      = MED_1H_4-MeOPhCH2CH2C2SMor
Author        = delta
Experiment    = single_pulse.ex2
Sample_Id     = MED_4-MeOPhCH2CH2C2SMorph
Solvent       = DMSO-D6
Actual_Start_Time = 8-JAN-2024 11:36:27
Revision_Time  = 15-JAN-2024 20:35:09

```

```

Comment       = single_pulse
Data_Format   = 1D_COMPLEX
Dim_Size      = 26214
X_Domain      = 1H
Dim_Title     = 1H
Dim_Units     = [ppm]
Dimensions    = X
Site          = ECX 400
Spectrometer  = JNM-ECX400

```

```

Field_Strength = 9.389766[T] (400[MHz])
X_Acq_Duration = 4.36731904[s]
X_Domain       = 1H
X_Freq         = 399.78219838[MHz]
X_Offset       = 7[ppm]
X_Points       = 32768
X_Prescans     = 1
X_Resolution   = 0.22897343[Hz]
X_Sweep        = 7.5030012[kHz]
Irr_Domain     = 1H
Irr_Freq       = 399.78219838[MHz]
Irr_Offset     = 5[ppm]
Tri_Domain     = 1H
Tri_Freq       = 399.78219838[MHz]
Tri_Offset     = 5[ppm]
Clipped        = FALSE
Scans          = 8
Total_Scans    = 8

```

```

Relaxation_Delay = 5[s]
Recvr_Gain       = 24
Temp_Get         = 0[dC]
X_90_Width      = 6.6[us]
X_Acq_Time       = 4.36731904[s]
X_Angle          = 45[deg]
X_Atn            = 3.5[dB]
X_Pulse         = 3.3[us]
Irr_Mode         = Off
Tri_Mode         = Off
Dante_Presat    = FALSE

```



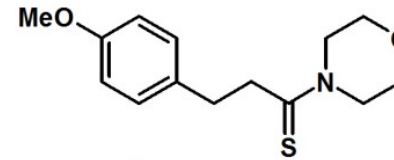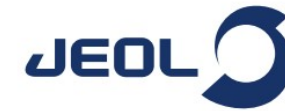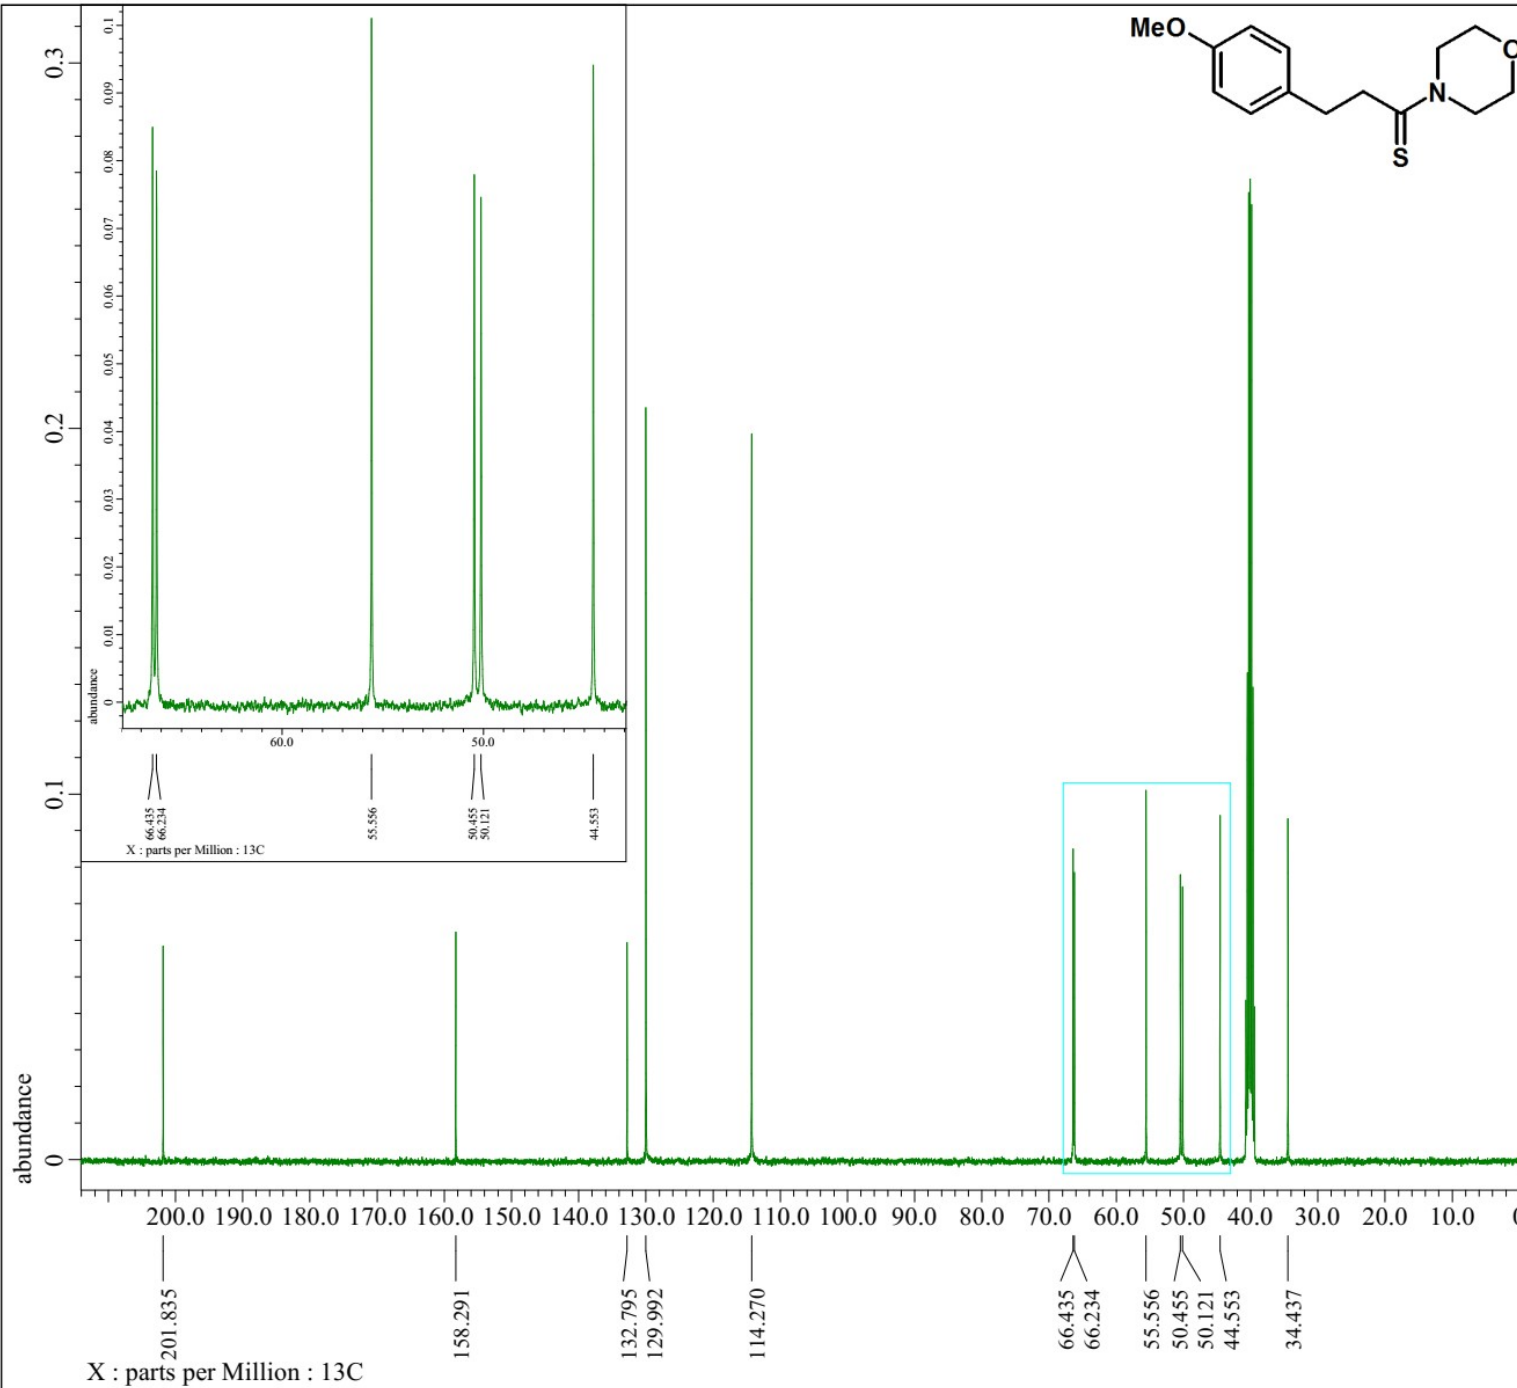

```

---- PROCESSING PARAMETERS ----
sexp( 2.0[Hz], 0.0[s] )
trapezoid( 0[%], 0[%], 80[%], 100[%] )
zerofill( 1, TRUE )
fft( 1, TRUE, TRUE )
machinephase
ppm
Derived from: MED_13C_4-MeOPhCH2CH2CSMorph-1.

```

```

Filename      = MED_13C_4-MeOPhCH2CH2CSMo
Author        = delta
Experiment    = single_pulse_dec
Sample Id     = MED_4-MeOPhCH2CH2CSMorph
Solvent       = DMSO-D6
Actual_Start Time = 8-JAN-2024 11:38:28
Revision_Time = 15-JAN-2024 20:38:29

```

```

Comment      = single pulse decoupled ga
Data Format   = 1D_COMPLEX
Dim Size     = 26214
X_Domain     = 13C
Dim Title    = 13C
Dim Units    = [ppm]
Dimensions   = X
Site         = ECX 400
Spectrometer = JNM-ECX400

```

```

Field Strength = 9.389766[T] (400[MHz])
X_Acq_Duration = 1.04333312[s]
X_Domain       = 13C
X_Freq         = 100.52530333[MHz]
X_Offset       = 120[ppm]
X_Points       = 32768
X_Prescans     = 4
X_Resolution   = 0.95846665[Hz]
X_Sweep        = 31.40703518[kHz]
Irr_Domain     = 1H
Irr_Freq       = 399.78219838[MHz]
Irr_Offset     = 5[ppm]
Clipped        = FALSE
Scans          = 3000
Total_Scans    = 3000

```

```

Relaxation_Delay = 2[s]
Recvr Gain       = 48
Temp_Get         = 0[dC]
X_90_Width      = 13.87[us]
X_Acq_Time      = 1.04333312[s]
X_Angle         = 30[deg]
X_Atn           = 5.2[dB]
X_Pulse         = 4.62333333[us]
Irr_Atn_Dec     = 29.907[dB]
Irr_Atn_Noise  = 29.907[dB]
Irr_Noise       = WALTZ
Decoupling      = TRUE
Initial_Wait    = 1[s]
Noe              = TRUE

```

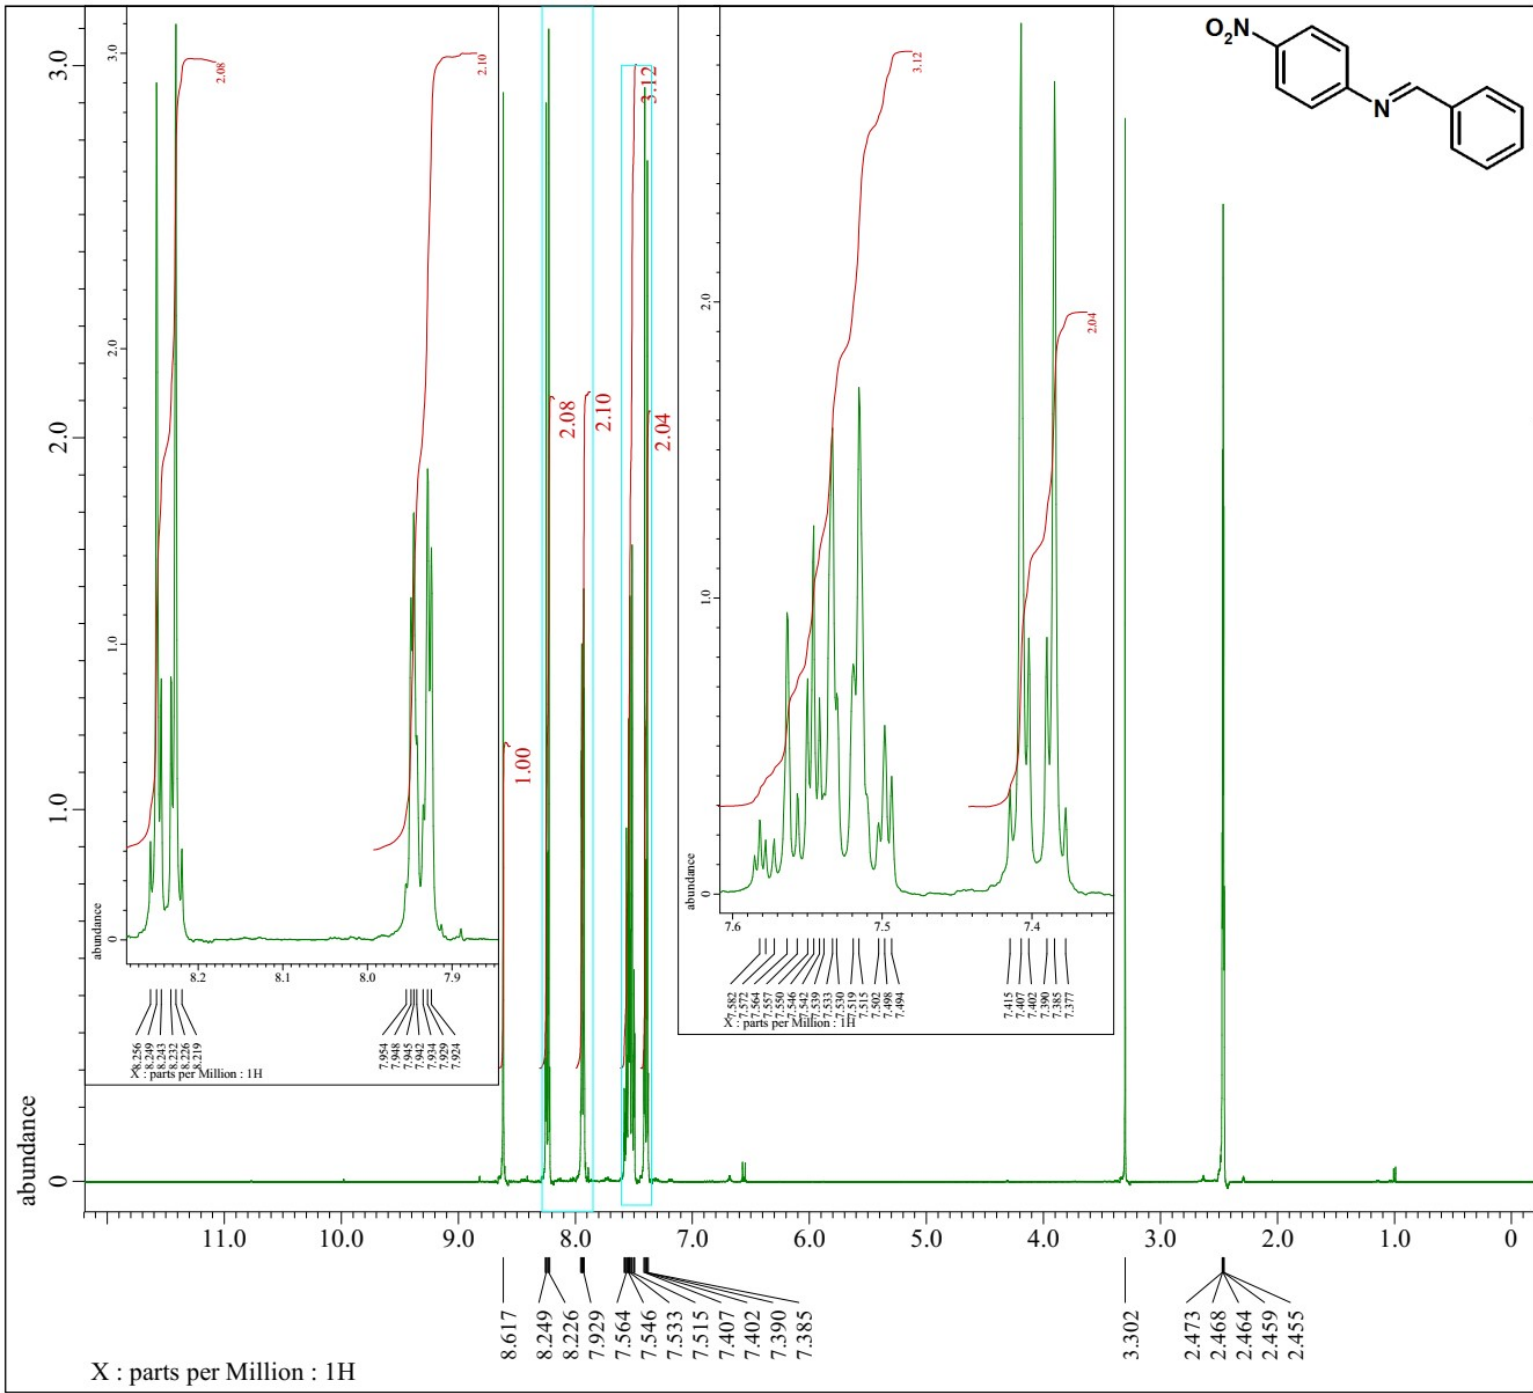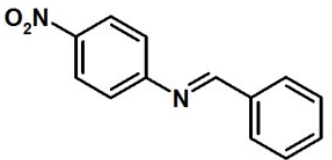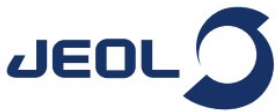

```

---- PROCESSING PARAMETERS ----
sexp( 0.2[Hz], 0.0[s] )
trapezoid( 0[%], 0[%], 80[%], 100[%] )
zerofill( 1, TRUE )
fft( 1, TRUE, TRUE )
machinephase
ppm
Derived from: MED_1H_4-NO2PhMethylideneAnilin

```

```

Filename      = MED_1H_4-NO2PhMethylidene
Author        = delta
Experiment     = single_pulse.ex2
Sample Id     = MED_4-NO2PhMethylideneAni
Solvent       = DMSO-D6
Actual_Start_Time = 8-JAN-2024 14:20:48
Revision_Time  = 15-JAN-2024 20:28:40

```

```

Comment       = single_pulse
Data_Format   = 1D COMPLEX
Dim_Size      = 26214
X_Domain     = 1H
Dim_Title    = 1H
Dim_Units    = [ppm]
Dimensions    = X
Site         = ECX 400
Spectrometer  = JNM-ECX400

```

```

Field Strength = 9.389766[T] (400[MHz])
X_Acq_Duration = 4.36731904[s]
X_Domain      = 1H
X_Freq       = 399.78219838[MHz]
X_Offset     = 7[ppm]
X_Points     = 32768
X_Prescans   = 1
X_Resolution = 0.22897343[Hz]
X_Sweep      = 7.5030012[kHz]
Irr_Domain   = 1H
Irr_Freq     = 399.78219838[MHz]
Irr_Offset   = 5[ppm]
Tri_Domain   = 1H
Tri_Freq     = 399.78219838[MHz]
Tri_Offset   = 5[ppm]
Clipped      = FALSE
Scans        = 8
Total_Scans  = 8

```

```

Relaxation_Delay = 5[s]
Recvr_Gain       = 34
Temp_Get        = 0[dC]
X_90_Width     = 6.6[us]
X_Acq_Time     = 4.36731904[s]
X_Angle        = 45[deg]
X_Atn          = 3.5[dB]
X_Pulse        = 3.3[us]
Irr_Mode       = Off
Tri_Mode       = Off
Dante_Presat   = FALSE

```

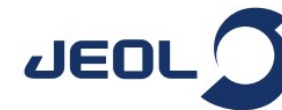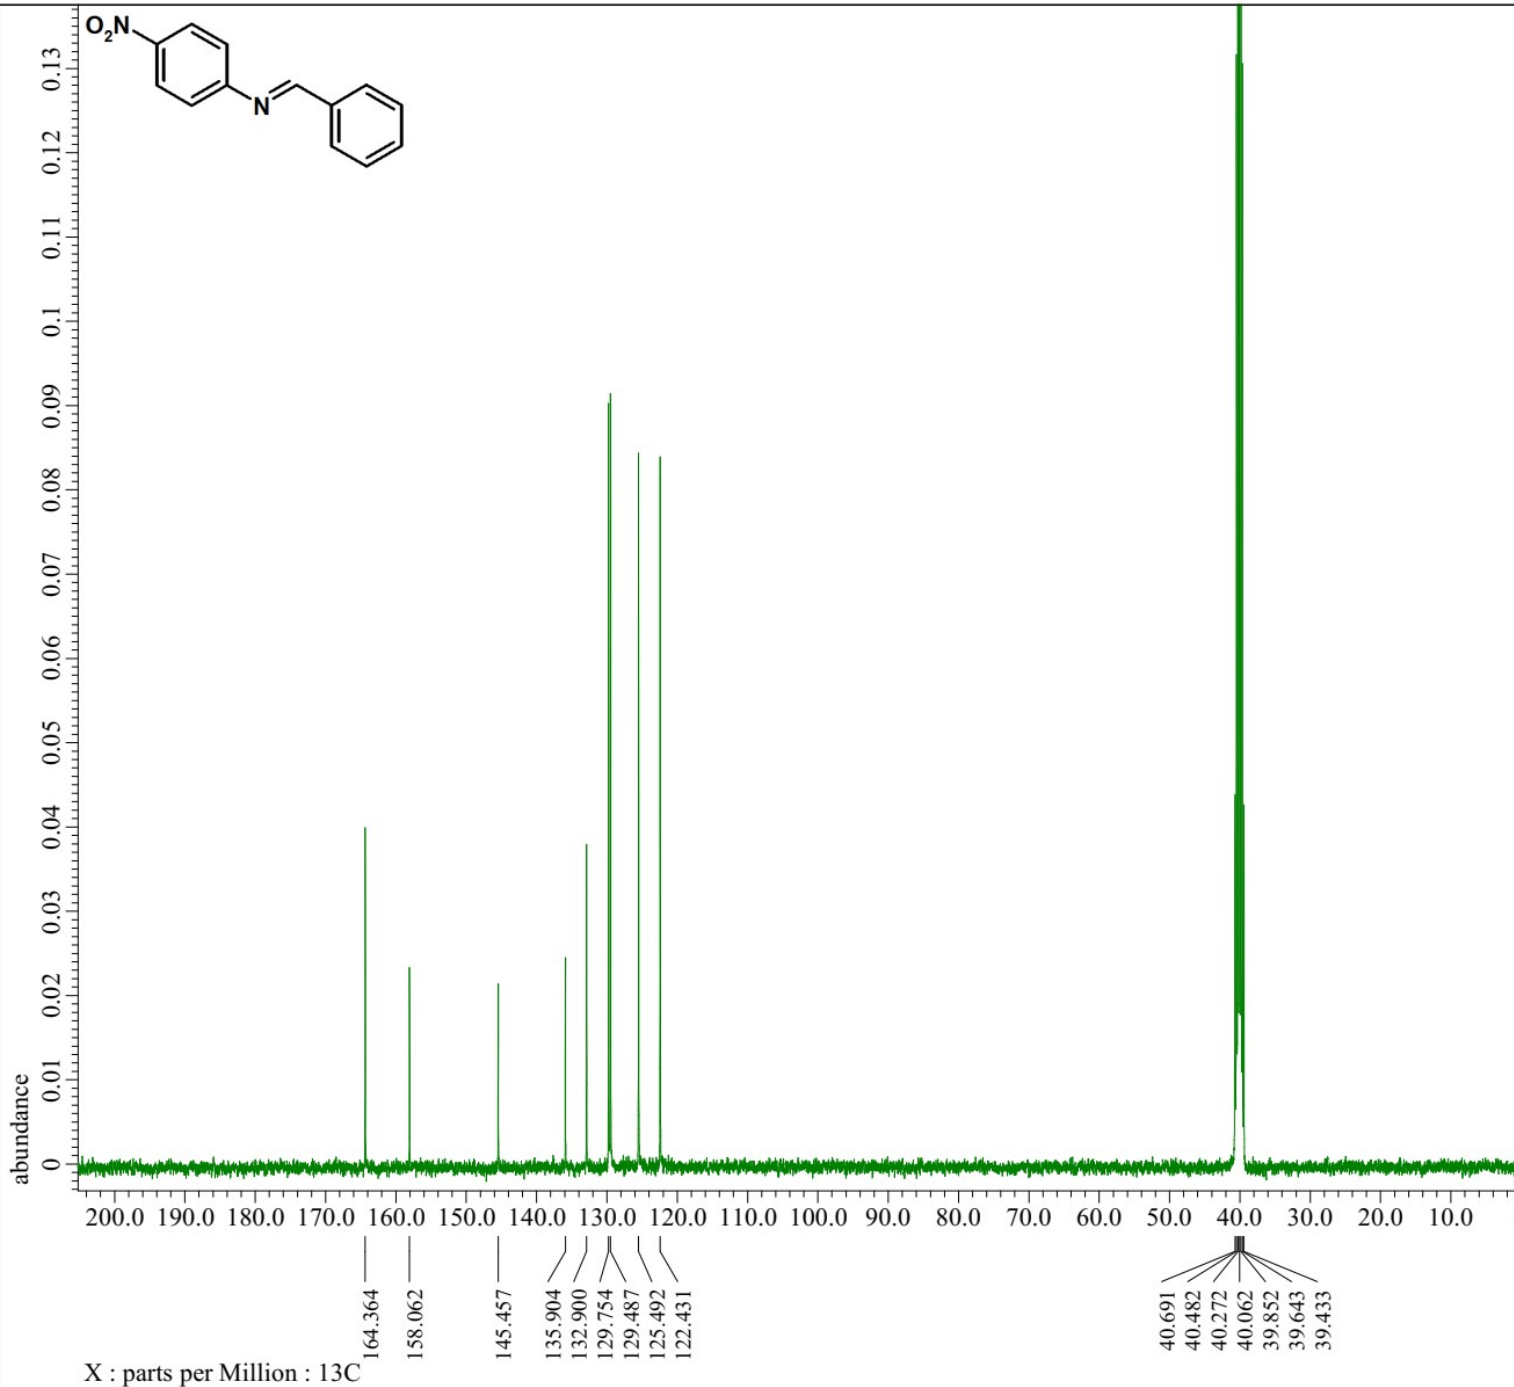

---- PROCESSING PARAMETERS ----  
sexp( 2.0[Hz], 0.0[s] )  
trapezoid( 0[%], 0[%], 80[%], 100[%] )  
zerofill( 1, TRUE )  
fft( 1, TRUE, TRUE )  
machinephase  
ppm

Derived from: MED\_13C\_4-NO2PhMethylideneAnili

Filename = MED\_13C\_4-NO2PhMethyliden  
Author = delta  
Experiment = single\_pulse\_dec  
Sample Id = MED\_4-NO2PhMethylideneAni  
Solvent = DMSO-D6  
Actual\_Start\_Time = 8-JAN-2024 14:22:50  
Revision\_Time = 15-JAN-2024 20:30:19

Comment = single pulse decoupled ga  
Data\_Format = 1D COMPLEX  
Dim\_Size = 26214  
X\_Domain = 13C  
Dim\_Title = 13C  
Dim\_Units = [ppm]  
Dimensions = X  
Site = ECX 400  
Spectrometer = JNM-ECX400

Field\_Strength = 9.389766[T] (400[MHz])  
X\_Acq\_Duration = 1.04333312[s]  
X\_Domain = 13C  
X\_Freq = 100.52530333[MHz]  
X\_Offset = 120[ppm]  
X\_Points = 32768  
X\_Prescans = 4  
X\_Resolution = 0.95846665[Hz]  
X\_Sweep = 31.40703518[kHz]  
Irr\_Domain = 1H  
Irr\_Freq = 399.78219838[MHz]  
Irr\_Offset = 5[ppm]  
Clipped = FALSE  
Scans = 3000  
Total\_Scans = 3000

Relaxation\_Delay = 2[s]  
Recvr\_Gain = 48  
Temp\_Get = 0[dc]  
X\_90\_Width = 13.87[us]  
X\_Acq\_Time = 1.04333312[s]  
X\_Angle = 30[deg]  
X\_Atn = 5.2[dB]  
X\_Pulse = 4.62333333[us]  
Irr\_Atn\_Dec = 29.907[dB]  
Irr\_Atn\_No = 29.907[dB]  
Irr\_Noise = WALTZ  
Decoupling = TRUE  
Initial\_Wait = 1[s]  
Noe = TRUE

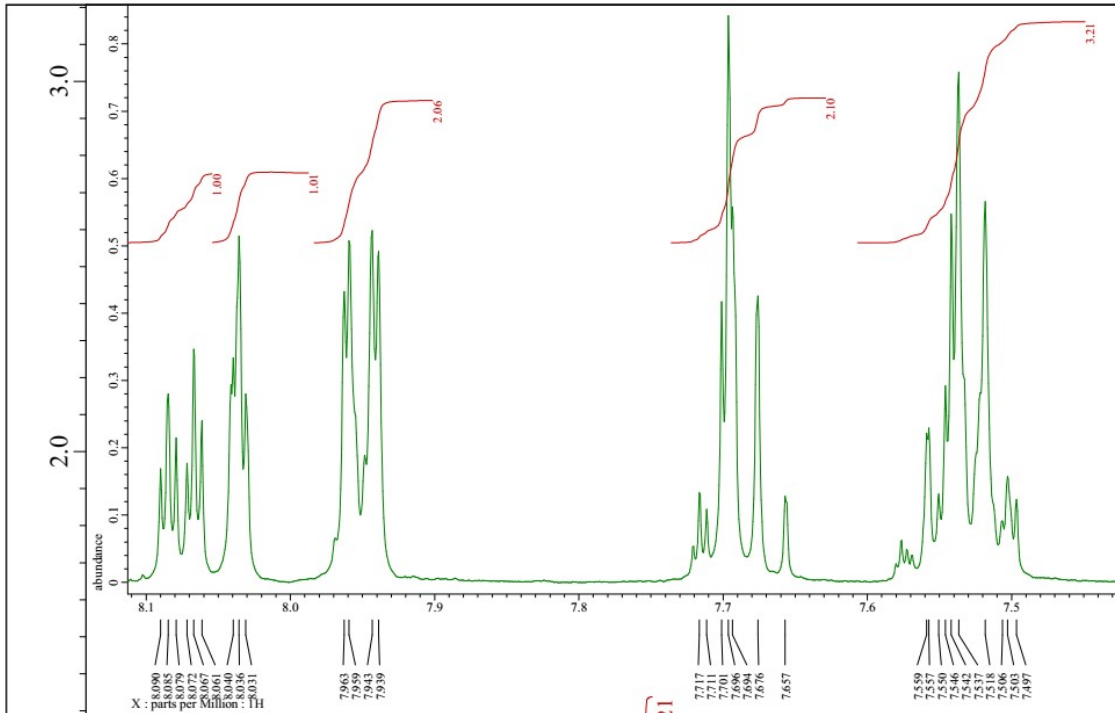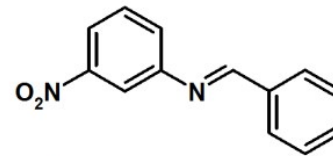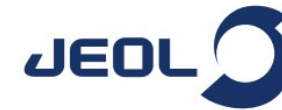

```

---- PROCESSING PARAMETERS ----
sexp( 0.2[Hz], 0.0[s] )
trapezoid( 0[%], 0[%], 80[%], 100[%] )
zerofill( 1, TRUE )
fft( 1, TRUE, TRUE )
machinephase
ppm
Derived from: MED_1H_3-NO2PhMethylideneAnilin

```

```

Filename      = MED_1H_3-NO2PhMethylidene
Author        = delta
Experiment    = single_pulse.ex2
Sample Id     = MED_3-NO2PhMethylideneAni
Solvent       = DMSO-D6
Actual_Start_Time = 10-JAN-2024 18:00:40
Revision_Time  = 15-JAN-2024 20:24:04

```

```

Comment       = single_pulse
Data_Format   = 1D_COMPLEX
Dim_Size      = 26214
X_Domain      = 1H
Dim_Title     = 1H
Dim_Units     = [ppm]
Dimensions    = X
Site          = ECX 400
Spectrometer  = JNM-ECX400

```

```

Field_Strength = 9.389766[T] (400[MHz])
X_Acq_Duration = 4.36731904[s]
X_Domain       = 1H
X_Freq         = 399.78219838[MHz]
X_Offset       = 7[ppm]
X_Points       = 32768
X_Prescans     = 1
X_Resolution   = 0.22897343[Hz]
X_Sweep        = 7.5030012[kHz]
Irr_Domain     = 1H
Irr_Freq       = 399.78219838[MHz]
Irr_Offset     = 5[ppm]
Tri_Domain     = 1H
Tri_Freq       = 399.78219838[MHz]
Tri_Offset     = 5[ppm]
Clipped        = FALSE
Scans          = 8
Total_Scans    = 8

```

```

Relaxation_Delay = 5[s]
Recvr_Gain       = 44
Temp_Get         = 0[dC]
X_90_Width      = 6.6[us]
X_Acq_Time      = 4.36731904[s]
X_Angle         = 45[deg]
X_Atn           = 3.5[dB]
X_Pulse         = 3.3[us]
Irr_Mode        = Off
Tri_Mode        = Off
Dante_Presat    = FALSE

```

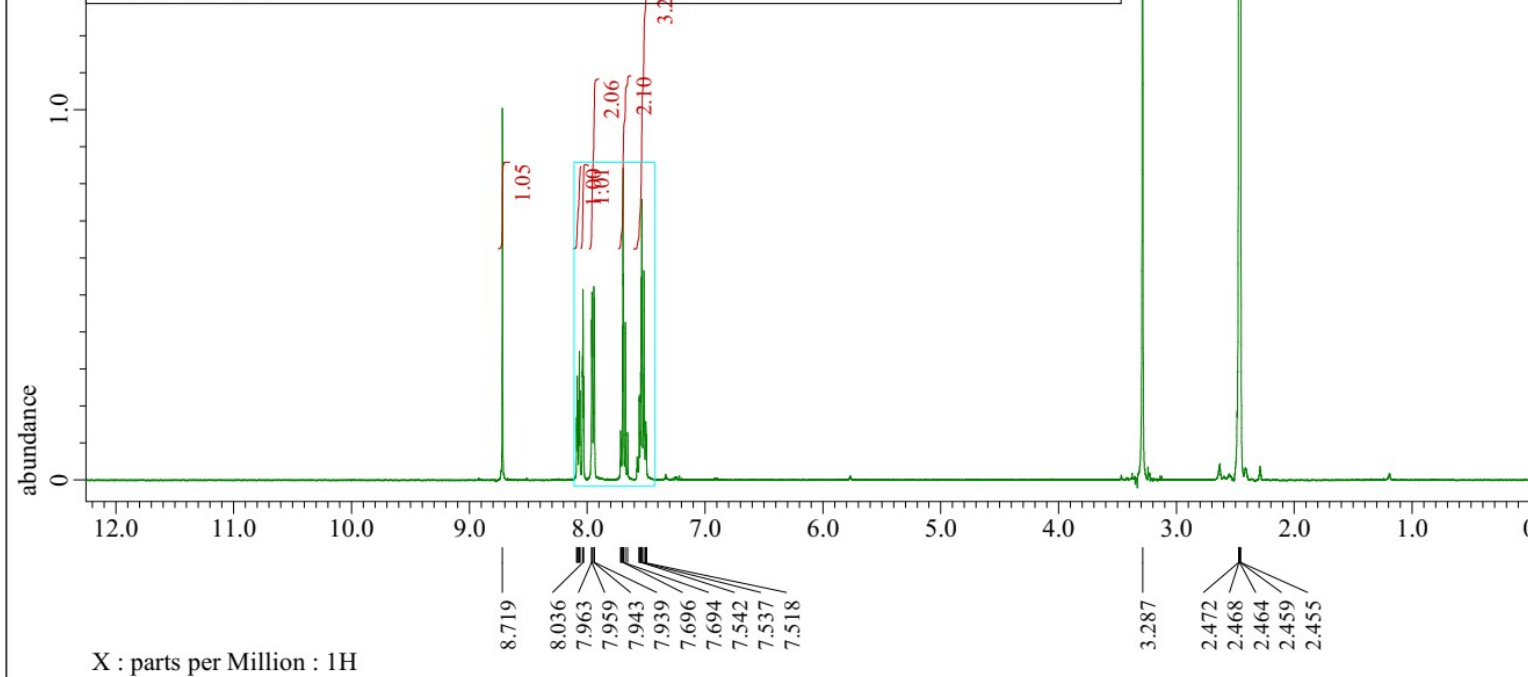

X : parts per Million : 1H



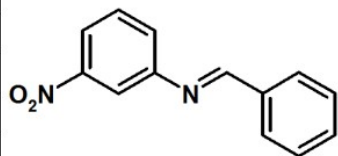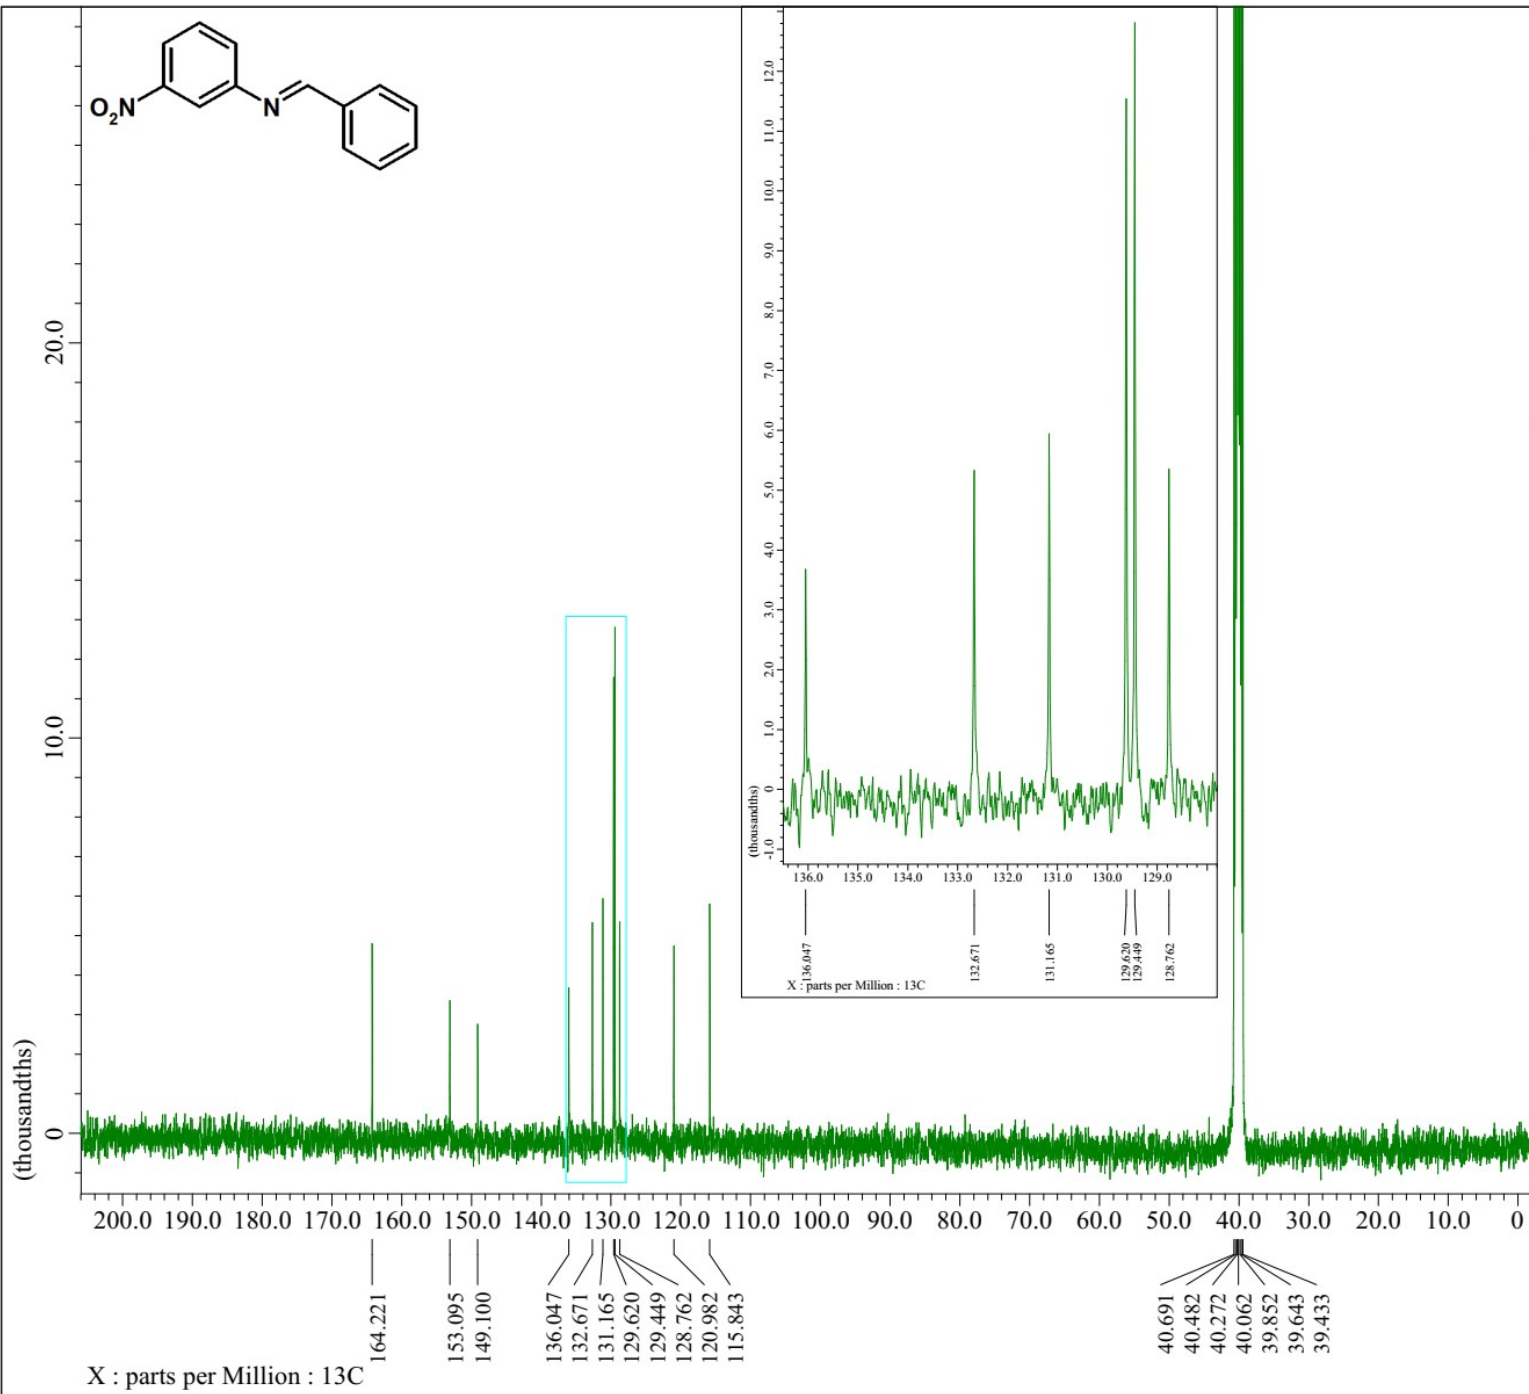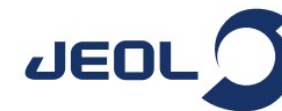

```

---- PROCESSING PARAMETERS ----
sexp( 2.0[Hz], 0.0[s] )
trapezoid( 0[%], 0[%], 80[%], 100[%] )
zerofill( 1, TRUE )
fft( 1, TRUE, TRUE )
machinephase
ppm
  
```

Derived from: MED\_13C\_3-NO2PhMethylideneAnili

```

Filename      = MED_13C_3-NO2PhMethyliden
Author        = delta
Experiment    = single_pulse_dec
Sample Id     = MED_3-NO2PhMethylideneAni
Solvent       = DMSO-D6
Actual_Start Time = 10-JAN-2024 20:47:56
Revision_Time  = 15-JAN-2024 20:26:58
  
```

```

Comment      = single pulse decoupled ga
Data Format   = 1D COMPLEX
Dim Size     = 26214
X Domain     = 13C
Dim Title    = 13C
Dim Units    = [ppm]
Dimensions   = X
Site         = ECX 400
Spectrometer = JNM-ECX400
  
```

```

Field Strength = 9.389766[T] (400[MHz])
X_Acq_Duration = 1.04333312[s]
X_Domain       = 13C
X_Freq         = 100.52530333[MHz]
X_Offset       = 120[ppm]
X_Points       = 32768
X_Prescans     = 4
X_Resolution   = 0.95846665[Hz]
X_Sweep        = 31.40703518[kHz]
Irr_Domain     = 1H
Irr_Freq       = 399.78219838[MHz]
Irr_Offset     = 5[ppm]
Clipped        = FALSE
Scans          = 10000
Total_Scans    = 10000
  
```

```

Relaxation_Delay = 2[s]
Recvr_Gain        = 48
Temp_Get          = 0[dC]
X_90_Width       = 13.87[us]
X_Acq_Time       = 1.04333312[s]
X_Angle          = 30[deg]
X_Atn            = 5.2[dB]
X_Pulse          = 4.62333333[us]
Irr_Atn_Dec      = 29.907[dB]
Irr_Atn_Noise    = 29.907[dB]
Irr_Noise        = WALTZ
Decoupling        = TRUE
Initial_Wait     = 1[s]
Noe               = TRUE
  
```
